# Supplementary material for: Novel Virus Identification through Metagenomics: A Systematic Review
Source: MDPI journal article supplement (doi:10.3390/life12122048), 2022-12-07
Supplement: s1 [file s1]

Table S2: Characteristic Table and list of the included studies

| n.Ref | Year | Sample size | Host        | Specimen              | Genome      | Sequencing | Assembly | Virus                                                                           | Viral Families                                                               | Provenance of the sample        | WHO Regions                         | Extraction kits                           | Extraction methods    | Enrichment methods         |
|-------|------|-------------|-------------|-----------------------|-------------|------------|----------|---------------------------------------------------------------------------------|------------------------------------------------------------------------------|---------------------------------|-------------------------------------|-------------------------------------------|-----------------------|----------------------------|
| [1]   | 2021 | 195         | animal      | fecal samples         | RNA         | illumina   | De novo  | Aichivirus D                                                                    | Picornaviridae,                                                              | China                           | South-East Asia region              | NucleoSpin RNA Stool kit (Macherey-Nagel) | Silica membrane-based |                            |
| [2]   | 2015 | 6           | environment | water                 | DNA         | illumina   | /        | Several                                                                         | Circoviridae, Unclassified                                                   | Arctic                          |                                     | Phenol-chloroform extraction method       | Solvent-based         | tangential flow filtration |
| [3]   | 2018 | 1           | plant       | plants                | RNA         | illumina   | /        | prunus geminivirus                                                              | Geminiviridae,                                                               | California                      | America region                      | /                                         | ND                    |                            |
| [4]   | 2019 | 2           | environment | water                 | DNA         | illumina   | De novo  | Phycodnavirus                                                                   | Phycodnaviridae,                                                             | Chile                           | America region                      | /                                         | ND                    | pore filtration            |
| [5]   | 2021 | 5           | environment | water                 | DNA         | illumina   | /        | Pp_CBA virus, PaV virus                                                         | Myoviridae, Phycodnaviridae                                                  | Southern Ocean                  |                                     | Formamide Procedure                       | Solvent-based         | tangential flow filtration |
| [6]   | 2014 | 1           | animal      | blood                 | RNA         | Roche_454  | /        | paramyxovirus                                                                   | Paramyxoviridae,                                                             | Uganda                          | Africa region                       | /                                         | ND                    |                            |
| [7]   | 2018 | 6           | animal      | tissue pools          | DNA         | illumina   | De novo  | amdoparvovirus                                                                  | Parvoviridae,                                                                | Sacramento                      | America region                      | MagMAX Viral RNA Isolation kit            | Magnetic beads-based  |                            |
| [8]   | 2020 | 17          | animal      | tissue pools          | DNA         | illumina   | De novo  | Circoviridae, Parvoviridae, Anelloviridae, Polyomaviridae, and Papillomaviridae | Parvoviridae, Anelloviridae, Circoviridae, Papillomaviridae, Polyomaviridae, | California                      | America region                      | MagMAX Viral RNA Isolation kit            | Magnetic beads-based  |                            |
| [9]   | 2020 | 1           | animal      | mesenteric lymph node | DNA         | illumina   | De novo  | parvovirus, polyomavirus, rotavirus, anellovirus                                | Parvoviridae, Anelloviridae, Reoviridae, Polyomaviridae                      | California                      | America region                      | MagMAX Viral RNA Isolation kit            | Magnetic beads-based  |                            |
| [10]  | 2021 | 6           | animal      | lung swab             | DNA and RNA | illumina   | De novo  | Parvoviruses and Picornavirus                                                   | Picornaviridae, Parvoviridae                                                 | California                      | America region                      | MagMAX Viral RNA Isolation kit            | Magnetic beads-based  |                            |
| [11]  | 2019 | ND          | animal      | gut                   | RNA         | illumina   | De novo  | Cyprivirus                                                                      | Picornaviridae,                                                              | North America, Europe, and Asia | America region, European region and | MagMAX Viral RNA Isolation kit            | Magnetic beads-based  |                            |

|      |      |          |             |                                                            |             |                     |         |                                              |                                                                                                                                                                                  |            |                        |                        |                                                                        |                                |  |                   |  |
|------|------|----------|-------------|------------------------------------------------------------|-------------|---------------------|---------|----------------------------------------------|----------------------------------------------------------------------------------------------------------------------------------------------------------------------------------|------------|------------------------|------------------------|------------------------------------------------------------------------|--------------------------------|--|-------------------|--|
|      |      |          |             |                                                            |             |                     |         |                                              |                                                                                                                                                                                  |            |                        | South-East Asia region |                                                                        |                                |  |                   |  |
| [12] | 2019 | 68       | animal      | plasma and cerobrospinal fluid                             | DNA         | Roche_454           | De novo | parvovirus                                   | Parvoviridae,                                                                                                                                                                    | /          |                        |                        | MagMAX Viral RNA Isolation kit                                         | Magnetic beads-based           |  |                   |  |
| [13] | 2019 | 57       | animal      | nasal swabs                                                | DNA         | illumina            | De novo | taupapillomaviruses                          | Papillomaviridae,                                                                                                                                                                | /          |                        |                        | MagMAX Viral RNA Isolation kit                                         | Magnetic beads-based           |  |                   |  |
| [14] | 2017 | ND       | environment | compost sample                                             | DNA         | illumina            | /       | Pseudomonas phages                           | Siphoviridae,                                                                                                                                                                    | Brazil     | America region         |                        | PowerSoil Max kit (MO BIO)                                             | Silica membrane-based          |  | pore filtration   |  |
| [15] | 2021 | 1        | environment | sewage waters                                              | DNA         | illumina            | De novo | Fadolivirus                                  | Mimiviridae,                                                                                                                                                                     | Algeria    | Africa region          |                        | EZ1 Advanced XL device (Qiagen)                                        | Magnetic beads-based           |  |                   |  |
| [16] | 2019 | 492      | animal      | serum, nasal and throat swabs, stools, cerebrospinal fluid | DNA and RNA | illumina            | De novo | several                                      | Adenoviridae, Coronaviridae, Nodaviridae, Picornaviridae, Picobirnaviridae, Parvoviridae, Papillomaviridae, Partitiviridae, Reoviridae, Rhabdoviridae, Totiviridae, Unclassified | Vietnam    | South-East Asia region |                        | QIAamp viral RNA kit (Qiagen)                                          | Silica membrane-based          |  |                   |  |
| [17] | 2015 | 40       | animal      | swab samples                                               | DNA         | illumina            | /       | hpv                                          | Papillomaviridae,                                                                                                                                                                | Sweden     | European region        |                        | MagNA Pure LC - Total Nucleic Acid Kit (Roche)                         | Magnetic glass particles-based |  |                   |  |
| [18] | 2014 | Database | animal      | muscle tissue                                              | DNA         | illumina and sanger | /       | Herpesvirus                                  | Herpesviridae,                                                                                                                                                                   | Germany    | European region        |                        | /                                                                      | ND                             |  |                   |  |
| [19] | 2017 | Database | animal      | fish                                                       | DNA         | sanger              | /       | Herpesvirus                                  | Herpesviridae,                                                                                                                                                                   | Oxford     | European region        |                        | DNeasy Blood & Tissue Kit (Qiagen)                                     | Column-based                   |  |                   |  |
| [20] | 2014 | 2        | environment | wastewater                                                 | DNA         | illumina            | /       | Cyclovirus                                   | Cycloviridae,                                                                                                                                                                    | Philippine | South-East Asia region |                        | QIAamp MinElute Virus Spin Kit (Qiagen), RNeasy Plus Mini Kit (Qiagen) | Column-based, Column-based     |  | PEG precipitation |  |
| [21] | 2014 | 27       | animal      | fecal samples                                              | DNA and RNA | illumina            | De novo | sapovirus, kobuvirus, PBV, PBoV-2 and PBoV-4 | Caliciviridae, Picornaviridae                                                                                                                                                    | China      | South-East Asia region |                        | QIAamp viral RNA mini kit (Qiagen)                                     | Other/multiple type            |  |                   |  |

|      |      |          |             |                                                                          |     |             |         |                                                                       |                                                                 |                                |                           |                                                                                                                          |                                                    |                                  |
|------|------|----------|-------------|--------------------------------------------------------------------------|-----|-------------|---------|-----------------------------------------------------------------------|-----------------------------------------------------------------|--------------------------------|---------------------------|--------------------------------------------------------------------------------------------------------------------------|----------------------------------------------------|----------------------------------|
| [22] | 2019 | 3        | environment | sediments                                                                | DNA | illumina    | De novo | pythoviruses,<br>marseilleviruses,<br>iridoviruses,<br>klosneuviruses | Pithoviridae,<br>Marseilleviridae,<br>Iridoviridae, Mimiviridae | Atlantic<br>Ocean              |                           | /                                                                                                                        | ND                                                 | ultracentrifugation              |
| [23] | 2015 | 2        | plant       | wood tissue                                                              | RNA | illumina    | De novo | Luteovirus                                                            | Luteoviridae,                                                   | California                     | America<br>region         | /                                                                                                                        | ND                                                 |                                  |
| [24] | 2020 | ND       | animal      | insects                                                                  | RNA | illumina    | /       | flaviviruses                                                          | Flaviviridae,                                                   | Cambodia<br>and Thailand       | Western<br>Pacific region | QIAamp<br>viral RNA<br>mini kit<br>(Qiagen)<br>GeneJet Viral<br>DNA<br>and RNA<br>Purification<br>Kit (Thermo<br>Fisher) | Other/multiple<br>type                             |                                  |
| [25] | 2017 | 10       | animal      | fecal samples                                                            | RNA | Ion Torrent | De novo | rotaviruses                                                           | Reoviridae,                                                     | Serbia                         | European<br>region        |                                                                                                                          | Column-based                                       |                                  |
| [26] | 2018 | Database | animal      | nasopharyngeal aspirates,<br>serum, feces,<br>and cerebrospinal<br>fluid | DNA | illumina    | /       | Torque Teno virus<br>(TTV)                                            | Anelloviridae,                                                  | Sweden                         | European<br>region        | /                                                                                                                        | ND                                                 |                                  |
| [27] | 2020 | 3        | environment | seawater                                                                 | DNA | illumina    | /       | Pelagiphages                                                          | Podoviridae,                                                    | Hawaii                         | America<br>region         | Genomic-tip<br>20/G<br>purification<br>kit (Qiagen)                                                                      | Column-based                                       | tangential<br>flow<br>filtration |
| [28] | 2019 | 12       | environment | water                                                                    | DNA | illumina    | De novo | Mamiellales SAG-associated circular<br>virus' (MACV)                  | Unclassified,                                                   | Indian Ocean                   |                           | multiple<br>displacement<br>amplification<br>(MDA)                                                                       | Other/multiple<br>type                             | tangential<br>flow<br>filtration |
| [29] | 2020 | 91       | plant       | wood tissue                                                              | RNA | illumina    | De novo | Potyviridae and<br>Bunyavirales order                                 | Peribunyaviridae,<br>Potyviridae                                | Several<br>european<br>country | European<br>region        | Phenol-<br>chloroform<br>extraction<br>method                                                                            | Solvent-based                                      |                                  |
| [30] | 2020 | 30       | animal      | insects                                                                  | RNA | illumina    | De novo | Bunyavirales                                                          | Peribunyaviridae,                                               | Spain                          | European<br>region        | RNeasy Mini<br>Kit (Qiagen)                                                                                              | Silica<br>membrane-based                           |                                  |
| [31] | 2019 | ND       | environment | water                                                                    | DNA | illumina    | /       | cobaviruses phage                                                     | Podoviridae,                                                    | North Sea                      | America<br>region         | ChargeSwitch<br>gDNA<br>Mini Bacteria<br>Kit<br>(ThermoFisher Scientific)                                                | Magnetic<br>beads-based                            | pore<br>filtration               |
| [32] | 2010 | 3        | animal      | brain sample                                                             | RNA | Roche_454   | /       | astrovirus                                                            | Astroviridae,                                                   | Denmark                        | European<br>region        | QIAamp<br>DNA Mini<br>Kit (Qiagen) ,<br>RNeasy mini<br>kit (Qiagen)                                                      | Silica<br>membrane-based, Silica<br>membrane-based |                                  |
| [33] | 2012 | 3        | animal      | serum                                                                    | DNA | Roche_454   | /       | TTSuV1, TTSuV2,<br>Porcine parvovirus 4                               | Anelloviridae,<br>Anelloviridae,<br>Parvoviridae,               | Uganda                         | Africa region             | QIAamp<br>DNA Mini<br>Kit (Qiagen) ,                                                                                     | Silica<br>membrane-based, Silica                   |                                  |

|      |      |     |             |                    |     |           |         |                                         |                                          |                        |                        |                                                         |                                              |                     |
|------|------|-----|-------------|--------------------|-----|-----------|---------|-----------------------------------------|------------------------------------------|------------------------|------------------------|---------------------------------------------------------|----------------------------------------------|---------------------|
|      |      |     |             |                    |     |           |         |                                         |                                          |                        |                        | RNeasy mini kit (Qiagen)                                | membrane-based                               |                     |
| [34] | 2016 | 8   | animal      | lymph nodes        | RNA | Roche_454 | De novo | circoviruses                            | Circoviridae,                            | Sweden                 | European region        | QIAamp DNA Mini Kit (Qiagen) , RNeasy mini kit (Qiagen) | Silica membrane-based, Silica membrane-based |                     |
| [35] | 2019 | 180 | animal      | insects            | RNA | illumina  | De novo | Nairoviridae family                     | Bunyaviridae,                            | Brazil                 | America region         | Genjet RNA extraction kit (Thermo Fisher)               | Column-based                                 |                     |
| [36] | 2016 | ND  | plant       | leaves             | RNA | illumina  | De novo | Macluravirus                            | Potyviridae,                             | New Zealand            | South-East Asia region | beads, termo fisher                                     | Magnetic beads-based                         |                     |
| [37] | 2015 | ND  | animal      | swab samples       | DNA | Roche_454 | /       | Gammaherpesvirus                        | Herpesviridae,                           | Netherlands            | European region        | High Pure Viral Nucleic Acid kit (Roche)                | Filter tube                                  |                     |
| [38] | 2020 | 98  | animal      | oral/anal swab     | DNA | illumina  | De novo | Gemykibivirus, Papillomavirus           | Genomoviridae, Papillomaviridae          | Argentina              | America region         | /                                                       | ND                                           |                     |
| [39] | 2012 | 7   | environment | hot spring samples | RNA | Roche_454 | /       | Nodaviruses, Tetraviruses, Birnaviruses | Nodaviridae, Tetraviridae, Birnaviridae, | United States          | America region         | mirVana miRNA isolation kit                             | Column-based                                 | pore filtration     |
| [40] | 2015 | 10  | environment | hot spring samples | DNA | illumina  | /       | several                                 | /,                                       | United States          | America region         | DNA/RNA Viral Extraction Kit (Invitrogen)               | Silica membrane-based                        | ultracentrifugation |
| [41] | 2020 | ND  | environment | water              | DNA | illumina  | De novo | Yaravirus                               | Unclassified,                            | Brazil                 | America region         | /                                                       | ND                                           | ultracentrifugation |
| [42] | 2020 | 111 | animal      | fecal samples      | RNA | illumina  | /       | Sapelovirus (family Picornaviridae)     | Picornaviridae,                          | Hungary                | European region        | TRI reagent (Sigma-Aldrich)                             | Solvent-based                                |                     |
| [43] | 2017 | 717 | plant       | leaves             | DNA | Roche_454 | De novo | Mastrevirus                             | Geminiviridae,                           | Florida and Guadeloupe | America region         | /                                                       | ND                                           |                     |
| [44] | 2014 | 25  | animal      | brain sample       | RNA | illumina  | De novo | Astrovirus                              | Astroviridae,                            | Switzerland            | European region        | Nucleon Bacc2 kit (GE Healthcare), TRIzol reagents      | Solvent-based, Solvent-based                 |                     |

|      |      |     |             |                                                |             |             |         |                                                               |                                                                                                                               |                |                        |                                                                  |                       |                 |  |
|------|------|-----|-------------|------------------------------------------------|-------------|-------------|---------|---------------------------------------------------------------|-------------------------------------------------------------------------------------------------------------------------------|----------------|------------------------|------------------------------------------------------------------|-----------------------|-----------------|--|
| [45] | 2016 | 7   | animal      | Trematomus pennellii                           | DNA         | illumina    | De novo | polyomavirus                                                  | Polyomaviridae,                                                                                                               | Ross Sea       |                        | /                                                                | ND                    |                 |  |
| [46] | 2020 | 27  | animal      | fecal samples, liver, and ectoparasite samples | RNA         | illumina    | De novo | picornavirus                                                  | Picornaviridae,                                                                                                               | Australia      | South-East Asia region | RNeasy Plus Mini Kit (Qiagen)                                    | Column-based          |                 |  |
| [47] | 2013 | ND  | plant       | tomato                                         | RNA         | Roche_454   | /       | Totiviridae and Partitiviridae                                | Partiviridae,                                                                                                                 | France         | European region        | /                                                                | ND                    |                 |  |
| [48] | 2021 | 29  | animal      | spleen and lung                                | DNA         | illumina    | De novo | Anellovirus, Circovirus                                       | Anelloviridae, Circoviridae                                                                                                   | South American | America region         | TRI reagent (Sigma-Aldrich)                                      | Solvent-based         |                 |  |
| [49] | 2017 | 54  | animal      | organs and skin lesions                        | DNA         | Ion Torrent | De novo | Orthopoxvirus                                                 | Poxviridae,                                                                                                                   | Italy          | European region        | /                                                                | ND                    |                 |  |
| [50] | 2018 | 68  | environment | water                                          | DNA and RNA | illumina    | /       | Chuviridae, Yanvirus, Weivirus, Zhaovirus, Qinvirus, Yuevirus | Chuviridae, Unclassified, Unclassified, Qinviridae, Yueviridae                                                                |                |                        | NucleoSpin RNA Midi kits (Macherey-Nagel)                        | Silica membrane-based |                 |  |
| [51] | 2020 | 1   | animal      | tumor tissue                                   | DNA         | illumina    | De novo | papillomavirus                                                | Papillomaviridae,                                                                                                             | Australia      | South-East Asia region | DNeasy Blood & Tissue Kit (Qiagen)                               | Column-based          |                 |  |
| [52] | 2021 | 10  | plant       | leaves                                         | RNA         | illumina    | De novo | Iflavirus                                                     | Iflaviridae,                                                                                                                  | United States  | America region         | RNeasy Plant Mini Kit (Qiagen)                                   | Column-based          |                 |  |
| [53] | 2021 | 125 | animal      | nasopharyngeal swabs                           | RNA         | illumina    | /       | Coronavirus                                                   | Coronaviridae,                                                                                                                | /              |                        | QIAamp DNA Mini Kit (Qiagen), QIAamp viral RNA mini kit (Qiagen) | Silica membrane-based |                 |  |
| [54] | 2019 | 2   | environment | water                                          | DNA         | illumina    | /       | several                                                       | Siphoviridae, Podoviridae, Myoviridae, Adenoviridae, Herpesviridae, Phycodnaviridae, Poxviridae, Mimiviridae, Pandoraviridae, | Peru           | America region         | ZymoBIOMICS DNA kits (MoBio)                                     | Other/multiple type   | pore filtration |  |
| [55] | 2013 | 1   | animal      | fecal samples                                  | DNA         | sanger      | /       | circo-like virus                                              | Circoviridae,                                                                                                                 | Brazil         | America region         | QIAamp MinElute Virus Spin Kit (Qiagen)                          | Column-based          |                 |  |
| [56] | 2017 | 177 | environment | sewage and reclaimed water samples             | DNA         | sanger      | /       | circo-like virus                                              | Circoviridae,                                                                                                                 | Brazil         | America region         | High Pure Viral Nucleic Acid kit (Roche)                         | Filter tube           | pore filtration |  |

|      |      |      |             |                                 |             |             |         |                                                                                                                             |                                                                                                                             |                |                        |                                                  |                                |
|------|------|------|-------------|---------------------------------|-------------|-------------|---------|-----------------------------------------------------------------------------------------------------------------------------|-----------------------------------------------------------------------------------------------------------------------------|----------------|------------------------|--------------------------------------------------|--------------------------------|
| [57] | 2021 | 120  | animal      | plasma                          | DNA         | illumina    | /       | Anellovirus                                                                                                                 | Anelloviridae,                                                                                                              | Spain          | European region        | QIAamp DNA Mini Kit (Qiagen)                     | Silica membrane-based          |
| [58] | 2015 | ND   | animal      | insects                         | RNA         | illumina    | /       | narnavirus                                                                                                                  | Narnaviridae,                                                                                                               | California     | America region         | MasterPure Complete DNA and RNA Purification kit | Magnetic glass particles-based |
| [59] | 2018 | 1359 | animal      | insects                         | RNA         | Ion Torrent | De novo | Uxmal virus, Mayapan virus                                                                                                  | Unclassified,                                                                                                               | Mexico         | America region         | TRIzol reagents                                  | Solvent-based                  |
| [60] | 2013 | 6    | animal      | fecal samples                   | DNA         | Roche_454   | /       | porcine stool-associated circular virus                                                                                     | Smacoviridae,                                                                                                               | United States  | America region         | QIAamp MinEluteVirus Vacuum Kit (Qiagen)         | Other/multiple type            |
| [61] | 2016 | 540  | animal      | insects                         | RNA         | Ion Torrent | /       | Cuacua virus                                                                                                                | Flaviviridae,                                                                                                               | Mozambique     | Africa region          | TRIzol reagents                                  | Solvent-based                  |
| [62] | 2019 | 54   | animal      | fecal samples                   | DNA and RNA | illumina    | De novo | sapellovirus, astroviruses, rotaviruses, picobirnaviruses, parvoviruses, papillomaviruses, polyomaviruses, gammaherpesvirus | Picornaviridae, Astroviridae, Sedoreoviridae, Picobirnaviridae, Parvoviridae, Papillomaviridae, Polyomaviridae, Hepeviridae | Tasmania       | South-East Asia region | RNeasy Plus Mini Kit (Qiagen)                    | Column-based                   |
| [63] | 2020 | 24   | animal      | spleen, liver and bursa tissues | DNA         | illumina    | De novo | gyrovirus                                                                                                                   | Anelloviridae,                                                                                                              | Brazil         | America region         | Phenol-chloroform extraction method              | Solvent-based                  |
| [64] | 2021 | 10   | animal      | meats                           | DNA         | illumina    | /       | genomoviruses                                                                                                               | Genomoviridae,                                                                                                              | Brazil         | America region         | TRIzol reagents                                  | Solvent-based                  |
| [65] | 2019 | 144  | plant       | leaves                          | DNA         | illumina    | /       | mastrevirus                                                                                                                 | Geminiviridae,                                                                                                              | Reunion Island | European region        | DNeasy Plant DNA extraction kit (Qiagen)         | Silica membrane-based          |
| [66] | 2014 | ND   | animal      | insects                         | RNA         | illumina    | De novo | rhabdovirus, bunyavirus                                                                                                     | Rhabdoviridae, Bunyaviridae                                                                                                 | Australia      | South-East Asia region | QIAamp viral RNA mini kit (Qiagen)               | Other/multiple type            |
| [67] | 2017 | 18   | animal      | fecal samples                   | DNA and RNA | illumina    | /       | bocavirus                                                                                                                   | Parvoviridae,                                                                                                               | Portugal       | European region        | QIAamp viral RNA mini kit (Qiagen)               | Other/multiple type            |
| [68] | 2016 | 9    | environment | corals                          | DNA         | illumina    | De novo | Herpesvirus                                                                                                                 | Herpesviridae,                                                                                                              | Australia      | South-East Asia region | Formamide Procedure                              | Solvent-based                  |

|      |      |          |             |                          |             |                                              |         |                                               |                                                                                                           |           |                        |                                          |                       |                     |
|------|------|----------|-------------|--------------------------|-------------|----------------------------------------------|---------|-----------------------------------------------|-----------------------------------------------------------------------------------------------------------|-----------|------------------------|------------------------------------------|-----------------------|---------------------|
| [69] | 2019 | Database | environment | multiple ecosystems      | DNA         | Analyzes sequences obtained in other studies | De novo | several                                       | Myoviridae, Podoviridae, Siphoviridae,                                                                    | /         | /                      | ND                                       |                       |                     |
| [70] | 2018 | 37       | animal      | buccal swab              | DNA         | illumina                                     | De novo | Anellovirus, Torqueto virus                   | Anelloviridae, Anelloviridae                                                                              | Antartic  |                        | High Pure Viral Nucleic Acid kit (Roche) | Filter tube           |                     |
| [71] | 2021 | 5        | plant       | leaves                   | DNA         | illumina                                     | /       | SiLCV                                         | Geminiviridae,                                                                                            | China     | South-East Asia region | /                                        | ND                    |                     |
| [72] | 2020 | 1        | environment | water                    | DNA         | illumina                                     | De novo | PA-SR01                                       | Myoviridae,                                                                                               | Singapore | Western Pacific region | QIAamp DNA Mini Kit (Qiagen)             | Silica membrane-based | ultracentrifugation |
| [73] | 2021 | 323      | animal      | salivary glands          | RNA         | illumina                                     | De novo | several                                       | Flaviviridae, Partitiviridae, Reoviridae, Phasmaviridae, Rhabdoviridae, Orthomyxoviridae, Picornaviridae, | Brazil    | America region         | High Pure Viral RNA Kit (Roche)          | Filter tube           |                     |
| [74] | 2014 | 9        | animal      | lungs, liver and brain   | DNA and RNA | illumina                                     | De novo | nairovirus                                    | Bunyaviridae, Orthomyxoviridae                                                                            | France    | European region        | RNeasy kit (Qiagen)                      | Column-based          |                     |
| [75] | 2021 | 12       | animal      | blood                    | DNA         | illumina                                     | De novo | circovirus                                    | Circoviridae,                                                                                             | China     | South-East Asia region | QIAamp MinElute Virus Spin Kit (Qiagen)  | Column-based          |                     |
| [76] | 2021 | 4        | animal      | fecal samples            | DNA         | illumina                                     | De novo | bocaparvovirus                                | Parvoviridae,                                                                                             | China     | South-East Asia region | QIAamp MinElute Virus Spin Kit (Qiagen)  | Column-based          |                     |
| [77] | 2021 | 150      | plant       | plants                   | RNA         | illumina                                     | De novo | Umbravirus, closterovirus, tritimovirus       | Tombusviridae, Closteroviridae, Potyviridae,                                                              | France    | European region        | NucleoSpin kit (Macherey-Nagel)          | Silica membrane-based |                     |
| [78] | 2012 | 4        | plant       | leaves                   | DNA         | sanger                                       | /       | cassava associated circular DNA virus (CasCV) | Genomoviridae,                                                                                            | England   | European region        | High Pure Viral Nucleic Acid kit (Roche) | Filter tube           |                     |
| [79] | 2014 | nd       | animal      | larvae                   | DNA         | illumina                                     | /       | CRESS-DNA virus                               | ND,                                                                                                       | Ghana     | Africa region          | Extract-N-Amp (Sigma–Aldrich)            | Solvent-based         |                     |
| [80] | 2020 | 107      | plant       | leaves                   | DNA         | illumina                                     | /       | Begomovirus                                   | Geminiviridae,                                                                                            | Brazil    | America region         | solvent                                  | Solvent-based         |                     |
| [81] | 2019 | 93       | animal      | swab and cloacal samples | RNA         | illumina                                     | De novo | picornavirus                                  | Picornaviridae,                                                                                           | Antartic  |                        | QIAamp viral RNA mini kit (Qiagen)       | Other/multiple type   |                     |

|      |      |          |             |                                        |             |           |         |                                                                           |                                                                                                                                                                  |                |                 |                                                                         |                            |                            |
|------|------|----------|-------------|----------------------------------------|-------------|-----------|---------|---------------------------------------------------------------------------|------------------------------------------------------------------------------------------------------------------------------------------------------------------|----------------|-----------------|-------------------------------------------------------------------------|----------------------------|----------------------------|
| [82] | 2019 | Database | environment | sediments                              | DNA and RNA | illumina  | /       | Phages                                                                    | Fiersviridae, Fiersviridae, Microviridae, Microviridae, Cystoviridae, Siphoviridae Siphoviridae, Myoviridae, Podoviridae, Inoviridae, Microviridae, Cystoviridae | United States  | America region  | /                                                                       | ND                         | fluidic circuit            |
| [83] | 2020 | 102      | animal      | insects                                | DNA and RNA | illumina  | De novo | several                                                                   |                                                                                                                                                                  | /              |                 | RNA viral extraction kit (Qiagen)                                       | Other/multiple type        |                            |
| [84] | 2017 | 17       | animal      | venous blood, spleen, thymus, and lung | DNA         | illumina  | De novo | polyomavirus                                                              | Polyomaviridae,                                                                                                                                                  | California     | America region  | DNeasy Blood & Tissue Kit (Qiagen), QIAamp DNA FFPE Tissue Kit (Qiagen) | Column-based, Column-based |                            |
| [85] | 2014 | 1        | environment | surface water                          | DNA         | illumina  | De novo | Podovirus, siphovirus                                                     | Podoviridae, Siphoviridae                                                                                                                                        | California     | America region  | /                                                                       | ND                         | pore filtration            |
| [86] | 2018 | Database | animal      | Database, ant tissue                   | DNA         | sanger    | /       | circovirus                                                                | Circoviridae,                                                                                                                                                    | /              |                 | /                                                                       | ND                         |                            |
| [87] | 2016 | ND       | animal      | gut                                    | DNA and RNA | illumina  | De novo | chicken megrovirus, sicinivirus 1                                         | Picornaviridae, Picornaviridae                                                                                                                                   | UK             | European region | Ribopure RNA extraction kit (Life Technologies )                        | Other/multiple type        |                            |
| [88] | 2012 | 1        | environment | pore water                             | DNA and RNA | Roche_454 | /       | BSL RDHV                                                                  | Unclassified,                                                                                                                                                    | California     | America region  | Phenol-chloroform extraction method                                     | Solvent-based              | tangential flow filtration |
| [89] | 2018 | 1        | animal      | skin                                   | DNA         | illumina  | De novo | adomavirus                                                                | Adomaviridae,                                                                                                                                                    | /              |                 | QIAquick viral RNA column purification system                           | Column-based               |                            |
| [90] | 2018 | 1        | animal      | serum and liver                        | DNA         | illumina  | /       | parvovirus                                                                | Parvoviridae,                                                                                                                                                    | Nebraska (USA) | America region  | /                                                                       | ND                         |                            |
| [91] | 2015 | ND       | animal      | intestinal content samples             | RNA         | illumina  | De novo | coronavirus                                                               | Coronaviridae,                                                                                                                                                   | /              |                 | High Pure template preparation kit (Roche)                              | Filter tube                |                            |
| [92] | 2015 | ND       | animal      | mucus samples                          | DNA and RNA | illumina  | /       | Porcine astrovirus, sapovirus, Po-Circo-like virus, parvovirus, Rotavirus | Astroviridae, Caliciviridae, Circoviridae, Parvoviridae, Reoviridae,                                                                                             | Europe         | European region | Cador Qiagen Pathogen minikit (Hilden)                                  | Column-based               |                            |



|       |      |          |        |                                |             |                                              |         |                                                                    |                                                            |               |                        |                                             |                      |
|-------|------|----------|--------|--------------------------------|-------------|----------------------------------------------|---------|--------------------------------------------------------------------|------------------------------------------------------------|---------------|------------------------|---------------------------------------------|----------------------|
| [93]  | 2013 | 2        | animal | marine invertebrate species    | DNA         | sanger                                       | /       | circo-like virus                                                   | Circoviridae,                                              | Florida       | America region         | QIAamp MinElute Virus Spin Kit (Qiagen)     | Column-based         |
| [94]  | 2018 | 35       | animal | fecal samples                  | RNA         | illumina                                     | De novo | picobirnaviruses, partitivirus, Picornavirales                     | Picornaviridae, Picobirnaviridae, Partitiviridae,          | Congo         | Africa region          | QIAamp viral RNA mini kit (Qiagen)          | Other/multiple type  |
| [95]  | 2014 | Database | animal | fecal samples                  | DNA         | Analyzes sequences obtained in other studies | De novo | CRESS-DNA virus                                                    | ND,                                                        | /             |                        | /                                           | ND                   |
| [96]  | 2019 | 1        | animal | Cerebrospinal fluid and plasma | RNA         | illumina                                     | /       | orthobunyavirus                                                    | Peribunyaviridae,                                          | Uganda        | Africa region          | Phenol-chloroform extraction method         | Solvent-based        |
| [97]  | 2019 | 190      | animal | cerebrospinal fluid            | DNA         | illumina                                     | /       | betatorquevirus                                                    | Anelloviridae,                                             | Ghana         | Africa region          | MagMAX Viral RNA Isolation kit              | Magnetic beads-based |
| [98]  | 2018 | 12       | animal | serum                          | RNA         | illumina                                     | De novo | Jingmen tick virus                                                 | Flaviviridae,                                              | Kosovo        | European region        | QIAseq FX DNA Library Kit (Qiagen)          | Magnetic beads-based |
| [99]  | 2013 | ND       | animal | bats tissues                   | DNA and RNA | illumina                                     | /       | adenovirus, bocavirus, picobirnavirus, parvovirus                  | Adenoviridae, Parvoviridae, Picobirnaviridae, Parvoviridae | China         | South-East Asia region | /                                           | ND                   |
| [100] | 2019 | 9        | animal | fecal samples                  | DNA         | illumina                                     | De novo | Chapparvovirus                                                     | Parvoviridae,                                              | Colorado      | America region         | MagMAX Viral RNA Isolation kit              | Magnetic beads-based |
| [101] | 2020 | 781      | animal | plasma                         | DNA         | illumina                                     | /       | parvovirus and densovirus                                          | Parvoviridae, Parvoviridae                                 | Brazil        | America region         | MagMAX Viral RNA Isolation kit              | Magnetic beads-based |
| [102] | 2020 | 652      | animal | insects                        | DNA and RNA | illumina                                     | De novo | Flaviviridae, Rhabdoviridae, Totiviridae, and Iflaviridae families | Flaviviridae, Rhabdoviridae, Iflaviridae, Totiviridae      | Japan         | South-East Asia region | Isogen II (Nippon Gene)                     | Solvent-based        |
| [103] | 2016 | 464      | animal | insects                        | RNA         | illumina                                     | /       | flavivirus, BOAV, GAMV, AToV                                       | Flaviviridae, Totiviridae                                  | Senegal       | Africa region          | Mag-Bind Viral DNA/RNA kit (Omega)          | Magnetic beads-based |
| [104] | 2021 | 23       | animal | fecal samples                  | DNA         | Ion Torrent                                  | De novo | CRESS-DNA virus                                                    | ND,                                                        | Hungary       | European region        | Direct-zol RNA Miniprep kit (Zymo Research) | Column-based         |
| [105] | 2021 | ND       | plant  | plants                         | DNA         | sanger                                       | /       | Genomovirus                                                        | Genomoviridae,                                             | United States | America region         | PureLink Microbiome DNA purification        | Column-based         |

|       |      |     |             |                       |                |           |         |                                                                     |                                                        |                                                               |                    | kit<br>(Invitrogen)                                        |                              |                          |
|-------|------|-----|-------------|-----------------------|----------------|-----------|---------|---------------------------------------------------------------------|--------------------------------------------------------|---------------------------------------------------------------|--------------------|------------------------------------------------------------|------------------------------|--------------------------|
| [106] | 2017 | 28  | environment | leaves                | RNA            | illumina  | De novo | Picornaviruses,<br>hepeviruses                                      | Picornaviridae,<br>Hepeviridae                         | Spain                                                         | European<br>region | QIAamp<br>viral RNA<br>mini kit<br>(Qiagen)                | Other/multip<br>le type      | chemical<br>flocculation |
| [107] | 2019 | 406 | animal      | cloacal swabs         | RNA            | illumina  | De novo | astrovirus                                                          | Astroviridae,                                          | French<br>Guiana                                              | America<br>region  | MagMAX<br>Viral<br>RNA<br>Isolation kit                    | Magnetic<br>beads-based      |                          |
| [108] | 2020 | 35  | animal      | liver, skin,<br>gills | DNA and<br>RNA | illumina  | De novo | Betanodaviruses,<br>hepadnaviruses,<br>Rhinovirus A                 | Nodaviridae,<br>Hepadnaviridae,<br>Picornaviridae,     | Portugal                                                      | European<br>region | NZYol<br>(NZYTech)                                         | Solvent-<br>based            |                          |
| [109] | 2015 | ND  | plant       | plants                | RNA            | sanger    | /       | Potyvirus                                                           | Potyviridae,                                           | France                                                        | European<br>region | RNeasy Plant<br>Mini Kit<br>(Qiagen)                       | Column-<br>based             |                          |
| [110] | 2018 | 214 | plant       | leaves                | DNA and<br>RNA | Roche_454 | De novo | Chrysovirus and<br>Umbravirus.                                      | Chrysoviridae,<br>Tombusviridae                        | Florida                                                       | America<br>region  | NucleoSpin<br>96 Virus<br>Core Kit<br>(Macherey-<br>Nagel) | Silica<br>membrane-<br>based |                          |
| [111] | 2021 | 36  | animal      | fecal samples         | DNA            | illumina  | /       | Siphoviridae,<br>Myoviridae,<br>Podoviridae, crAss-<br>like viruses | Siphoviridae, Myoviridae,<br>Podoviridae, /            | Ireland                                                       | European<br>region | /                                                          | ND                           |                          |
| [112] | 2018 | 20  | plant       | leaves                | DNA            | illumina  | De novo | mastrevirus                                                         | Geminiviridae,                                         | Brazil                                                        | America<br>region  | ZR Viral<br>DNA/RNA<br>Kit (Zymo<br>Research)              | Other/multip<br>le type      |                          |
| [113] | 2019 | 2   | animal      | fecal samples         | DNA            | illumina  | De novo | cyclovirus                                                          | Circoviridae,                                          | Brazil                                                        | America<br>region  | ZR Viral<br>DNA/RNA<br>Kit (Zymo<br>Research)              | Other/multip<br>le type      |                          |
| [114] | 2021 | 13  | environment | sediments             | DNA            | illumina  | /       | Haloviruses                                                         | Unclassified,                                          | Spain                                                         | European<br>region | /                                                          | ND                           |                          |
| [115] | 2019 | 200 | animal      | insects               | DNA            | illumina  | De novo | densovirus                                                          | Parvoviridae,                                          | France,<br>Greece,<br>Netherlands,<br>Belgium and<br>Portugal | European<br>region | NucleoSpin<br>96 Virus<br>Core Kit<br>(Macherey-<br>Nagel) | Silica<br>membrane-<br>based |                          |
| [116] | 2021 | 16  | animal      | insects               | RNA            | illumina  | De novo | HpaAV, HpaAV1,<br>HpaAV2                                            | Alphaflexiviridae,<br>Iflaviridae, Iflaviridae,        | France                                                        | European<br>region | Wizard DNA<br>purification<br>kit (Promega)                | Solvent-<br>based            |                          |
| [117] | 2016 | 378 | animal      | insects               | RNA            | illumina  | De novo | several                                                             | Bunyaviridae,<br>Orthomyxoviridae,<br>Dicistroviridae, | United States                                                 | America<br>region  | QIAamp<br>viral RNA<br>mini kit<br>(Qiagen)                | Other/multip<br>le type      |                          |

|       |      |          |             |                                     |             |          |         |                                                                                                                     |                                                                                                                                                                 |           |                        |                                            |                       |                                                 |
|-------|------|----------|-------------|-------------------------------------|-------------|----------|---------|---------------------------------------------------------------------------------------------------------------------|-----------------------------------------------------------------------------------------------------------------------------------------------------------------|-----------|------------------------|--------------------------------------------|-----------------------|-------------------------------------------------|
| [118] | 2021 | 12       | animal      | oral, throat, and anal swab samples | RNA         | illumina | /       | Picornavirus                                                                                                        | Picornaviridae,                                                                                                                                                 | China     | South-East Asia region | QIAamp viral RNA mini kit (Qiagen)         | Other/multiple type   |                                                 |
| [119] | 2017 | 1        | animal      | fecal samples                       | RNA         | illumina | De novo | Camula virus                                                                                                        | Unclassified,                                                                                                                                                   | /         |                        | /                                          | ND                    |                                                 |
| [120] | 2018 | 37       | animal      | insects                             | DNA and RNA | illumina | De novo | Dicistro-like virus, Seco-like virus, Noda-like virus, Tymo-like virus, ARV-1, Partiti-like virus, Circo-like virus | Dicistroviridae, Secoviridae, Nodaviridae, Tymoviridae, Rhabdoviridae, Partitiviridae, Circoviridae,                                                            | Several   |                        | MagMAX Viral Isolation Kit (Thermo-Fisher) | Magnetic beads-based  |                                                 |
| [121] | 2018 | ND       | plant       | plants                              | DNA         | sanger   | De novo | nanoviruses                                                                                                         | Nanoviridae,                                                                                                                                                    | France    | European region        | DNeasy Plant Mini Kit (Qiagen)             | Column-based          |                                                 |
| [122] | 2013 | 4        | environment | water                               | DNA         | illumina | De novo | myoviruses                                                                                                          | Myoviridae,                                                                                                                                                     | China     | South-East Asia region | QIAamp viral RNA kit (Qiagen)              | Silica membrane-based | ultracentrifugation, tangential flow filtration |
| [123] | 2021 | 230      | animal      | Dead fish                           | DNA and RNA | illumina | De novo | several                                                                                                             | Hantaviridae, Paramyxoviridae, Arenaviridae, Flaviviridae, Filoviridae, Hepadnaviridae, Rhabdoviridae, Matonaviridae, Picornaviridae, Reoviridae, Astroviridae, | Australia | South-East Asia region | RNeasy Plus Mini Kit (Qiagen)              | Column-based          |                                                 |
| [124] | 2016 | 10       | environment | surface water                       | DNA         | illumina | /       | DSLVs                                                                                                               | Phycodnaviridae,                                                                                                                                                | China     | South-East Asia region | QIAamp Fast DNA Stool Mini Kit (Qiagen)    | Silica membrane-based | pore filtration                                 |
| [125] | 2017 | 42       | animal      | serum                               | DNA         | illumina | De novo | anellovirus                                                                                                         | Anelloviridae,                                                                                                                                                  | Spain     | European region        | QIAamp viral RNA mini kit (Qiagen)         | Other/multiple type   |                                                 |
| [126] | 2018 | 3        | environment | microbial mats                      | DNA         | illumina | /       | T7-related virus                                                                                                    | Podoviridae,                                                                                                                                                    | Patagonia | America region         | /                                          | ND                    | tangential flow filtration                      |
| [127] | 2020 | 1        | environment | raw sewage                          | RNA         | illumina | /       | Picobirnaviridae                                                                                                    | Picobirnaviridae,                                                                                                                                               | Chile     | America region         | High Pure Viral RNA Kit (Roche)            | Filter tube           | ultrafiltration / ultracentrifugation           |
| [128] | 2020 | Database | environment | wastewater                          | DNA         | illumina | /       | virophage                                                                                                           | ND,                                                                                                                                                             | New York  | America region         | PowerSoil DNA Isolation kit (MO BIO)       | Silica membrane-based |                                                 |

|       |      |      |             |                                                                                             |     |           |         |                                 |                   |             |                        |                                                                       |                                              |                       |
|-------|------|------|-------------|---------------------------------------------------------------------------------------------|-----|-----------|---------|---------------------------------|-------------------|-------------|------------------------|-----------------------------------------------------------------------|----------------------------------------------|-----------------------|
| [129] | 2017 | 37   | animal      | fecal samples                                                                               | DNA | illumina  | De novo | Microviridae                    | Microviridae,     | China       | South-East Asia region | QIAamp viral RNA mini kit (Qiagen)                                    | Other/multiple type                          |                       |
| [130] | 2021 | 696  | animal      | blood and fecal samples                                                                     | DNA | illumina  | De novo | Anellovirus                     | Anelloviridae,    | China       | South-East Asia region | /                                                                     | ND                                           |                       |
| [131] | 2015 | 5    | animal      | chicken proventriculus                                                                      | RNA | illumina  | /       | picornavirus                    | Picornaviridae,   | South Korea | South-East Asia region | Viral Gene-spin Viral DNA/RNA Extraction Kit (iNtRON Biotechnology)   | Column-based                                 |                       |
| [132] | 2019 | 1795 | animal      | fecal samples, blood, oral secretion, nasal secretion, genital secretions, skin swab, water | DNA | illumina  | De novo | Microviridie                    | Microviridae,     | China       | South-East Asia region | QIAamp MinElute Virus Spin Kit (Qiagen)                               | Column-based                                 |                       |
| [133] | 2020 | 26   | environment | wastewater                                                                                  | RNA | illumina  | De novo | Epatitis E virus                | Hepeviridae,      | Sweden      | European region        | DNeasy Blood & Tissue Kit (Qiagen)                                    | Column-based                                 | chemical flocculation |
| [134] | 2016 | 1    | animal      | pericardial fluid                                                                           | DNA | Roche_454 | /       | gemycircularviruses             | Genomoviridae,    | France      | European region        | /                                                                     | ND                                           |                       |
| [135] | 2014 | 4    | animal      | fecal samples                                                                               | RNA | illumina  | De novo | alphacoronavirus                | Coronaviridae,    | New Zealand | South-East Asia region | iPrep PureLink Virus Kit (Life Technologies)                          | Other/multiple type                          |                       |
| [136] | 2020 | 91   | animal      | fecal samples                                                                               | RNA | illumina  | De novo | Picornavirales                  | Picornaviridae,   | China       | South-East Asia region | QIAamp viral RNA mini kit (Qiagen)                                    | Other/multiple type                          |                       |
| [137] | 2015 | 10   | animal      | fecal samples                                                                               | DNA | illumina  | /       | papillomavirus, CRESS-DNA virus | Papillomaviridae, | Malaysia    | South-East Asia region | QIAamp DNA Stool kit (Qiagen), QIAamp DNA Mini and Blood kit (Qiagen) | Silica membrane-based, Silica membrane-based |                       |
| [138] | 2016 | 36   | animal      | fecal samples                                                                               | DNA | illumina  | De novo | parvovirus                      | Parvoviridae,     | Hungary     | European region        | QIAamp spin-column (Qiagen)                                           | Column-based                                 |                       |

|       |      |     |             |                    |             |             |         |                                                                       |                                                                                                                                                 |                 |                        |                                                        |                       |                     |
|-------|------|-----|-------------|--------------------|-------------|-------------|---------|-----------------------------------------------------------------------|-------------------------------------------------------------------------------------------------------------------------------------------------|-----------------|------------------------|--------------------------------------------------------|-----------------------|---------------------|
| [139] | 2021 | 11  | animal      | fecal samples      | DNA         | illumina    | De novo | Parvovirus                                                            | Parvoviridae,                                                                                                                                   | Hungary         | European region        | QIAamp viral RNA mini kit (Qiagen)                     | Other/multiple type   |                     |
| [140] | 2021 | 75  | animal      | fecal samples      | RNA         | illumina    | /       | Picornavirus                                                          | Picornaviridae,                                                                                                                                 | Hungary         | European region        | MagMAX Viral RNA Isolation kit                         | Magnetic beads-based  |                     |
| [141] | 2019 | 146 | animal      | insects            | RNA         | illumina    | De novo | several                                                               | Chuviridae, Orthomyxoviridae, Picornaviridae, Flaviviridae, Narnaviridae, Luteoviridae, Virgaviridae, Reoviridae, Phenuiviridae, Partitiviridae | New South Wales | America region         | RNeasy Plus Mini Kit (Qiagen)                          | Column-based          |                     |
| [142] | 2021 | 76  | animal      | fecal samples      | RNA         | Ion Torrent | De novo | Picornavirus                                                          | Picornaviridae,                                                                                                                                 | Chile           | America region         | TRI reagent (Sigma-Aldrich)                            | Solvent-based         |                     |
| [143] | 2013 | 853 | animal      | thorax and abdomen | DNA and RNA | illumina    | De novo | Mamastrovirus, Bocavirus, Circovirus, Iflavirus and Orthohepadnavirus | Astroviridae, Circoviridae, Parvoviridae, Flaviviridae, Iflaviridae,                                                                            | China           | South-East Asia region | TRIzol reagents                                        | Solvent-based         |                     |
| [144] | 2013 | 78  | animal      | guts and lungs     | RNA         | illumina    | /       | rotavirus                                                             | Reoviridae,                                                                                                                                     | China           | South-East Asia region | RNeasy Mini Kit (Qiagen)                               | Silica membrane-based |                     |
| [145] | 2018 | 39  | plant       | leaves             | RNA         | illumina    | De novo | GRSPaV                                                                | Betaflexiviridae,                                                                                                                               | France          | European region        | RNeasy Plant Mini Kit (Qiagen)                         | Column-based          |                     |
| [146] | 2016 | 1   | environment | hot spring samples | DNA         | illumina    | /       | Acidianus tailed spindle virus (ATSV)                                 | Bicaudaviridae,                                                                                                                                 | Australia       | South-East Asia region | PureLink Viral DNA and RNA extraction kit (Invitrogen) | Column-based          | ultracentrifugation |
| [147] | 2014 | 579 | animal      | fecal samples      | DNA and RNA | Roche_454   | /       | adenoviridae and Picornaviridae                                       | Adenoviridae, Picornaviridae                                                                                                                    | Australia       | South-East Asia region | Ampliprep DNA extraction machine (Roche)               | Magnetic beads-based  |                     |
| [148] | 2018 | 90  | animal      | fecal samples      | DNA         | illumina    | De novo | adenovirus                                                            | Adenoviridae,                                                                                                                                   | Bangladesh      | Western Pacific region | /                                                      | ND                    |                     |
| [149] | 2021 | 5   | animal      | plasma             | DNA         | illumina    | /       | Circovirus                                                            | Circoviridae,                                                                                                                                   | Kentucky        | America region         | /                                                      | ND                    |                     |

|       |      |     |             |                                        |     |               |         |                                        |                             |                |                        |                                                                |                            |                                       |
|-------|------|-----|-------------|----------------------------------------|-----|---------------|---------|----------------------------------------|-----------------------------|----------------|------------------------|----------------------------------------------------------------|----------------------------|---------------------------------------|
| [150] | 2020 | 1   | animal      | heart, liver, spleen, lung, and kidney | DNA | Not available | De novo | bocaparvovirus                         | Parvoviridae,               | China          | South-East Asia region | QIAamp MinElute Virus Spin Kit (Qiagen)                        | Column-based               |                                       |
| [151] | 2021 | 5   | animal      | blood                                  | DNA | illumina      | De novo | Anellovirus                            | Anelloviridae,              | China          | South-East Asia region | QIAamp viral RNA mini kit (Qiagen)                             | Other/multiple type        |                                       |
| [152] | 2016 | ND  | animal      | marine invertebrate species            | DNA | illumina      | /       | CRESS-DNA virus                        | ND,                         | Several        |                        | /                                                              | ND                         |                                       |
| [153] | 2020 | 6   | animal      | pyloric caeca and body wall tissue     | DNA | illumina      | De novo | AfaDV                                  | Parvoviridae,               | Atlantic Ocean |                        | Viral DNA kit (Zymo Research)                                  | Column-based               |                                       |
| [154] | 2019 | 6   | plant       | Mangrove soil samples                  | DNA | illumina      | De novo | Caudovirales phage                     | Podoviridae,                | China          | South-East Asia region | /                                                              | ND                         |                                       |
| [155] | 2020 | 3   | plant       | fruits                                 | RNA | illumina      | De novo | Monilinia umbra-like virus 1 (MULV1)   | Tombusviridae,              | South Korea    | South-East Asia region | DNeasy Plant Mini Kit (Qiagen), RNeasy Plant Mini Kit (Qiagen) | Column-based, Column-based |                                       |
| [156] | 2019 | 3   | environment | Groundwater                            | DNA | illumina      | /       | Myoviridae and Siphoviridae            | Siphoviridae, Myoviridae    | Germany        | European region        | /                                                              | ND                         | ultrafiltration / ultracentrifugation |
| [157] | 2015 | 87  | animal      | blood                                  | RNA | illumina      | De novo | Simian pegivirus, simian anelloviruses | Flaviviridae, Anelloviridae | Several        |                        | Maxwell 16 viral total nucleic acid purification kit (Promega) | Magnetic beads-based       |                                       |
| [158] | 2019 | 48  | animal      | fecal samples                          | RNA | illumina      | /       | sapovirus                              | Caliciviridae,              | Japan          | South-East Asia region | TRIzol reagents                                                | Solvent-based              |                                       |
| [159] | 2019 | 164 | animal      | fecal samples                          | RNA | illumina      | /       | astrovirus                             | Astroviridae,               | Switzerland    | European region        | QIAamp viral RNA mini kit (Qiagen)                             | Other/multiple type        |                                       |
| [160] | 2015 | ND  | animal      | fecal samples                          | DNA | Ion Torrent   | /       | Parvovirus                             | Parvoviridae,               | Hungary        | European region        | GeneJet Viral DNA and RNA Purification Kit (Thermo Fisher)     | Silica membrane-based      |                                       |
| [161] | 2017 | 105 | plant       | leaves                                 | RNA | illumina      | De novo | Ilarvirus-like                         | Bromoviridae,               | Australia      | South-East Asia region | RNeasy Plant Mini Kit (Qiagen)                                 | Column-based               |                                       |

|       |      |      |             |                                   |             |           |         |                                       |                                                |               |                        |                                                                                       |                                           |
|-------|------|------|-------------|-----------------------------------|-------------|-----------|---------|---------------------------------------|------------------------------------------------|---------------|------------------------|---------------------------------------------------------------------------------------|-------------------------------------------|
| [162] | 2018 | ND   | animal      | fecal samples                     | RNA         | Roche_454 | De novo | calicivirus                           | Caliciviridae,                                 | United States | America region         | /                                                                                     | ND                                        |
| [163] | 2021 | ND   | environment | water                             | DNA         | illumina  | De novo | several                               | Microviridae, Inoviridae                       | Tennessee     | America region         | /                                                                                     | ND                                        |
| [164] | 2017 | 1351 | animal      | blood                             | DNA         | illumina  | De novo | torquo teno virus                     | Anelloviridae,                                 | /             |                        | QIAamp Circulating Nucleic Acid Kit (Qiagen) High Pure Viral Nucleic Acid kit (Roche) | Silica membrane-based                     |
| [165] | 2019 | 40   | animal      | brain and hemolymph               | DNA         | illumina  | De novo | genomoviruses and microvirus          | Microviridae, Genomoviridae                    | Arizona       | America region         | High Pure Viral Nucleic Acid kit (Roche)                                              | Filter tube                               |
| [166] | 2019 | 40   | animal      | insects                           | DNA         | illumina  | /       | genomoviruses, microvirus, circovirus | Microviridae, Genomoviridae, Circoviridae,     | New Zealand   | South-East Asia region | High Pure Viral Nucleic Acid kit (Roche)                                              | Filter tube                               |
| [167] | 2019 | ND   | animal      | intestinal sample                 | DNA         | illumina  | De novo | bocaparvovirus                        | Parvoviridae,                                  | United States | America region         | /                                                                                     | ND                                        |
| [168] | 2010 | 5    | animal      | fecal samples                     | DNA and RNA | Roche_454 | /       | several                               | Circoviridae, Picornaviridae, Dicistroviridae, | California    | America region         | QIAamp viral RNA mini kit (Qiagen)                                                    | Other/multiple type                       |
| [169] | 2013 | 32   | animal      | brain sample                      | RNA         | illumina  | De novo | BoAstV-NeuroS1                        | Astroviridae,                                  | California    | America region         | Agencourt Formapure Kit                                                               | Magnetic beads-based                      |
| [170] | 2015 | 34   | animal      | plasma, nasal swab, fecal samples | DNA and RNA | illumina  | De novo | parvovirus, cyclovirus, kirkovirus    | Parvoviridae, Circoviridae, Circoviridae,      | United States | America region         | QIAamp viral RNA mini kit (Qiagen), MagMAX Viral RNA Isolation kit                    | Other/multiple type, Magnetic beads-based |
| [171] | 2011 | 18   | animal      | fecal samples                     | RNA         | Roche_454 | De novo | kobuvirus and sapovirus               | Caliciviridae, Picornaviridae                  | California    | America region         | QIAamp viral RNA mini kit (Qiagen)                                                    | Other/multiple type                       |
| [172] | 2011 | 10   | animal      | spleen, heart and lung tissues    | DNA         | sanger    | /       | amdovirus                             | Parvoviridae,                                  | California    | America region         | /                                                                                     | ND                                        |
| [173] | 2017 | 368  | animal      | nasopharyngeal aspirates          | RNA         | illumina  | /       | HPIV 3                                | Paramyxoviridae,                               | China         | South-East Asia region | NucliSens easyMAG system (bioMérieux)                                                 | Other/multiple type                       |

|       |      |      |        |                            |     |                                              |         |                             |                                    |          |                        |                                                      |                              |
|-------|------|------|--------|----------------------------|-----|----------------------------------------------|---------|-----------------------------|------------------------------------|----------|------------------------|------------------------------------------------------|------------------------------|
| [174] | 2021 | ND   | animal | insects                    | RNA | illumina                                     | De novo | Negevirus                   | Unclassified,                      | Kenya    | Africa region          | QIAamp viral RNA mini kit (Qiagen)                   | Other/multiple type          |
| [175] | 2013 | 7    | animal | plasma                     | DNA | illumina                                     | De novo | circovirus                  | Circoviridae,                      | Canada   | America region         | QIAamp viral RNA mini kit (Qiagen)                   | Other/multiple type          |
| [176] | 2021 | 7    | animal | fecal samples              | RNA | illumina                                     | De novo | alphacoronavirus            | Coronaviridae,                     | Denmark  | European region        | MagNA Pure 96 system (Roche)                         | Magnetic beads-based         |
| [177] | 2018 | ND   | animal | insects                    | DNA | illumina                                     | De novo | NV11X, NG24X                | ND,                                | /        |                        | QIAamp MinElute Virus Spin Kit (Qiagen)              | Column-based                 |
| [178] | 2019 | 48   | animal | insects                    | RNA | illumina                                     | De novo | VOV1, VDV4                  | Orthomyxoviridae, Orthomyxoviridae | Thailand | Western Pacific region | TRI reagent (Sigma-Aldrich)                          | Solvent-based                |
| [179] | 2014 | 15   | animal | intestinal content samples | RNA | illumina                                     | /       | coronavirus                 | Coronaviridae,                     | France   | European region        | /                                                    | ND                           |
| [180] | 2019 | 70   | animal | fecal samples              | DNA | illumina                                     | De novo | Calcivirus, cress-DNA virus | Caliciviridae, /                   | Brazil   | America region         | TRIzol reagents, phenol-chloroform extraction method | Solvent-based, Solvent-based |
| [181] | 2019 | 80   | animal | genital tract secretion    | DNA | illumina                                     | De novo | papillomavirus              | Papillomaviridae,                  | China    | South-East Asia region | QIAamp MinElute Virus Spin Kit (Qiagen)              | Column-based                 |
| [182] | 2016 | 88   | animal | vaginal swab               | DNA | illumina                                     | /       | papillomavirus              | Papillomaviridae,                  | China    | South-East Asia region | QIAamp viral RNA mini kit (Qiagen)                   | Other/multiple type          |
| [183] | 2019 | 10   | animal | fecal samples              | DNA | illumina                                     | De novo | Smacovirus                  | Smacoviridae,                      | Brazil   | America region         | High Pure Viral Nucleic Acid kit (Roche)             | Filter tube                  |
| [184] | 2018 | 145  | animal | fecal samples              | DNA | Analyzes sequences obtained in other studies | /       | CRESS-DNA virus             | ND,                                | China    | South-East Asia region | /                                                    | ND                           |
| [185] | 2019 | 1200 | plant  | plants                     | RNA | illumina                                     | De novo | Several                     | Endornaviridae,                    | France   | European region        | /                                                    | ND                           |
| [186] | 2020 | 170  | plant  | leaves                     | RNA | illumina                                     | De novo | Ilarvirus                   | Bromoviridae,                      | /        |                        | /                                                    | ND                           |



|       |      |      |             |                                        |     |             |         |                                                                                                                                                |                                                                                                |                   |                        |                                                                        |                       |                            |
|-------|------|------|-------------|----------------------------------------|-----|-------------|---------|------------------------------------------------------------------------------------------------------------------------------------------------|------------------------------------------------------------------------------------------------|-------------------|------------------------|------------------------------------------------------------------------|-----------------------|----------------------------|
| [187] | 2019 | 20   | animal      | fecal samples                          | RNA | illumina    | /       | cardiovirus                                                                                                                                    | Picornaviridae,                                                                                | China             | South-East Asia region | QIAamp viral RNA mini kit (Qiagen)                                     | Other/multiple type   |                            |
| [188] | 2019 | 1657 | animal      | salivary glands                        | RNA | illumina    | De novo | Pirizal iflavirus, Furrundu phlebovirus, Pixé Guampa vesiculovirus, Chacororé flavivirus, Rasqueado orbivirus, Uru chuvirus, Bororo circovirus | Iflaviridae, Flaviviridae, Phenuiviridae, Rhabdoviridae, Chuviridae, Reoviridae, Circoviridae, | Brazil            | America region         | High Pure Viral RNA Kit (Roche)                                        | Filter tube           |                            |
| [189] | 2014 | 5    | animal      | fecal samples                          | RNA | illumina    | De novo | rotavirus                                                                                                                                      | Reoviridae,                                                                                    | Japan             | South-East Asia region | ISGEN LS (NipponGene)                                                  | Solvent-based         |                            |
| [190] | 2018 | 107  | animal      | fecal samples                          | RNA | illumina    | /       | picornavirus                                                                                                                                   | Picornaviridae,                                                                                | Japan             | South-East Asia region | /                                                                      | ND                    |                            |
| [191] | 2015 | 63   | animal      | fecal samples                          | RNA | Ion Torrent | De novo | rotavirus                                                                                                                                      | Reoviridae,                                                                                    | Hungary           | European region        | /                                                                      | ND                    |                            |
| [192] | 2013 | 1    | animal      | fecal samples                          | DNA | illumina    | /       | microviridae                                                                                                                                   | Microviridae,                                                                                  | Pennsylvania      | America region         | QIAamp DNA Stool kit (Qiagen)                                          | Silica membrane-based |                            |
| [193] | 2016 | 6    | environment | seawater                               | RNA | Roche_454   | /       | picornavirus                                                                                                                                   | Picornaviridae,                                                                                | Antartic          |                        | MasterPure Complete DNA and RNA Purification kit                       | Solvent-based         | tangential flow filtration |
| [194] | 2021 | 10   | animal      | bronchoalveolar lavage                 | RNA | illumina    | /       | Rhinovirus                                                                                                                                     | Picornaviridae,                                                                                | Australia         | South-East Asia region | /                                                                      | ND                    |                            |
| [195] | 2013 | 1    | environment | Mediterranean deep chlorophyll maximum | DNA | illumina    | De novo | Phages                                                                                                                                         | Podoviridae,                                                                                   | Spain             | European region        | Phenol-chloroform extraction method QIAprep Spin Miniprep kit (Qiagen) | Solvent-based         | pore filtration            |
| [196] | 2016 | 12   | environment | seawater                               | DNA | illumina    | De novo | UvDeep viruses                                                                                                                                 | Phycodnaviridae, Iridoviridae                                                                  | Mediterranean Sea | European region        |                                                                        | Column-based          | pore filtration            |
| [197] | 2017 | 1    | animal      | cutaneous malignant melanoma           | DNA | illumina    | De novo | cutavirus                                                                                                                                      | Parvoviridae,                                                                                  | Brazil            | American region        | /                                                                      | ND                    |                            |

|       |      |          |             |                            |             |                                              |         |                                                                                                                                     |                                                                                                   |         |                        |                                                       |                       |                     |
|-------|------|----------|-------------|----------------------------|-------------|----------------------------------------------|---------|-------------------------------------------------------------------------------------------------------------------------------------|---------------------------------------------------------------------------------------------------|---------|------------------------|-------------------------------------------------------|-----------------------|---------------------|
| [198] | 2020 | 3        | environment | soil and water             | DNA         | illumina                                     | /       | Methanosarcina virus MV (MetMV)                                                                                                     | Unclassified,                                                                                     | Hungary | European region        | PowerSoil Max kit (MO BIO)                            | Silica membrane-based |                     |
| [199] | 2016 | 2236     | animal      | insects                    | RNA         | illumina                                     | De novo | Nairovirus and Phlebovirus                                                                                                          | Bunyaviridae, Bunyaviridae                                                                        | France  | European region        | Nucleospin RNA II kit (Macherey-Nagel)                | Silica membrane-based |                     |
| [200] | 2014 | 153      | environment | planktonic organisms       | DNA         | Roche_454                                    | /       | mimiviridae                                                                                                                         | Mimiviridae,                                                                                      | /       |                        | /                                                     | ND                    | pore filtration     |
| [201] | 2019 | 6        | animal      | fecal samples              | DNA         | illumina                                     | De novo | crane-associated adenovirus 1 (CrAdV-1)                                                                                             | Adenoviridae,                                                                                     | Japan   | South-East Asia region | QIAamp DNA Stool kit (Qiagen)                         | Silica membrane-based |                     |
| [202] | 2016 | Database | plant       | non-angiosperm green plant | RNA         | Analyzes sequences obtained in other studies | /       | alphapartitivirus                                                                                                                   | Partitiviridae,                                                                                   | /       |                        | /                                                     | ND                    |                     |
| [203] | 2015 | 50       | animal      | fecal samples              | RNA         | illumina                                     | De novo | picornavirus                                                                                                                        | Picornaviridae,                                                                                   | Japan   | South-East Asia region | TRIzol reagents                                       | Solvent-based         |                     |
| [204] | 2016 | 1        | animal      | fecal samples              | RNA         | illumina                                     | De novo | picornavirus                                                                                                                        | Picornaviridae,                                                                                   | Japan   | South-East Asia region | TRIzol reagents                                       | Solvent-based         |                     |
| [205] | 2021 | 4265     | animal      | insects                    | DNA and RNA | illumina                                     | /       | several                                                                                                                             | Rhabdoviridae, Totiviridae, Iflaviviridae, Circoviridae, Sobemoviridae,                           | France  | European region        | High pure viral nucleic acid large volume kit (Roche) | Column-based          |                     |
| [206] | 2018 | 33       | plant       | leaves                     | RNA         | illumina                                     | De novo | alfalfa virus F                                                                                                                     | Tymoviridae,                                                                                      | France  | European region        | TRIzol reagents                                       | Solvent-based         |                     |
| [207] | 2020 | 60       | plant       | leaves                     | RNA         | illumina                                     | De novo | HDaV1, HDaV2                                                                                                                        | Picornaviridae,                                                                                   | Brazil  | America region         | TRIzol reagents                                       | Solvent-based         |                     |
| [208] | 2017 | 9        | environment | water                      | DNA         | illumina                                     | De novo | Haloviruses, T4-like myoviruses, podoviruses, siphovirus, dwarf myoviruse, Synechococcus phage S-EIV1, Prochlorococcus phage P-RSP2 | Unclassified, Myoviridae, Podoviridae, Siphoviridae, Myoviridae, Unclassified, Autographiviridae, | Japan   | South-East Asia region | /                                                     | ND                    | FeCl3 precipitation |
| [209] | 2015 | ND       | animal      | insects                    | DNA         | illumina                                     | De novo | Diaphorina citri densovirus                                                                                                         | Parvoviridae,                                                                                     | Florida | America region         | TRIzol reagents                                       | Solvent-based         |                     |

|       |      |     |             |                            |     |                      |         |                                     |                                                                                                                                                     |               |                        |                                                       |                       |                 |
|-------|------|-----|-------------|----------------------------|-----|----------------------|---------|-------------------------------------|-----------------------------------------------------------------------------------------------------------------------------------------------------|---------------|------------------------|-------------------------------------------------------|-----------------------|-----------------|
| [210] | 2018 | 222 | animal      | fecal samples              | RNA | illumina             | De novo | Teschovirus A-related virus         | Picornaviridae,                                                                                                                                     | Japan         | South-East Asia region | NEBNext Ultra RNA Library Prep Kit for Illumina (NEB) | Magnetic beads-based  |                 |
| [211] | 2016 | 13  | environment | surface water              | DNA | Roche_454 and Sanger | /       | phycodnaviruses                     | Phycodnaviridae,                                                                                                                                    | Tibet         | South-East Asia region | /                                                     | ND                    | pore filtration |
| [212] | 2019 | 953 | animal      | insects                    | RNA | Ion Torrent          | De novo | several                             | Iflaviridae, Nodaviridae, Orthomyxoviridae, Partitviridae, Peribunyaviridae, Phasmaviridae, Reoviridae, Rhabdoviridae, Solemoviridae, Tombusviridae | Sweden        | European region        | TRIzol reagents                                       | Solvent-based         |                 |
| [213] | 2018 | 76  | animal      | insects                    | RNA | illumina             | De novo | flavivirus                          | Flaviviridae,                                                                                                                                       | Several       |                        | Tungsten carbide beads (Qiagen)                       | Magnetic beads-based  |                 |
| [214] | 2020 | 40  | animal      | fecal samples              | DNA | illumina             | De novo | genomoviruses and microvirus        | Microviridae, Genomoviridae                                                                                                                         | Arizona       | America region         | High Pure Viral Nucleic Acid kit (Roche)              | Filter tube           |                 |
| [215] | 2021 | 2   | environment | seafloor                   | DNA | illumina             | /       | Caudovirales                        | ND,                                                                                                                                                 | Pacific Ocean |                        | PowerSoil DNA Isolation kit (MO BIO)                  | Silica membrane-based |                 |
| [216] | 2016 | 406 | plant       | leaves                     | RNA | Roche_454            | De novo | polverovirus-like, tombusvirus-like | Luteoviridae, Tombusviridae                                                                                                                         | Burkina Faso  | Africa region          | NucleoSpin 96 Virus Core Kit (Macherey-Nagel)         | Silica membrane-based |                 |
| [217] | 2018 | 311 | animal      | serum                      | DNA | illumina             | De novo | torquo teno mini virus              | Anelloviridae,                                                                                                                                      | China         | South-East Asia region | QIAamp viral RNA kit (Qiagen)                         | Silica membrane-based |                 |
| [218] | 2015 | 19  | animal      | fecal samples              | RNA | Roche_454            | /       | astrovirus                          | Astroviridae,                                                                                                                                       | Hungary       | European region        | /                                                     | ND                    |                 |
| [219] | 2018 | 1   | animal      | cloacal and tissue samples | RNA | illumina             | De novo | passerivirus                        | Picornaviridae,                                                                                                                                     | Hungary       | European region        | QIAamp spin-column (Qiagen)                           | Column-based          |                 |
| [220] | 2016 | 1   | environment | sewage waters              | DNA | illumina             | De novo | several                             | Circoviridae, Geminiviridae, Microviridae,                                                                                                          | Florida       | America region         | Phenol-chloroform extraction method                   | Solvent-based         | ultrafiltration |

|       |      |          |             |                                        |     |             |         |                                                                   |                                                          |               |                        |                                            |                                |
|-------|------|----------|-------------|----------------------------------------|-----|-------------|---------|-------------------------------------------------------------------|----------------------------------------------------------|---------------|------------------------|--------------------------------------------|--------------------------------|
| [221] | 2021 | 7447     | animal      | insects                                | RNA | illumina    | /       | Jingchuvirales and Bunyavirales                                   | Peribunyaviridae,                                        | Korea         | South-East Asia region | QIAamp viral RNA mini kit (Qiagen)         | Other/multiple type            |
| [222] | 2019 | 4100     | animal      | insects                                | RNA | illumina    | /       | Uukuniemi virus and phlebovirus                                   | Phenuiviridae, Phenuiviridae                             | Zealand       | European region        | MagNA Pure Large Volume kit (Roche)        | Magnetic glass particles-based |
| [223] | 2017 | 1        | animal      | brain, spinal cord and spleen material | RNA | Ion Torrent | De novo | astrovirus                                                        | Astroviridae,                                            | UK            | European region        | RNeasy kit (Qiagen), TRIzol reagents       | Column-based, Solvent-based    |
| [224] | 2017 | ND       | environment | soil                                   | DNA | illumina    | De novo | phage NCTB                                                        | Myoviridae,                                              | New Caledonia | South-East Asia region | /                                          | ND                             |
| [225] | 2018 | 88       | animal      | serum                                  | RNA | illumina    | De novo | partitivirus, dicistrovirus                                       | Dicistroviridae, Partiviridae                            | Peru          | America region         | Maxwell 16 automated extractor (Promega)   | Solvent-based                  |
| [226] | 2016 | 58       | animal      | fecal samples                          | DNA | illumina    | /       | pecoviruses                                                       | Unclassified,                                            | Peru          | America region         | Maxwell 16 automated extractor (Promega)   | Magnetic beads-based           |
| [227] | 2016 | 5        | animal      | fecal samples                          | DNA | illumina    | De novo | protoparvovirus                                                   | Parvoviridae,                                            | Bhutan        | Western Pacific region | Maxwell 16 automated extractor (Promega)   | Magnetic beads-based           |
| [228] | 2016 | 3        | animal      | heart and lung tissues homogenate      | DNA | illumina    | De novo | PCV3                                                              | Circoviridae,                                            | United States | America region         | MagMAX-96 Viral RNA Isolation Kit (Ambion) | Magnetic beads-based           |
| [229] | 2014 | 120      | animal      | nasopharyngeal aspirates               | DNA | illumina    | /       | cyclovirus                                                        | Circoviridae,                                            | Chile         | America region         | MagMAX Viral RNA Isolation kit             | Magnetic beads-based           |
| [230] | 2014 | 48       | animal      | fecal samples                          | RNA | illumina    | /       | astrovirus                                                        | Astroviridae,                                            | Burkina Faso  | Africa region          | /                                          | ND                             |
| [231] | 2020 | Database | animal      | fecal samples and tissues              | RNA | illumina    | /       | picorna-like virus, noroviruses, toti-like virus, Alongshan virus | Picornaviridae, Caliciviridae, Totiviridae, Flaviviridae | Finland       | European region        | QIAamp viral RNA kit (Qiagen)              | Silica membrane-based          |
| [232] | 2013 | 10       | animal      | blood                                  | DNA | Roche_454   | /       | marseillevirus-like                                               | Marseilleviridae,                                        | France        | European region        | High Pure Viral Nucleic Acid kit (Roche)   | Filter tube                    |
| [233] | 2020 | 5        | animal      | Brain, heart, tic, liver               | RNA | illumina    | /       | Hepacivirus, Pegivirus                                            | Flaviviridae, Flaviviridae                               | Australia     | South-East Asia region | RNeasy Plus Mini Kit (Qiagen)              | Column-based                   |

|       |      |      |             |                               |     |           |         |                                                                                                                                                                    |                                                                                                           |           |                        |                                            |                       |                   |
|-------|------|------|-------------|-------------------------------|-----|-----------|---------|--------------------------------------------------------------------------------------------------------------------------------------------------------------------|-----------------------------------------------------------------------------------------------------------|-----------|------------------------|--------------------------------------------|-----------------------|-------------------|
| [234] | 2021 | 6674 | animal      | insects                       | RNA | illumina  | De novo | flavivirus and orthomyxovirus                                                                                                                                      | Flaviviridae,                                                                                             | Australia | South-East Asia region | QIAamp viral RNA mini kit (Qiagen)         | Other/multiple type   |                   |
| [235] | 2020 | 85   | animal      | fecal samples                 | DNA | illumina  | De novo | several                                                                                                                                                            | Smacoviridae, Unclassified                                                                                | China     | South-East Asia region | QIAamp viral RNA mini kit (Qiagen)         | Other/multiple type   |                   |
| [236] | 2017 | 1    | animal      | nasal swabs and fecal samples | DNA | illumina  | De novo | polyomavirus                                                                                                                                                       | Polyomaviridae,                                                                                           | China     | South-East Asia region | QIAamp viral RNA mini kit (Qiagen)         | Other/multiple type   |                   |
| [237] | 2017 | 625  | animal      | shrimps                       | DNA | illumina  | De novo | SHIV                                                                                                                                                               | Iridoviridae,                                                                                             | China     | South-East Asia region | QIAamp viral DNA kit (Qiagen)              | Column-based          |                   |
| [238] | 2015 | 12   | environment | peat soil water samples       | DNA | Roche_454 | De novo | microviridae                                                                                                                                                       | Microviridae,                                                                                             | France    | European region        | Nucleospin Extract II kit (Macherey–Nagel) | Silica membrane-based | PEG precipitation |
| [239] | 2016 | 12   | environment | peat soil water samples       | DNA | Roche_454 | De novo | crucivirus                                                                                                                                                         | Cruciviridae,                                                                                             | France    | European region        | /                                          | ND                    | PEG precipitation |
| [240] | 2020 | ND   | animal      | mosquito excreta samples      | RNA | illumina  | De novo | Smithfield permutotetra-like virus, Redbank virus, Old Port virus, Perrin Park virus, Warroolaba Creek virus 1, Warroolaba Creek virus 2, Warroolaba Creek virus 3 | Unclassified, Unclassified, Unclassified, Iflaviridae, Dicistroviridae, Dicistroviridae, Dicistroviridae, | Australia | South-East Asia region | QIAamp viral RNA mini kit (Qiagen)         | Other/multiple type   |                   |
| [241] | 2021 | 24   | animal      | insects                       | RNA | illumina  | De novo | rhabdovirus                                                                                                                                                        | Rhabdoviridae,                                                                                            | Mexico    | America region         | QIAamp viral RNA mini kit (Qiagen)         | Other/multiple type   |                   |
| [242] | 2018 | 3    | environment | air                           | DNA | illumina  | /       | Caulimoviridae                                                                                                                                                     | Caulimoviridae,                                                                                           | Spain     | European region        | PowerSoil DNA Isolation kit (MO BIO)       | Silica membrane-based |                   |
| [243] | 2017 | ND   | animal      | thorax and abdomen            | RNA | illumina  | De novo | ADV, ARV, ABV, ANV, AFV                                                                                                                                            | Rhabdoviridae, Bunyaviridae, Flaviviridae, Iflaviviridae, Unclassified,                                   | Several   |                        | TRIzol reagents                            | Solvent-based         |                   |
| [244] | 2013 | 2    | animal      | intestinal content samples    | RNA | Roche_454 | /       | seadornavirus                                                                                                                                                      | Reoviridae,                                                                                               | Hungary   | European region        | TRIzol reagents                            | Solvent-based         |                   |
| [245] | 2014 | 1    | animal      | fecal samples                 | RNA | Roche_454 | /       | dicistrovirus                                                                                                                                                      | Dicistroviridae,                                                                                          | Hungary   | European region        | QIAamp viral RNA mini kit (Qiagen)         | Other/multiple type   |                   |

|       |      |          |             |                            |     |                                              |         |                 |                                                                                                                                                                               |               |                        |                                         |                       |                            |
|-------|------|----------|-------------|----------------------------|-----|----------------------------------------------|---------|-----------------|-------------------------------------------------------------------------------------------------------------------------------------------------------------------------------|---------------|------------------------|-----------------------------------------|-----------------------|----------------------------|
| [246] | 2018 | 39       | animal      | fecal samples              | RNA | illumina                                     | De novo | hepevirus       | Hepeviridae,                                                                                                                                                                  | Hungary       | European region        | QIAamp spin-column (Qiagen)             | Column-based          |                            |
| [247] | 2020 | 98       | animal      | fecal samples              | RNA | illumina                                     | De novo | hepevirus       | Hepeviridae,                                                                                                                                                                  | Hungary       | European region        | MagMAX Viral RNA Isolation kit          | Magnetic beads-based  |                            |
| [248] | 2015 | 24       | animal      | fecal samples              | RNA | illumina                                     | De novo | picornavirus    | Picornaviridae,                                                                                                                                                               | Hungary       | European region        | /                                       | ND                    |                            |
| [249] | 2015 | 1        | animal      | intestinal content samples | RNA | Roche_454                                    | /       | posavirus       | Smacoviridae,                                                                                                                                                                 | Hungary       | European region        | /                                       | ND                    |                            |
| [250] | 2020 | 58       | animal      | mussels                    | DNA | illumina                                     | De novo | densovirus      | Parvoviridae,                                                                                                                                                                 | United States | America region         | QIAamp MinElute Virus Spin Kit (Qiagen) | Column-based          |                            |
| [251] | 2019 | ND       | plant       | plants                     | DNA | sanger                                       | De novo | CRESS-DNA virus | Unclassified,                                                                                                                                                                 | New Zealand   | South-East Asia region | /                                       | ND                    |                            |
| [252] | 2020 | 1        | animal      | cerebral biopsy            | RNA | illumina                                     | De novo | cristoli virus  | peribunyaviridae,                                                                                                                                                             | France        | European region        | QIAasympfony (Qiagen)                   | Other/multiple type   |                            |
| [253] | 2018 | Database | animal      | kidney                     | DNA | illumina                                     | De novo | parvovirus      | Parvoviridae,                                                                                                                                                                 | Australia     | South-East Asia region | RNeasy Mini Kit (Qiagen)                | Silica membrane-based |                            |
| [254] | 2010 | 384      | plant       | plants                     | RNA | Roche_454                                    | /       | several         | Bromoviridae, Caulimoviridae, Chrysoviridae, Closteroviridae, Endornaviridae, Luteoviridae, Narnaviridae, Partitiviridae, Potyviridae, Totiviridae, Tymoviridae, Unclassified | Costa Rica    | America region         | Phenol-chloroform extraction method     | Solvent-based         |                            |
| [255] | 2009 | Database | environment | reclaimed and sea water    | DNA | Analyzes sequences obtained in other studies | /       | circovirus      | Circoviridae,                                                                                                                                                                 | Several       |                        | /                                       | ND                    | tangential flow filtration |
| [256] | 2011 | ND       | animal      | insects                    | DNA | Not available                                | /       | cyclovirus      | Circoviridae,                                                                                                                                                                 | New Zealand   | South-East Asia region | QIAamp MinElute Virus Spin Kit (Qiagen) | Column-based          |                            |
| [257] | 2013 | 6        | animal      | insects                    | DNA | Not available                                | /       | mastrevirus     | Geminiviridae,                                                                                                                                                                | United States | America region         | QIAamp MinElute Virus Spin Kit (Qiagen) | Column-based          |                            |

|       |      |          |             |                                |     |             |         |                               |                           |                 |                        |  |                                                           |                       |                                               |
|-------|------|----------|-------------|--------------------------------|-----|-------------|---------|-------------------------------|---------------------------|-----------------|------------------------|--|-----------------------------------------------------------|-----------------------|-----------------------------------------------|
| [258] | 2015 | 21       | animal      | marine invertebrate species    | DNA | Roche_454   | /       | CRESS-DNA virus               | ND,                       | /               |                        |  | QIAamp MinElute Virus Spin Kit (Qiagen)                   | Column-based          |                                               |
| [259] | 2015 | ND       | animal      | insects                        | DNA | Roche_454   | /       | Begomovirus                   | Geminiviridae,            | Several         |                        |  | QIAamp MinElute Virus Spin Kit (Qiagen)                   | Column-based          |                                               |
| [260] | 2012 | Database | environment | water                          | DNA | Roche_454   | /       | Chlamydiae phage              | Microviridae,             | France          | European region        |  | QIAamp DNA Mini Kit (Qiagen)                              | Silica membrane-based | tangential flow filtration, PEG precipitation |
| [261] | 2014 | 127      | environment | water                          | DNA | illumina    | /       | microviridae and caudovirales | Microviridae, Podoviridae | Canada          | America region         |  | Wizard Prep kit (Promega)                                 | Column-based          | pore filtration                               |
| [262] | 2017 | 2        | environment | freshwater                     | DNA | illumina    | De novo | several                       | Mimiviridae,              | Wisconsin       | America region         |  | FastDNA Kit (MP Biomedicals)                              | Silica membrane-based | pore filtration                               |
| [263] | 2021 | 384      | plant       | fungus                         | DNA | illumina    | De novo | narnavirus                    | Narnaviridae,             | Italy and Spain | European region        |  | Spectrum Plant Total RNA kit instructions (Sigma-Aldrich) | Column-based          |                                               |
| [264] | 2020 | 1        | animal      | C6/36 cells (Aedes albopictus) | RNA | Ion Torrent | De novo | arbovirus                     | Flaviviridae,             | Brazil          | America region         |  | QIAamp viral RNA mini kit (Qiagen)                        | Other/multiple type   |                                               |
| [265] | 2012 | 10       | animal      | plasma                         | DNA | illumina    | /       | HERV                          | Retroviridae,             | China           | South-East Asia region |  | QIAamp DNA blood mini kit (Qiagen)                        | Silica membrane-based |                                               |
| [266] | 2016 | 40       | animal      | fecal samples                  | DNA | illumina    | De novo | Chapparvovirus                | Parvoviridae,             | China           | South-East Asia region |  | MiniBEST Universal Genomic DNA Extraction Kit (TaKaRa)    | Magnetic beads-based  |                                               |
| [267] | 2016 | 40       | animal      | intestinal content samples     | DNA | illumina    | /       | RatBuV                        | Parvoviridae,             | China           | South-East Asia region |  | MiniBEST Universal Genomic DNA Extraction Kit (TaKaRa)    | Column-based          |                                               |
| [268] | 2016 | 20       | animal      | fecal samples                  | DNA | illumina    | De novo | bocavirus                     | Parvoviridae,             | China           | South-East Asia region |  | MiniBEST Universal Genomic DNA Extraction Kit (TaKaRa)    | Column-based          |                                               |

|       |      |       |        |                                                     |             |             |         |                                    |                                                                                                                                                                                                                              |               |                        |                                                               |                                      |
|-------|------|-------|--------|-----------------------------------------------------|-------------|-------------|---------|------------------------------------|------------------------------------------------------------------------------------------------------------------------------------------------------------------------------------------------------------------------------|---------------|------------------------|---------------------------------------------------------------|--------------------------------------|
| [269] | 2021 | 120   | plant  | fruits                                              | RNA         | illumina    | De novo | tepovirus                          | Betaflexiviridae,                                                                                                                                                                                                            | Florida       | America region         | /                                                             | ND                                   |
| [270] | 2018 | 12290 | animal | insects                                             | DNA and RNA | illumina    | De novo | several                            | Luteoviridae,<br>Tombusviridae,<br>Tymoviridae,<br>Virgaviridae,<br>Astroviridae,<br>Mesoniviridae,<br>Nodaviridae,<br>Unclassified,<br>Hytrosaviridae,<br>Anelloviridae,<br>Bidnaviridae,<br>Circoviridae,<br>Parvoviridae, | California    | America region         | MagMAX Express-96<br>Deep Well<br>Magnetic Particle Processor | Magnetic beads-based                 |
| [271] | 2017 | 4     | animal | serum                                               | DNA         | illumina    | /       | parvovirus                         | Parvoviridae,                                                                                                                                                                                                                | United States | America region         | MagMAX Viral RNA Isolation kit                                | Magnetic beads-based                 |
| [272] | 2017 | ND    | animal | insects                                             | RNA         | illumina    | De novo | Tetravirus, reoviruses, orbivirus, | Alphatetraviridae,<br>Reoviridae, Reoviridae,                                                                                                                                                                                | Texas         | America region         | MagMAX Viral RNA Isolation kit                                | Magnetic beads-based                 |
| [273] | 2019 | 6368  | animal | insects                                             | RNA         | illumina    | De novo | YBV1, YPLV3, YSLV1                 | Bunyaviridae,<br>Picornaviridae,<br>Unclassified,                                                                                                                                                                            | Oklahoma      | America region         | QIAamp 96 Virus QIAcube HT kit (Qiagen)                       | Silica membrane-based                |
| [274] | 2016 | 155   | animal | fecal samples                                       | RNA         | illumina    | De novo | Posavirus                          | Picornaviridae,                                                                                                                                                                                                              | Japan         | South-East Asia region | TRIzol reagents                                               | Solvent-based                        |
| [275] | 2021 | 140   | animal | cell culture                                        | RNA         | illumina    | /       | Hedwig virus                       | Peribunyaviridae,                                                                                                                                                                                                            | Germany       | European region        | QIAamp viral RNA mini kit (Qiagen)                            | Other/multiple type                  |
| [276] | 2015 | 72    | animal | lung, liver, spleen, kidney and intestinal contents | RNA         | Ion Torrent | /       | cyclovirus                         | Circoviridae,                                                                                                                                                                                                                | Zambia        | Africa region          | High Pure Viral Nucleic Acid kit (Roche)                      | Filter tube                          |
| [277] | 2013 | 9     | plant  | plants                                              | RNA         | Roche_454   | /       | panicovirus                        | Tombusviridae,                                                                                                                                                                                                               | Oklahoma      | America region         | /                                                             | ND                                   |
| [278] | 2016 | 1     | animal | brain sample                                        | RNA         | illumina    | /       | astrovirus                         | Astroviridae,                                                                                                                                                                                                                | Germany       | European region        | TRIzol reagents, RNeasy Mini Kit (Qiagen)                     | Solvent-based, Silica membrane-based |
| [279] | 2016 | ND    | animal | insects                                             | RNA         | Ion Torrent | De novo | SRBV, GABV                         | Aliusviridae,<br>Peribunyaviridae                                                                                                                                                                                            | Belgium       | European region        | RNeasy Lipid Tissue Mini kit (Qiagen)                         | Column-based                         |



|       |      |        |             |                         |             |           |         |                                                  |                                                                                                       |                                                          |                                       |                                                                            |                                     |                     |
|-------|------|--------|-------------|-------------------------|-------------|-----------|---------|--------------------------------------------------|-------------------------------------------------------------------------------------------------------|----------------------------------------------------------|---------------------------------------|----------------------------------------------------------------------------|-------------------------------------|---------------------|
| [280] | 2018 | 28     | environment | soil                    | DNA and RNA | illumina  | /       | mimiviridae                                      | Mimiviridae,                                                                                          | Massachusetts                                            | America region                        | PowerSoil DNA Isolation kit (MO BIO), PowerSoil RNA Isolation kit (MO BIO) | Silica membrane-based, Column-based | syringe filtratione |
| [281] | 2014 | 39     | animal      | swab samples            | RNA         | Roche_454 | De novo | parvovirus, polyomavirus                         | Parvoviridae, Polyomaviridae                                                                          | Arctic                                                   |                                       | /                                                                          | ND                                  |                     |
| [282] | 2017 | 261521 | animal      | insects                 | RNA         | illumina  | De novo | rhabdovirus                                      | Rhabdoviridae,                                                                                        | Germany                                                  | European region                       | MagMAX Viral RNA Isolation kit                                             | Magnetic beads-based                |                     |
| [283] | 2011 | 12     | animal      | fecal samples           | RNA         | Roche_454 | /       | astroviruses and bocaviruses                     | Astroviridae, Parvoviridae                                                                            | North Carolina                                           | America region                        | QIAamp viral RNA kit (Qiagen)                                              | Silica membrane-based               |                     |
| [284] | 2017 | 1      | animal      | fecal samples           | RNA         | illumina  | De novo | Enterovirus                                      | Picornaviridae,                                                                                       | California                                               | America region                        | SV Total Viral RNA mini kit (Qiagen)                                       | Column-based                        |                     |
| [285] | 2019 | 95     | animal      | insects                 | RNA         | illumina  | De novo | several                                          | Luteoviridae, Phenuiviridae, Totiviridae, Unclassified, Orthomyxoviridae, Rhabdoviridae, Tymoviridae, | Guadeloupe                                               | America region                        | QIAamp viral RNA mini kit (Qiagen)                                         | Other/multiple type                 |                     |
| [286] | 2019 | ND     | animal      | fecal samples           | DNA         | illumina  | De novo | circo-like virus                                 | Circoviridae,                                                                                         | Croatia                                                  | European region                       | iPrep virus kit (Invitrogen)                                               | Other/multiple type                 |                     |
| [287] | 2020 | 15     | animal      | guano, feces and saliva | DNA         | illumina  | De novo | Adeno-associated virus, densovirus and iflavirus | Adenoviridae, Iflaviridae, Parvoviridae,                                                              | Croatia                                                  | European region                       | iPrep virus kit (Invitrogen)                                               | Other/multiple type                 |                     |
| [288] | 2021 | 2142   | animal      | fecal samples           | RNA         | illumina  | De novo | Rotavirus                                        | Reoviridae,                                                                                           | Ghana, Gabon, Bulgaria, Romania, Germany, and Costa Rica | Multiple (Africa, Europe and America) | QIAamp viral RNA mini kit (Qiagen)                                         | Other/multiple type                 |                     |
| [289] | 2017 | 69     | animal      | tissue pools            | DNA         | illumina  | De novo | Parvovirus, polyomavirus, adenovirus             | Parvoviridae, Polyomaviridae, Adenoviridae,                                                           | California                                               | America region                        | QIAamp viral RNA mini kit (Qiagen)                                         | Other/multiple type                 |                     |
| [290] | 2014 | 13     | animal      | fecal samples           | DNA         | Roche_454 | /       | circular DNA viruses                             | Circoviridae,                                                                                         | Netherlands                                              | European region                       | /                                                                          | ND                                  |                     |

|       |      |     |             |                      |             |           |         |                                                           |                                                                |                |                        |                                                |                                |                            |
|-------|------|-----|-------------|----------------------|-------------|-----------|---------|-----------------------------------------------------------|----------------------------------------------------------------|----------------|------------------------|------------------------------------------------|--------------------------------|----------------------------|
| [291] | 2013 | 39  | animal      | fecal samples        | DNA and RNA | sanger    | /       | Picornavirus, papillomavirus, anellovirus                 | Picornaviridae, Papillomaviridae, Anelloviridae,               | Netherlands    | European region        | /                                              | ND                             |                            |
| [292] | 2013 | 58  | animal      | Serum and CSF        | DNA         | Roche_454 | De novo | cyclovirus                                                | Circoviridae,                                                  | Malawi         | Africa region          | MagNA Pure LC - Total Nucleic Acid Kit (Roche) | Magnetic glass particles-based |                            |
| [293] | 2021 | 107 | animal      | nasopharyngeal swabs | RNA         | illumina  | /       | orthopneumovirus                                          | Pneumoviridae,                                                 | China          | South-East Asia region | /                                              | ND                             |                            |
| [294] | 2018 | 36  | animal      | ticks, bovine serum  | RNA         | illumina  | De novo | tymovirus                                                 | Tymoviridae,                                                   | Brazil         | America region         | QIAamp viral RNA mini kit (Qiagen)             | Other/multiple type            |                            |
| [295] | 2021 | 10  | environment | water                | DNA         | illumina  | De novo | several                                                   | Siphoviridae, Myoviridae, Phycodnaviridae,                     | Atlantic Ocean |                        | Phenol-chloroform extraction method            | Solvent-based                  | FeCl3 precipitation        |
| [296] | 2017 | 12  | plant       | leaves               | DNA         | illumina  | De novo | capulavirus                                               | Geminiviridae,                                                 | Finland        | European region        | TRIzol reagents                                | Solvent-based                  |                            |
| [297] | 2019 | 254 | plant       | leaves               | RNA         | illumina  | De novo | Caulimovirus, Betapartitivirus, Enamovirus, Closterovirus | Caulimoviridae, Partitiviridae, Solemoviridae, Closteroviridae | Finland        | European region        | E.Z.N.A. Plant Kit (Omega Biotek)              | Magnetic beads-based           |                            |
| [298] | 2019 | 12  | animal      | fecal samples        | DNA         | illumina  | De novo | CRESS-DNA virus                                           | ND,                                                            | Japan          | South-East Asia region | AMPure beads (PacBio)                          | Magnetic beads-based           |                            |
| [299] | 2011 | 13  | animal      | lung samples         | DNA         | sanger    | /       | anellovirus                                               | Anelloviridae,                                                 | California     | America region         | QIAamp MinElute Virus Spin Kit (Qiagen)        | Column-based                   |                            |
| [300] | 2017 | 20  | animal      | brain tumor samples  | DNA         | illumina  | De novo | betatorquevirus                                           | Anelloviridae,                                                 | /              |                        | QIAamp viral RNA mini kit (Qiagen)             | Other/multiple type            |                            |
| [301] | 2009 | 62  | animal      | external swabs       | DNA         | sanger    | /       | tornovirus 1 (STTV1)                                      | Circoviridae,                                                  | Florida        | America region         | QIAamp MinElute Virus Spin Kit (Qiagen)        | Column-based                   |                            |
| [302] | 2012 | ND  | environment | sewage waters        | DNA and RNA | Roche_454 | /       | kobuvirus, salivirus, sapovirus, astrovirus               | Picornaviridae, Picornaviridae, Caliciviridae, Astroviridae    | Several        |                        | QIAamp spin columns (Qiagen)                   | Column-based                   | tangential flow filtration |
| [303] | 2014 | 55  | animal      | fecal samples        | RNA         | illumina  | De novo | Sakobuvirus, feline bocavirus 2                           | Picornaviridae, Parvoviridae                                   | Portugal       | European region        | QIAamp viral RNA mini kit (Qiagen)             | Other/multiple type            |                            |

|       |      |     |             |                           |             |             |         |                                               |                                           |               |                        |                                         |                       |                            |
|-------|------|-----|-------------|---------------------------|-------------|-------------|---------|-----------------------------------------------|-------------------------------------------|---------------|------------------------|-----------------------------------------|-----------------------|----------------------------|
| [304] | 2015 | 50  | animal      | sea otters                | DNA         | illumina    | /       | papillomavirus                                | Papillomaviridae,                         | California    | America region         | /                                       | ND                    |                            |
| [305] | 2013 | 12  | animal      | Hepatopancreas tissue     | DNA         | sanger      | /       | nodavirus                                     | Nodaviridae,                              | Florida       | America region         | DNeasy Blood & Tissue Kit (Qiagen)      | Column-based          |                            |
| [306] | 2011 | 480 | animal      | insects                   | DNA         | Roche_454   | De novo | densovirus                                    | Parvoviridae,                             | California    | America region         | Formamide Procedure                     | Solvent-based         |                            |
| [307] | 2013 | ND  | animal      | fecal samples and tissues | RNA         | Roche_454   | /       | astrovirus                                    | Astroviridae,                             | Japan         | South-East Asia region | QIAamp MinElute Virus Spin Kit (Qiagen) | Column-based          |                            |
| [308] | 2011 | 2   | plant       | insects                   | DNA         | sanger      | /       | Begomovirus                                   | Geminiviridae,                            | Florida       | America region         | QIAamp MinElute Virus Spin Kit (Qiagen) | Column-based          |                            |
| [309] | 2019 | 70  | animal      | blood                     | RNA         | illumina    | De novo | Zaire Ebola virus (EBOV)                      | Filoviridae,                              | Several       |                        | QIAamp viral RNA kit (Qiagen)           | Silica membrane-based |                            |
| [310] | 2020 | 573 | animal      | insects                   | RNA         | illumina    | De novo | Chuviridae, Phenuiviridae                     | Chuviridae, Phenuiviridae                 | China         | South-East Asia region | QIAamp viral RNA mini kit (Qiagen)      | Other/multiple type   |                            |
| [311] | 2020 | 251 | animal      | fecal samples             | DNA         | illumina    | De novo | Adenovirus C                                  | Adenoviridae,                             | Brazil        | America region         | ZR Viral DNA/RNA Kit (Zymo Research)    | Other/multiple type   |                            |
| [312] | 2012 | 1   | environment | plants                    | DNA         | Roche_454   | /       | Bordetella phages bpp1                        | Podoviridae,                              | Singapore     | Western Pacific region | Formamide Procedure                     | Solvent-based         | tangential flow filtration |
| [313] | 2019 | ND  | animal      | insects                   | RNA         | Ion Torrent | /       | orbivirus                                     | Reoviridae,                               | United States | America region         | TRIzol reagents                         | Solvent-based         |                            |
| [314] | 2016 | 315 | animal      | insects                   | RNA         | illumina    | /       | Thogotovirus, Rhabdovirus                     | Rhabdoviridae,                            | Senegal       | Africa region          | TRIzol reagents                         | Solvent-based         |                            |
| [315] | 2021 | 27  | animal      | insects                   | RNA         | illumina    | De novo | zika virus                                    | Flaviviridae,                             | Barbados      | America region         | QIAamp UCP Micro Kit (Qiagen)           | Column-based          |                            |
| [316] | 2016 | 1   | animal      | fecal samples             | RNA         | illumina    | De novo | Rotavirus astrovirus enterovirus              | Astroviridae, Reoviridae, Picornaviridae, | Belgium       | European region        | QIAamp viral RNA mini kit (Qiagen)      | Other/multiple type   |                            |
| [317] | 2020 | 91  | animal      | nasal-throat swabs        | DNA and RNA | illumina    | De novo | Cyclovirus, gemycircularvirus, and statovirus | Circoviridae,                             | California    | America region         | QIAamp 96 Virus                         | Silica membrane-based |                            |

|       |      |      |             |                                                                                                                                                           |     |           |         |                                         |                                                                     |                     |                        |                                     |                                       |                     |  |
|-------|------|------|-------------|-----------------------------------------------------------------------------------------------------------------------------------------------------------|-----|-----------|---------|-----------------------------------------|---------------------------------------------------------------------|---------------------|------------------------|-------------------------------------|---------------------------------------|---------------------|--|
|       |      |      |             |                                                                                                                                                           |     |           |         |                                         |                                                                     |                     |                        |                                     | QIAcube HT Kit (Qiagen)               |                     |  |
| [318] | 2020 | 70   | animal      | swabs and tissue specimens                                                                                                                                | DNA | illumina  | De novo | Papillomavirus                          | Papillomaviridae,                                                   | /                   |                        |                                     | RNeasy Lipid Tissue Mini kit (Qiagen) | Column-based        |  |
| [319] | 2019 | 50   | animal      | cloacal, oral, and blood samples                                                                                                                          | DNA | illumina  | De novo | Gyrovirus                               | Anelloviridae,                                                      | French Guiana       | America region         | MagMAX Viral RNA Isolation kit      | Magnetic beads-based                  |                     |  |
| [320] | 2020 | 406  | animal      | fecal samples                                                                                                                                             | RNA | illumina  | De novo | Picornaviridae, Reoviridae Hepeviridae. | Picornaviridae, Hepeviridae, Reoviridae,                            | French Guiana       | America region         | MagMAX Viral RNA Isolation kit      | Magnetic beads-based                  |                     |  |
| [321] | 2012 | 156  | animal      | Rectal swabs                                                                                                                                              | DNA | Roche_454 | De novo | Papillomavirus                          | Papillomaviridae,                                                   | Hong Kong           | South-East Asia region | QIAamp viral RNA mini kit (Qiagen)  | Other/multiple type                   |                     |  |
| [322] | 2017 | 23   | animal      | fecal samples                                                                                                                                             | RNA | illumina  | De novo | Enterovirus                             | Picornaviridae,                                                     | Japan               | South-East Asia region | TRIzol reagents                     | Solvent-based                         |                     |  |
| [323] | 2018 | 222  | animal      | fecal samples                                                                                                                                             | RNA | illumina  | De novo | bovine enterovirus                      | Picornaviridae,                                                     | Japan               | South-East Asia region | TRIzol reagents                     | Solvent-based                         |                     |  |
| [324] | 2021 | 1000 | animal      | fecal samples                                                                                                                                             | RNA | illumina  | De novo | Picobirnavirus                          | Picobirnaviridae,                                                   | China               | South-East Asia region | QIAamp viral RNA mini kit (Qiagen)  | Other/multiple type                   |                     |  |
| [325] | 2018 | 4    | environment | water                                                                                                                                                     | RNA | illumina  | De novo | Several                                 | Megabirnaviridae, Hypoviridae                                       | North Pacific Ocean |                        | Phenol-chloroform extraction method | Solvent-based                         | FeCl3 precipitation |  |
| [326] | 2009 | 59   | animal      | crop, poison sac, midgut, hindgut, Malpighian tubules, fat body (queens only), ovaries (queens only), and the remaining tissues of the abdominal carcass. | RNA | sanger    | /       | Solenopsis invicta virus 3              | Solinviviridae,                                                     | /                   |                        | TRIzol reagents                     | Solvent-based                         |                     |  |
| [327] | 2019 | 3189 | animal      | insects                                                                                                                                                   | RNA | illumina  | De novo | several                                 | Dicistroviridae, Dicistroviridae, Dicistroviridae, Polycipiviridae, | Argentina           | America region         | TRIzol reagents                     | Solvent-based                         |                     |  |

|       |      |      |             |                                                                       |                |                  |         |                                 |                                                          |              |                           |                                                 |                              |
|-------|------|------|-------------|-----------------------------------------------------------------------|----------------|------------------|---------|---------------------------------|----------------------------------------------------------|--------------|---------------------------|-------------------------------------------------|------------------------------|
|       |      |      |             |                                                                       |                |                  |         |                                 | Iflaviridae, Totiviridae,<br>Unclassified, Unclassified, |              |                           |                                                 |                              |
| [328] | 2012 | 609  | animal      | insects                                                               | RNA            | Roche_454        | De novo | Polydnavirus                    | Polyomaviridae,                                          | Florida      | America<br>region         | TRIZol<br>reagents                              | Solvent-<br>based            |
| [329] | 2018 | 2730 | animal      | insects                                                               | RNA            | illumina         | De novo | SINV-5                          | Unclassified,                                            | Argentina    | America<br>region         | TRIZol<br>reagents                              | Solvent-<br>based            |
| [330] | 2017 | 151  | animal      | intestinal<br>content<br>samples                                      | DNA            | Roche_454        | De novo | Adenovirus                      | Adenoviridae,                                            | North Sea    | America<br>region         | Nucleospin<br>RNA XS Kit<br>(Machery-<br>Nagel) | Silica<br>membrane-<br>based |
| [331] | 2020 | 978  | animal      | serum                                                                 | RNA            | illumina         | De novo | Flavivirus                      | Flaviviridae,                                            | Pennsylvania | America<br>region         | QIAamp<br>viral RNA<br>mini kit<br>(Qiagen)     | Other/multip<br>le type      |
| [332] | 2021 | 767  | animal      | insects                                                               | RNA            | illumina         | /       | coltiviruses,<br>reoviruses     | Reoviridae, Reoviridae                                   | Belgium      | European<br>region        | QIAamp<br>viral RNA<br>mini kit<br>(Qiagen)     | Other/multip<br>le type      |
| [333] | 2020 | ND   | animal      | fecal samples                                                         | DNA and<br>RNA | Ion Torrent      | /       | Aviadenovirus,<br>gyrovirus     | Adenoviridae,<br>Anelloviridae                           | Australia    | South-East<br>Asia region | QIAamp<br>viral RNA<br>mini kit<br>(Qiagen)     | Other/multip<br>le type      |
| [334] | 2020 | ND   | animal      | fecal samples                                                         | DNA and<br>RNA | Ion Torrent      | /       | Parvoviruses,<br>Picornaviruses | Picornaviridae,<br>Parvoviridae                          | Australia    | South-East<br>Asia region | QIAamp<br>viral RNA<br>mini kit<br>(Qiagen)     | Other/multip<br>le type      |
| [335] | 2008 | 5    | animal      | insect pools,<br>skunk brain,<br>human feces<br>and sewer<br>effluent | RNA            | Not<br>available | /       | Orthoreovirus,<br>orbivirus     | Reoviridae,                                              | Montana      | America<br>region         | QIamp Viral<br>RNA<br>isolation<br>kit (Qiagen) | Column-<br>based             |
| [336] | 2018 | 5    | environment | water                                                                 | DNA            | illumina         | De novo | Holosalivirus                   | Siphoviridae,                                            | Spain        | European<br>region        | /                                               | ND                           |
| [337] | 2021 | 253  | animal      | fecal samples                                                         | RNA            | illumina         | /       | SqMV                            | Secoviridae,                                             | Brazil       | America<br>region         | /                                               | ND                           |
| [338] | 2016 | 14   | environment | cyanobacterial<br>mat samples                                         | DNA            | illumina         | De novo | PhV1                            | Herpesviridae,                                           | Lake Huron   | America<br>region         | /                                               | ND                           |
| [339] | 2016 | 22   | animal      | blood and<br>fecal samples                                            | DNA            | sanger           | De novo | FelineAV621                     | Anelloviridae,                                           | China        | South-East<br>Asia region | /                                               | ND                           |

|       |      |      |             |                                                                                                |             |          |         |                                                                                                                                                                                                                                                                                                                                                                                                                                     |                                                                                                                                                                                                                   |               |                        |                                                         |                                |                            |
|-------|------|------|-------------|------------------------------------------------------------------------------------------------|-------------|----------|---------|-------------------------------------------------------------------------------------------------------------------------------------------------------------------------------------------------------------------------------------------------------------------------------------------------------------------------------------------------------------------------------------------------------------------------------------|-------------------------------------------------------------------------------------------------------------------------------------------------------------------------------------------------------------------|---------------|------------------------|---------------------------------------------------------|--------------------------------|----------------------------|
| [340] | 2017 | 46   | animal      | fecal samples, blood, nasopharyngeal secretion, heart, liver, spleen, lung, and kidney tissues | DNA and RNA | illumina | De novo | several                                                                                                                                                                                                                                                                                                                                                                                                                             | Papillomaviridae, Picornaviridae, Unclassified, Anelloviridae, Genomoviridae,                                                                                                                                     | China         | South-East Asia region | QIAamp viral RNA mini kit (Qiagen)                      | Other/multiple type            |                            |
| [341] | 2021 | ND   | environment | water                                                                                          | DNA         | illumina | De novo | vB_OliS_GJ44                                                                                                                                                                                                                                                                                                                                                                                                                        | Siphoviridae,                                                                                                                                                                                                     | Yellow Sea    | South-East Asia region | /                                                       | ND                             | tangential flow filtration |
| [342] | 2014 | 22   | animal      | meats                                                                                          | DNA         | illumina | De novo | BPYV2-SF, GyV7-SF                                                                                                                                                                                                                                                                                                                                                                                                                   | Polyomaviridae,                                                                                                                                                                                                   | United States | America region         | MagMAX Viral RNA Isolation kit                          | Magnetic beads-based           |                            |
| [343] | 2014 | 25   | animal      | fecal samples                                                                                  | DNA and RNA | illumina | De novo | astroviruses, bocaviruses, cyclovirus                                                                                                                                                                                                                                                                                                                                                                                               | Astroviridae, Circoviridae, Parvoviridae,                                                                                                                                                                         | California    | America region         | MagMAX Viral RNA Isolation kit                          | Magnetic beads-based           |                            |
| [344] | 2017 | 18   | plant       | maize samples                                                                                  | RNA         | illumina | De novo | BSRV)-like dicistrovirus                                                                                                                                                                                                                                                                                                                                                                                                            | Dicistroviridae,                                                                                                                                                                                                  | Kenya         | Africa region          | MagNA Pure LC - DNA Kit (Roche)                         | Magnetic glass particles-based |                            |
| [345] | 2018 | 520  | animal      | serum                                                                                          | DNA         | illumina | De novo | Parvovirus anellovirus                                                                                                                                                                                                                                                                                                                                                                                                              | Parvoviridae, Anelloviridae                                                                                                                                                                                       | Brazil        | America region         | TRIzol reagents, phenol-chloroform extraction method    | Solvent-based, Solvent-based   |                            |
| [346] | 2016 | 1600 | animal      | insects                                                                                        | RNA         | illumina | De novo | Iflaviruses, Rhabdoviruses, Nodaviruses, Reoviruses, Negeviruses, Sobemoviruses, Pleroviruses, Flaviviridae, Tombusviridae Jogalong virus, Parry's Creek negev-like virus 1, Broome virga-like virus 1, Fitzroy Crossing iflaviridae, Broome luteo-like virus 1, Broome phasivirus 1, Parry's Creek phasivirus 1, Fitzroy Crossing tenui-like virus 1, Fitzroy Crossing qinvirus 1, Broome reo-like virus 1, Fitzroy Crossing toti- | Iflaviridae, Rhabdoviridae, Nodaviridae, Reoviridae, Unclassified, Solemoviridae, Solemoviridae, Flaviviridae, Tombusviridae,                                                                                     | UK            | European region        | TRIzol reagents                                         | Solvent-based                  |                            |
| [347] | 2020 | 300  | animal      | insects                                                                                        | DNA and RNA | illumina | /       |                                                                                                                                                                                                                                                                                                                                                                                                                                     | Flaviviridae, Unclassified, Unclassified, Iflaviridae, Unclassified, Phenuiviridae, Phenuiviridae, Phenuiviridae, Unclassified, Reoviridae, Unclassified, Unclassified, Chrysovriidae, Unclassified, Parvoviridae | Australia     | South-East Asia region | MagMAX Express-96 Deep Well Magnetic Particle Processor | Magnetic beads-based           |                            |

|       |      |      |             |                                     |             |           |         |                                                                             |                                                                                                                                                                 |             |                        |                                              |                       |  |                                                 |
|-------|------|------|-------------|-------------------------------------|-------------|-----------|---------|-----------------------------------------------------------------------------|-----------------------------------------------------------------------------------------------------------------------------------------------------------------|-------------|------------------------|----------------------------------------------|-----------------------|--|-------------------------------------------------|
|       |      |      |             |                                     |             |           |         |                                                                             | like virus 1, Fitzroy Crossing toti-like virus 2, Parry’s Creek toti-like virus 1, Broome chryso-like virus 1, Broome partiti-like virus 1, Broome densovirus 1 |             |                        |                                              |                       |  | ultracentrifugation, tangential flow filtration |
| [348] | 2020 | 13   | environment | water                               | DNA         | Roche_454 | De novo | Several                                                                     | Podoviridae, Siphoviridae, Myoviridae,                                                                                                                          | China       | South-East Asia region | DNeasy Blood & Tissue Kit (Qiagen)           | Column-based          |  |                                                 |
| [349] | 2016 | 16   | animal      | brain sample                        | RNA         | illumina  | De novo | BoRV-CH15.                                                                  | Retroviridae,                                                                                                                                                   | Switzerland | European region        | TRIzol reagents                              | Solvent-based         |  |                                                 |
| [350] | 2020 | 24   | animal      | bone marrow                         | DNA         | illumina  | De novo | Anellovirus                                                                 | Anelloviridae,                                                                                                                                                  | China       | South-East Asia region | QIAamp MinElute Virus Spin Kit (Qiagen)      | Column-based          |  |                                                 |
| [351] | 2015 | 20   | animal      | gut                                 | RNA         | illumina  | De novo | astrovirus                                                                  | Astroviridae,                                                                                                                                                   | China       | South-East Asia region | QIAamp viral RNA mini kit (Qiagen)           | Other/multiple type   |  |                                                 |
| [352] | 2020 | 10   | animal      | liver, heart, intestine and stomach | DNA         | illumina  | /       | parvovirus                                                                  | Parvoviridae,                                                                                                                                                   | China       | South-East Asia region | QIAamp Viral RNA Mini Elute Kit (Qiagen)     | Column-based          |  |                                                 |
| [353] | 2020 | 215  | animal      | fecal samples                       | RNA         | illumina  | De novo | astrovirus                                                                  | Astroviridae,                                                                                                                                                   | China       | South-East Asia region | QIAamp viral RNA mini kit (Qiagen)           | Other/multiple type   |  |                                                 |
| [354] | 2016 | 69   | animal      | fecal samples                       | RNA         | illumina  | /       | Enterovirus                                                                 | Picornaviridae,                                                                                                                                                 | China       | South-East Asia region | QIAamp viral RNA/DNA Extraction Kit (TaKaRa) | Column-based          |  |                                                 |
| [355] | 2018 | 2222 | animal      | insects                             | RNA         | illumina  | De novo | several                                                                     | Unclassified, Phenuiviridae, Rhabdoviridae, Unclassified, Picornaviridae, Rhabdoviridae, Unclassified, Unclassified                                             | China       | South-East Asia region | QIAamp viral RNA kit (Qiagen)                | Silica membrane-based |  |                                                 |
| [356] | 2015 | 5    | environment | ballast water                       | DNA         | illumina  | De novo | Cyprinid herpesvirus 3                                                      | Alloherpesviridae,                                                                                                                                              | Minnesota   | America region         | QIAamp MinElute Virus Spin Kit (Qiagen)      | Column-based          |  |                                                 |
| [357] | 2021 | 14   | animal      | fecal samples                       | DNA and RNA | illumina  | De novo | astrovirus, chaphamaparvovirus , nodavirus, densoviruses, CRESS-DNA viruses | Astroviridae, Parvoviridae, Nodaviridae, Parvoviridae, ND,                                                                                                      | California  | America region         | QIAamp virus minikit (Qiagen)                | Column-based          |  |                                                 |

|       |      |    |        |                                                                                    |             |             |         |                          |                              |          |                        |                                         |                       |
|-------|------|----|--------|------------------------------------------------------------------------------------|-------------|-------------|---------|--------------------------|------------------------------|----------|------------------------|-----------------------------------------|-----------------------|
| [358] | 2021 | 12 | animal | fecal samples                                                                      | RNA         | illumina    | De novo | astrovirus               | Astroviridae,                | Canada   | America region         | MagMAX Viral RNA Isolation kit          | Magnetic beads-based  |
| [359] | 2020 | 43 | animal | fecal samples                                                                      | DNA         | illumina    | De novo | bocavirus                | Parvoviridae,                | Canada   | America region         | QIAamp MinElute Virus Spin Kit (Qiagen) | Column-based          |
| [360] | 2020 | ND | animal | liver, spleen and brain                                                            | RNA         | Ion Torrent | /       | picornavirus             | Picornaviridae,              | China    | South-East Asia region | /                                       | ND                    |
| [361] | 2018 | 40 | animal | fecal samples                                                                      | RNA         | illumina    | /       | Picornavirus, parvovirus | Picornaviridae, Parvoviridae | China    | South-East Asia region | /                                       | ND                    |
| [362] | 2019 | 93 | animal | fecal samples                                                                      | DNA and RNA | illumina    | De novo | Cardiovirus              | Picornaviridae,              | China    | South-East Asia region | QIAamp viral RNA mini kit (Qiagen)      | Other/multiple type   |
| [363] | 2017 | 1  | animal | fecal samples                                                                      | RNA         | Ion Torrent | /       | Parainfluenza virus      | Paramyxoviridae,             | China    | South-East Asia region | QIAamp viral RNA mini kit (Qiagen)      | Other/multiple type   |
| [364] | 2016 | 48 | animal | infected gingival epithelium samples<br>periodontal pockets                        | DNA         | illumina    | De novo | TTMV-222                 | Anelloviridae,               | China    | South-East Asia region | QIAamp viral RNA kit (Qiagen)           | Silica membrane-based |
| [365] | 2017 | 48 | animal | gingival epithelium and connective tissue facing the sulcus<br>periodontal pockets | DNA         | illumina    | De novo | TTMV-204                 | Anelloviridae,               | China    | South-East Asia region | /                                       | ND                    |
| [366] | 2019 | 48 | animal | gingival epithelium and connective tissue facing the sulcus                        | DNA         | illumina    | De novo | Siphoviridae_29632       | Siphoviridae,                | China    | South-East Asia region | QIAamp viral RNA kit (Qiagen)           | Silica membrane-based |
| [367] | 2016 | 87 | animal | fecal samples                                                                      | RNA         | illumina    | De novo | Rotaviruses              | Sedoreoviridae,              | Cameroon | Africa region          | QIAamp viral RNA mini kit (Qiagen)      | Other/multiple type   |
| [368] | 2018 | 87 | animal | fecal samples                                                                      | DNA and RNA | illumina    | De novo | Picorna virus            | Picornaviridae,              | Cameroon | Africa region          | /                                       | ND                    |



|       |      |          |               |                          |     |                                              |         |                                      |                 |               |                              |                                         |                      |                 |
|-------|------|----------|---------------|--------------------------|-----|----------------------------------------------|---------|--------------------------------------|-----------------|---------------|------------------------------|-----------------------------------------|----------------------|-----------------|
| [369] | 2017 | 87       | animal        | fecal samples            | RNA | illumina                                     | De novo | sapovirus                            | Caliciviridae,  | Cameroon      | Africa region                | QIAamp viral RNA mini kit (Qiagen)      | Other/multiple type  |                 |
| [370] | 2017 | 87       | animal        | fecal samples            | RNA | illumina                                     | De novo | Sapovirus                            | Caliciviridae,  | Cameroon      | Africa region                | /                                       | ND                   |                 |
| [371] | 2015 | 1        | animal        | gut                      | DNA | Analyzes sequences obtained in other studies | /       | bacteriophage                        | Mimiviridae,    | Wyoming       | America region               | /                                       | ND                   |                 |
| [372] | 2021 | 300      | animal        | insects                  | DNA | illumina                                     | De novo | Hepe-like virus                      | Hepeviridae,    | China         | South-East Asia region       | QIAamp viral RNA mini kit (Qiagen)      | Other/multiple type  |                 |
| [373] | 2021 | 200      | animal        | nasopharyngeal swabs     | RNA | illumina                                     | De novo | Coltivirus                           | Reoviridae,     | Saudi Arabia  | Eastern Mediterranean region | /                                       | ND                   |                 |
| [374] | 2020 | Database | environment   | water                    | DNA | Analyzes sequences obtained in other studies | /       | SAR11 phage                          | Myoviridae,     | /             |                              | /                                       | ND                   |                 |
| [375] | 2016 | 1        | environment   | water                    | DNA | illumina                                     | De novo | DSS3Φ8                               | Siphoviridae,   | Meryland      | America region               | Phenol-chloroform extraction method     | Solvent-based        | pore filtration |
| [376] | 2015 | 9        | animal        | fecal samples            | RNA | sanger                                       | /       | Sicinivirus                          | Picornaviridae, | China         | South-East Asia region       | QIAamp MinElute Virus Spin Kit (Qiagen) | Column-based         |                 |
| [377] | 2018 | 30       | animal        | fecal samples            | DNA | illumina                                     | De novo | TM7x                                 | ND,             | United States | America region               | Chemagic MSM I (Perkin Elmer)           | Magnetic beads-based |                 |
| [378] | 2011 | 42       | animal        | enteric samples          | DNA | sanger                                       | De novo | Microviridae (batteriofago)          | Microviridae,   | California    | America region               | /                                       | ND                   |                 |
| [379] | 2015 | ND       | Not available | Intestinal bacteriophage | DNA | illumina                                     | De novo | Proteus phage cluster (Siphoviridae) | Siphoviridae,   | Georgia       | European region              | Phage DNA isolation kit (NorgenBiote k) | Column-based         |                 |

1. Abi, K.M., et al., *Identification of a novel Aichivirus D in sheep*. Infect Genet Evol, 2021. **91**: p. 104810.
2. Aguirre de Cárcer, D., et al., *Biodiversity and distribution of polar freshwater DNA viruses*. Sci Adv, 2015. **1**(5): p. e1400127.
3. Al Rwahnih, M., et al., *Prunus geminivirus A: A Novel Grablovirus Infecting Prunus spp.* Plant Dis, 2018. **102**(7): p. 1246-1253.
4. Alarcón-Schumacher, T., et al., *Elucidating Viral Communities During a Phytoplankton Bloom on the West Antarctic Peninsula*. Front Microbiol, 2019. **10**: p. 1014.
5. Alarcón-Schumacher, T., et al., *Ecogenomics and Adaptation Strategies of Southern Ocean Viral Communities*. mSystems, 2021. **6**(4): p. e0039621.
6. Albariño, C.G., et al., *Novel paramyxovirus associated with severe acute febrile disease, South Sudan and Uganda, 2012*. Emerg Infect Dis, 2014. **20**(2): p. 211-6.
7. Alex, C.E., et al., *Amdoparvovirus Infection in Red Pandas ( Ailurus fulgens)*. Vet Pathol, 2018. **55**(4): p. 552-561.
8. Alex, C.E., et al., *Viruses in unexplained encephalitis cases in American black bears (Ursus americanus)*. PLoS One, 2020. **15**(12): p. e0244056.
9. Altan, E., et al., *Complex Virome in a Mesenteric Lymph Node from a Californian Sea Lion (Zalophus Californianus) with Polyserositis and Steatitis*. Viruses, 2020. **12**(8).
10. Altan, E., et al., *New Parvoviruses and Picornavirus in Tissues and Feces of Foals with Interstitial Pneumonia*. Viruses, 2021. **13**(8).
11. Altan, E., et al., *A Highly Divergent Picornavirus Infecting the Gut Epithelia of Zebrafish (Danio rerio) in Research Institutions Worldwide*. Zebrafish, 2019. **16**(3): p. 291-299.
12. Altan, E., et al., *Viruses in Horses with Neurologic and Respiratory Diseases*. Viruses, 2019. **11**(10).
13. Altan, E., et al., *Nasal virome of dogs with respiratory infection signs include novel taupapillomaviruses*. Virus Genes, 2019. **55**(2): p. 191-197.
14. Amgarten, D., et al., *Three novel Pseudomonas phages isolated from composting provide insights into the evolution and diversity of tailed phages*. BMC Genomics, 2017. **18**(1): p. 346.
15. Andreani, J., et al., *Morphological and Genomic Features of the New Klosneuvirinae Isolate Fadolivirus IHUMI-VV54*. Front Microbiol, 2021. **12**: p. 719703.
16. Anh, N.T., et al., *Viruses in Vietnamese Patients Presenting with Community-Acquired Sepsis of Unknown Cause*. J Clin Microbiol, 2019. **57**(9).
17. Arroyo Mühr, L.S., et al., *Does human papillomavirus-negative condylomata exist?* Virology, 2015. **485**: p. 283-8.
18. Aswad, A. and A. Katzourakis, *The first endogenous herpesvirus, identified in the tarsier genome, and novel sequences from primate rhadinoviruses and lymphocryptoviruses*. PLoS Genet, 2014. **10**(6): p. e1004332.
19. Aswad, A. and A. Katzourakis, *A novel viral lineage distantly related to herpesviruses discovered within fish genome sequence data*. Virus Evol, 2017. **3**(2): p. vex016.
20. Aw, T.G., A. Howe, and J.B. Rose, *Metagenomic approaches for direct and cell culture evaluation of the virological quality of wastewater*. J Virol Methods, 2014. **210**: p. 15-21.
21. Zhang, B., et al., *Viral metagenomics analysis demonstrates the diversity of viral flora in piglet diarrhoeic faeces in China*. J Gen Virol, 2014. **95**(Pt 7): p. 1603-1611.
22. Bäckström, D., et al., *Virus Genomes from Deep Sea Sediments Expand the Ocean Megavirome and Support Independent Origins of Viral Gigantism*. mBio, 2019. **10**(2).
23. Bag, S., et al., *Detection of a New Luteovirus in Imported Nectarine Trees: A Case Study to Propose Adoption of Metagenomics in Post-Entry Quarantine*. Phytopathology, 2015. **105**(6): p. 840-6.
24. Baidaliuk, A., et al., *Novel genome sequences of cell-fusing agent virus allow comparison of virus phylogeny with the genetic structure of Aedes aegypti populations*. Virus Evol, 2020. **6**(1): p. veaa018.
25. Bányai, K., et al., *Candidate new rotavirus species in Schreiber's bats, Serbia*. Infect Genet Evol, 2017. **48**: p. 19-26.
26. Barrientos-Somarribas, M., et al., *Discovering viral genomes in human metagenomic data by predicting unknown protein families*. Sci Rep, 2018. **8**(1): p. 28.
27. Beaulaurier, J., et al., *Assembly-free single-molecule sequencing recovers complete virus genomes from natural microbial communities*. Genome Res, 2020. **30**(3): p. 437-446.
28. Benites, L.F., et al., *Single cell ecogenomics reveals mating types of individual cells and ssDNA viral infections in the smallest photosynthetic eukaryotes*. Philos Trans R Soc Lond B Biol Sci, 2019. **374**(1786): p. 20190089.

29. Bertazzon, N., et al., *Two New Putative Plant Viruses from Wood Metagenomics Analysis of an Esca Diseased Vineyard*. Plants (Basel), 2020. **9**(7).
30. Birnberg, L., et al., *Viromics on Honey-Baited FTA Cards as a New Tool for the Detection of Circulating Viruses in Mosquitoes*. Viruses, 2020. **12**(3).
31. Bischoff, V., et al., *Cobaviruses - a new globally distributed phage group infecting Rhodobacteraceae in marine ecosystems*. Isme j, 2019. **13**(6): p. 1404-1421.
32. Blomström, A.L., et al., *Detection of a novel astrovirus in brain tissue of mink suffering from shaking mink syndrome by use of viral metagenomics*. J Clin Microbiol, 2010. **48**(12): p. 4392-6.
33. Blomström, A.L., et al., *Viral metagenomic analysis of bushpigs (Potamochoerus larvatus) in Uganda identifies novel variants of Porcine parvovirus 4 and Torque teno sus virus 1 and 2*. Virol J, 2012. **9**: p. 192.
34. Blomström, A.L., et al., *Viral Metagenomic Analysis Displays the Co-Infection Situation in Healthy and PMWS Affected Pigs*. PLoS One, 2016. **11**(12): p. e0166863.
35. Blomström, A.L., et al., *Novel Viruses Found in Antricola Ticks Collected in Bat Caves in the Western Amazonia of Brazil*. Viruses, 2019. **12**(1).
36. Blouin, A.G., et al., *A new virus discovered by immunocapture of double-stranded RNA, a rapid method for virus enrichment in metagenomic studies*. Mol Ecol Resour, 2016. **16**(5): p. 1255-63.
37. Bodewes, R., et al., *Identification of DNA sequences that imply a novel gammaherpesvirus in seals*. J Gen Virol, 2015. **96**(Pt 5): p. 1109-1114.
38. Bolatti, E.M., et al., *A Preliminary Study of the Virome of the South American Free-Tailed Bats (Tadarida brasiliensis) and Identification of Two Novel Mammalian Viruses*. Viruses, 2020. **12**(4).
39. Bolduc, B., et al., *Identification of novel positive-strand RNA viruses by metagenomic analysis of archaea-dominated Yellowstone hot springs*. J Virol, 2012. **86**(10): p. 5562-73.
40. Bolduc, B., et al., *Viral assemblage composition in Yellowstone acidic hot springs assessed by network analysis*. Isme j, 2015. **9**(10): p. 2162-77.
41. Boratto, P.V.M., et al., *Yaravirus: A novel 80-nm virus infecting Acanthamoeba castellanii*. Proc Natl Acad Sci U S A, 2020. **117**(28): p. 16579-16586.
42. Boros, Á., et al., *High prevalence, genetic diversity and a potentially novel genotype of Sapelovirus A (Picornaviridae) in enteric and respiratory samples in Hungarian swine farms*. J Gen Virol, 2020. **101**(6): p. 609-621.
43. Boukari, W., et al., *Occurrence of a novel mastrevirus in sugarcane germplasm collections in Florida, Guadeloupe and Réunion*. Virol J, 2017. **14**(1): p. 146.
44. Bouzalas, I.G., et al., *Neurotropic astrovirus in cattle with nonsuppurative encephalitis in Europe*. J Clin Microbiol, 2014. **52**(9): p. 3318-24.
45. Buck, C.B., et al., *The Ancient Evolutionary History of Polyomaviruses*. PLoS Pathog, 2016. **12**(4): p. e1005574.
46. Campbell, S.J., et al., *Red fox viromes in urban and rural landscapes*. Virus Evol, 2020. **6**(2): p. veaa065.
47. Candresse, T., A. Marais, and C. Faure, *First Report of Southern tomato virus on Tomatoes in Southwest France*. Plant Dis, 2013. **97**(8): p. 1124.
48. Canova, R., et al., *Spleen and lung virome analysis of South American fur seals (Arctocephalus australis) collected on the southern Brazilian coast*. Infect Genet Evol, 2021. **92**: p. 104862.
49. Cardeti, G., et al., *Fatal Outbreak in Tonkean Macaques Caused by Possibly Novel Orthopoxvirus, Italy, January 2015 (1)*. Emerg Infect Dis, 2017. **23**(12): p. 1941-1949.
50. Carradec, Q., et al., *A global ocean atlas of eukaryotic genes*. Nat Commun, 2018. **9**(1): p. 373.
51. Carrai, M., et al., *Identification of A Novel Papillomavirus Associated with Squamous Cell Carcinoma in A Domestic Cat*. Viruses, 2020. **12**(1).
52. Carvalho Costa, L., et al., *Identification and characterization of a novel virus associated with an eriophyid mite in extracts of fruit trees leaves*. Arch Virol, 2021. **166**(10): p. 2869-2873.
53. Castañeda-Mogollón, D., et al., *A metagenomics workflow for SARS-CoV-2 identification, co-pathogen detection, and overall diversity*. J Clin Virol, 2021. **145**: p. 105025.
54. Castelán-Sánchez, H.G., et al., *Intermediate-Salinity Systems at High Altitudes in the Peruvian Andes Unveil a High Diversity and Abundance of Bacteria and Viruses*. Genes (Basel), 2019. **10**(11).

55. Castrignano, S.B., et al., *Two novel circo-like viruses detected in human feces: complete genome sequencing and electron microscopy analysis*. Virus Res, 2013. **178**(2): p. 364-73.
56. Castrignano, S.B., et al., *Identification of circo-like virus-Brazil genomic sequences in raw sewage from the metropolitan area of São Paulo: evidence of circulation two and three years after the first detection*. Mem Inst Oswaldo Cruz, 2017. **112**(3): p. 175-181.
57. Cebriá-Mendoza, M., et al., *Deep viral blood metagenomics reveals extensive anellovirus diversity in healthy humans*. Sci Rep, 2021. **11**(1): p. 6921.
58. Chandler, J.A., R.M. Liu, and S.N. Bennett, *RNA shotgun metagenomic sequencing of northern California (USA) mosquitoes uncovers viruses, bacteria, and fungi*. Front Microbiol, 2015. **6**: p. 185.
59. Charles, J., et al., *Detection of novel and recognized RNA viruses in mosquitoes from the Yucatan Peninsula of Mexico using metagenomics and characterization of their in vitro host ranges*. J Gen Virol, 2018. **99**(12): p. 1729-1738.
60. Cheung, A.K., et al., *A divergent clade of circular single-stranded DNA viruses from pig feces*. Arch Virol, 2013. **158**(10): p. 2157-62.
61. Cholleti, H., et al., *Discovery of Novel Viruses in Mosquitoes from the Zambezi Valley of Mozambique*. PLoS One, 2016. **11**(9): p. e0162751.
62. Chong, R., et al., *Fecal Viral Diversity of Captive and Wild Tasmanian Devils Characterized Using Virion-Enriched Metagenomics and Metatranscriptomics*. J Virol, 2019. **93**(11).
63. Cibulski, S., et al., *Viral metagenomics in Brazilian Pekin ducks identifies two gyrovirus, including a new species, and the potentially pathogenic duck circovirus*. Virology, 2020. **548**: p. 101-108.
64. Cibulski, S., et al., *A plate of viruses: Viral metagenomics of supermarket chicken, pork and beef from Brazil*. Virology, 2021. **552**: p. 1-9.
65. Claverie, S., et al., *Exploring the diversity of Poaceae-infecting mastreviruses on Reunion Island using a viral metagenomics-based approach*. Sci Rep, 2019. **9**(1): p. 12716.
66. Coffey, L.L., et al., *Enhanced arbovirus surveillance with deep sequencing: Identification of novel rhabdoviruses and bunyaviruses in Australian mosquitoes*. Virology, 2014. **448**: p. 146-58.
67. Conceição-Neto, N., et al., *Viral gut metagenomics of sympatric wild and domestic canids, and monitoring of viruses: Insights from an endangered wolf population*. Ecol Evol, 2017. **7**(12): p. 4135-4146.
68. Correa, A.M., et al., *Viral Outbreak in Corals Associated with an In Situ Bleaching Event: Atypical Herpes-Like Viruses and a New Megavirus Infecting Symbiodinium*. Front Microbiol, 2016. **7**: p. 127.
69. Coutinho, F.H., R.A. Edwards, and F. Rodríguez-Valera, *Charting the diversity of uncultured viruses of Archaea and Bacteria*. BMC Biol, 2019. **17**(1): p. 109.
70. Crane, A., et al., *Novel anelloviruses identified in buccal swabs of Antarctic fur seals*. Virus Genes, 2018. **54**(5): p. 719-723.
71. Wang, D., et al., *First report of Sida leaf curl virus and associated betasatellite in tobacco*. Plant Dis, 2021.
72. Zhang, D., et al., *Isolation and Characterization of the First Freshwater Cyanophage Infecting Pseudanabaena*. J Virol, 2020. **94**(17).
73. da Silva Neves, N.A., et al., *Sialovirome of Brazilian tropical anophelines*. Virus Res, 2021. **302**: p. 198494.
74. Dacheux, L., et al., *A preliminary study of viral metagenomics of French bat species in contact with humans: identification of new mammalian viruses*. PLoS One, 2014. **9**(1): p. e87194.
75. Dai, Z., et al., *Identification of a novel circovirus in blood sample of giant pandas (Ailuropoda melanoleuca)*. Infect Genet Evol, 2021. **95**: p. 105077.
76. Dai, Z., et al., *Identification and characterization of a novel bocaparvovirus in tufted deer (Elaphodus cephalophus) in China*. Arch Virol, 2021: p. 1-6.
77. Daugrois, J.H., et al., *Comparison of the Virome of Quarantined Sugarcane Varieties and the Virome of Grasses Growing near the Quarantine Station*. Viruses, 2021. **13**(5).
78. Dayaram, A., et al., *Molecular characterisation of a novel cassava associated circular ssDNA virus*. Virus Res, 2012. **166**(1-2): p. 130-5.
79. Dayaram, A., et al., *Novel circular DNA viruses identified in Procordulia grayi and Xanthocnemis zealandica larvae using metagenomic approaches*. Infect Genet Evol, 2014. **22**: p. 134-41.

80. de Nazaré Almeida Dos Reis, L., et al., *Metagenomics of Neotropical Single-Stranded DNA Viruses in Tomato Cultivars with and without the Ty-1 Gene*. Viruses, 2020. **12**(8).
81. de Souza, W.M., et al., *Pingu virus: A new picornavirus in penguins from Antarctica*. Virus Evol, 2019. **5**(2): p. vez047.
82. Deaton, J., F.B. Yu, and S.R. Quake, *Mini-Metagenomics and Nucleotide Composition Aid the Identification and Host Association of Novel Bacteriophage Sequences*. Adv Biosyst, 2019. **3**(11): p. e1900108.
83. Deboutte, W., et al., *Honey-bee-associated prokaryotic viral communities reveal wide viral diversity and a profound metabolic coding potential*. Proc Natl Acad Sci U S A, 2020. **117**(19): p. 10511-10519.
84. Dela Cruz, F.N., Jr., et al., *A novel pulmonary polyomavirus in alpacas (Vicugna pacos)*. Vet Microbiol, 2017. **201**: p. 49-55.
85. Deng, L., et al., *Viral tagging reveals discrete populations in Synechococcus viral genome sequence space*. Nature, 2014. **513**(7517): p. 242-5.
86. Dennis, T.P.W., et al., *Insights into Circovirus Host Range from the Genomic Fossil Record*. J Virol, 2018. **92**(16).
87. Devaney, R., et al., *A metagenomic comparison of endemic viruses from broiler chickens with runting-stunting syndrome and from normal birds*. Avian Pathol, 2016. **45**(6): p. 616-629.
88. Diemer, G.S. and K.M. Stedman, *A novel virus genome discovered in an extreme environment suggests recombination between unrelated groups of RNA and DNA viruses*. Biol Direct, 2012. **7**: p. 13.
89. Dill, J.A., et al., *Microscopic and Molecular Evidence of the First Elasmobranch Adomavirus, the Cause of Skin Disease in a Giant Guitarfish, Rhynchobatus djiddensis*. mBio, 2018. **9**(3).
90. Divers, T.J., et al., *New Parvovirus Associated with Serum Hepatitis in Horses after Inoculation of Common Biological Product*. Emerg Infect Dis, 2018. **24**(2): p. 303-310.
91. Ducatez, M.F. and J.L. Guérin, *Identification of a novel coronavirus from guinea fowl using metagenomics*. Methods Mol Biol, 2015. **1282**: p. 27-31.
92. Dumarest, M., et al., *Viral diversity in swine intestinal mucus used for the manufacture of heparin as analyzed by high-throughput sequencing*. Biologicals, 2015. **43**(1): p. 31-6.
93. Dunlap, D.S., et al., *Molecular and microscopic evidence of viruses in marine copepods*. Proc Natl Acad Sci U S A, 2013. **110**(4): p. 1375-80.
94. Duraisamy, R., et al., *Detection of novel RNA viruses from free-living gorillas, Republic of the Congo: genetic diversity of picobirnaviruses*. Virus Genes, 2018. **54**(2): p. 256-271.
95. Dutilh, B.E., et al., *A highly abundant bacteriophage discovered in the unknown sequences of human faecal metagenomes*. Nat Commun, 2014. **5**: p. 4498.
96. Edridge, A.W.D., et al., *Novel Orthobunyavirus Identified in the Cerebrospinal Fluid of a Ugandan Child With Severe Encephalopathy*. Clin Infect Dis, 2019. **68**(1): p. 139-142.
97. Eibach, D., et al., *Viral metagenomics revealed novel betatorquevirus species in pediatric inpatients with encephalitis/meningoencephalitis from Ghana*. Sci Rep, 2019. **9**(1): p. 2360.
98. Emmerich, P., et al., *Viral metagenomics, genetic and evolutionary characteristics of Crimean-Congo hemorrhagic fever orthonairovirus in humans, Kosovo*. Infect Genet Evol, 2018. **65**: p. 6-11.
99. Yang, F., et al., *[Metagenomic analysis of bat virome in several Chinese regions]*. Sheng Wu Gong Cheng Xue Bao, 2013. **29**(5): p. 586-600.
100. Fahsbender, E., et al., *Chapparrovirus DNA Found in 4% of Dogs with Diarrhea*. Viruses, 2019. **11**(5).
101. Fahsbender, E., et al., *Plasma virome of 781 Brazilians with unexplained symptoms of arbovirus infection include a novel parvovirus and densovirus*. PLoS One, 2020. **15**(3): p. e0229993.
102. Faizah, A.N., et al., *Deciphering the Virome of Culex vishnui Subgroup Mosquitoes, the Major Vectors of Japanese Encephalitis, in Japan*. Viruses, 2020. **12**(3).
103. Fauver, J.R., et al., *West African Anopheles gambiae mosquitoes harbor a taxonomically diverse virome including new insect-specific flaviviruses, mononegaviruses, and totiviruses*. Virology, 2016. **498**: p. 288-299.

104. Fehér, E., et al., *Genomic Diversity of CRESS DNA Viruses in the Eukaryotic Virome of Swine Feces*. Microorganisms, 2021. **9**(7).
105. Feng, C., et al., *Identification of the Viral Determinant of Hypovirulence and Host Range in Sclerotiniaceae of a Genomovirus Reconstructed from the Plant Metagenome*. J Virol, 2021. **95**(17): p. e0026421.
106. Fernandez-Cassi, X., et al., *A metagenomic assessment of viral contamination on fresh parsley plants irrigated with fecally tainted river water*. Int J Food Microbiol, 2017. **257**: p. 80-90.
107. Fernández-Correa, I., et al., *A novel group of avian astroviruses from Neotropical passerine birds broaden the diversity and host range of Astroviridae*. Sci Rep, 2019. **9**(1): p. 9513.
108. Filipa-Silva, A., et al., *The Unexplored Virome of Two Atlantic Coast Fish: Contribution of Next-Generation Sequencing to Fish Virology*. Foods, 2020. **9**(11).
109. Filloux, D., et al., *Metagenomics Approaches Based on Virion-Associated Nucleic Acids (VANA): An Innovative Tool for Assessing Without A Priori Viral Diversity of Plants*. Methods Mol Biol, 2015. **1302**: p. 249-57.
110. Filloux, D., et al., *Viral Metagenomic-Based Screening of Sugarcane from Florida Reveals Occurrence of Six Sugarcane-Infecting Viruses and High Prevalence of Sugarcane yellow leaf virus*. Plant Dis, 2018. **102**(11): p. 2317-2323.
111. Fitzgerald, C.B., et al., *Probing the "Dark Matter" of the Human Gut Phageome: Culture Assisted Metagenomics Enables Rapid Discovery and Host-Linking for Novel Bacteriophages*. Front Cell Infect Microbiol, 2021. **11**: p. 616918.
112. Fontenele, R.S., et al., *Discovery of the first maize-infecting mastrevirus in the Americas using a vector-enabled metagenomics approach*. Arch Virol, 2018. **163**(1): p. 263-267.
113. Fontenele, R.S., et al., *Single Stranded DNA Viruses Associated with Capybara Faeces Sampled in Brazil*. Viruses, 2019. **11**(8).
114. Font-Verdera, F., et al., *Inverted microbial community stratification and spatial-temporal stability in hypersaline anaerobic sediments from the S'Avall solar salterns*. Syst Appl Microbiol, 2021. **44**(5): p. 126231.
115. François, S., et al., *A New Prevalent Densovirus Discovered in Acari. Insight from Metagenomics in Viral Communities Associated with Two-Spotted Mite (Tetranychus urticae) Populations*. Viruses, 2019. **11**(3).
116. François, S., et al., *Characterisation of the Viral Community Associated with the Alfalfa Weevil (Hypera postica) and Its Host Plant, Alfalfa (Medicago sativa)*. Viruses, 2021. **13**(5).
117. Frey, K.G., et al., *Bioinformatic Characterization of Mosquito Viromes within the Eastern United States and Puerto Rico: Discovery of Novel Viruses*. Evol Bioinform Online, 2016. **12**(Suppl 2): p. 1-12.
118. Wang, G., et al., *Identification and genome analysis of a novel picornavirus from captive belugas (Delphinapterus leucas) in China*. Sci Rep, 2021. **11**(1): p. 21018.
119. Zhao, G., et al., *VirusSeeker, a computational pipeline for virus discovery and virome composition analysis*. Virology, 2017. **503**: p. 21-30.
120. Galbraith, D.A., et al., *Investigating the viral ecology of global bee communities with high-throughput metagenomics*. Sci Rep, 2018. **8**(1): p. 8879.
121. Gallet, R., et al., *Nanovirus-alphasatellite complex identified in Vicia cracca in the Rhône delta region of France*. Arch Virol, 2018. **163**(3): p. 695-700.
122. Ge, X., et al., *Viral metagenomics analysis of planktonic viruses in East Lake, Wuhan, China*. Virol Sin, 2013. **28**(5): p. 280-90.
123. Geoghegan, J.L., et al., *Virome composition in marine fish revealed by meta-transcriptomics*. Virus Evol, 2021. **7**(1): p. veab005.
124. Gong, C., et al., *Novel Virophages Discovered in a Freshwater Lake in China*. Front Microbiol, 2016. **7**: p. 5.
125. Gonzales-Gustavson, E., et al., *Identification of sapovirus GV.2, astrovirus VA3 and novel anelloviruses in serum from patients with acute hepatitis of unknown aetiology*. PLoS One, 2017. **12**(10): p. e0185911.
126. Guajardo-Leiva, S., et al., *Active Crossfire Between Cyanobacteria and Cyanophages in Phototrophic Mat Communities Within Hot Springs*. Front Microbiol, 2018. **9**: p. 2039.
127. Guajardo-Leiva, S., et al., *Metagenomic Insights into the Sewage RNA Virosphere of a Large City*. Viruses, 2020. **12**(9).
128. Gulino, K., et al., *Initial Mapping of the New York City Wastewater Virome*. mSystems, 2020. **5**(3).

129. Guo, L., et al., *Viral metagenomics analysis of feces from coronary heart disease patients reveals the genetic diversity of the Microviridae*. Virol Sin, 2017. **32**(2): p. 130-138.
130. Li, H., et al., *A novel anellovirus from hospitalized neonates*. Arch Virol, 2021. **166**(9): p. 2623-2625.
131. Kim, H.R., et al., *Identification of a picornavirus from chickens with transmissible viral proventriculitis using metagenomic analysis*. Arch Virol, 2015. **160**(3): p. 701-9.
132. Wang, H., et al., *Gut virome of mammals and birds reveals high genetic diversity of the family Microviridae*. Virus Evol, 2019. **5**(1): p. vez013.
133. Wang, H., et al., *Variations among Viruses in Influent Water and Effluent Water at a Wastewater Plant over One Year as Assessed by Quantitative PCR and Metagenomics*. Appl Environ Microbiol, 2020. **86**(24).
134. Halary, S., et al., *Novel Single-Stranded DNA Circular Viruses in Pericardial Fluid of Patient with Recurrent Pericarditis*. Emerg Infect Dis, 2016. **22**(10): p. 1839-41.
135. Hall, R.J., et al., *New alphacoronavirus in Mystacina tuberculata bats, New Zealand*. Emerg Infect Dis, 2014. **20**(4): p. 697-700.
136. Han, Z., et al., *The Husavirus Posa-Like Viruses in China, and a New Group of Picornavirales*. Viruses, 2020. **12**(9).
137. Hansen, T.A., et al., *New Type of Papillomavirus and Novel Circular Single Stranded DNA Virus Discovered in Urban Rattus norvegicus Using Circular DNA Enrichment and Metagenomics*. PLoS One, 2015. **10**(11): p. e0141952.
138. Hargitai, R., et al., *Detection and genetic characterization of a novel parvovirus distantly related to human bufavirus in domestic pigs*. Arch Virol, 2016. **161**(4): p. 1033-7.
139. Hargitai, R., et al., *Detection and genetic characterization of a novel parvovirus (family Parvoviridae) in barn owls (Tyto alba) in Hungary*. Arch Virol, 2021. **166**(1): p. 231-236.
140. Hargitai, R., et al., *Novel picornavirus (family Picornaviridae) from freshwater fishes (Perca fluviatilis, Sander lucioperca, and Ameiurus melas) in Hungary*. Arch Virol, 2021. **166**(9): p. 2627-2632.
141. Harvey, E., et al., *Extensive Diversity of RNA Viruses in Australian Ticks*. J Virol, 2019. **93**(3).
142. Hayer, J., et al., *Four novel picornaviruses detected in Magellanic Penguins (Spheniscus magellanicus) in Chile*. Virology, 2021. **560**: p. 116-123.
143. He, B., et al., *Virome profiling of bats from Myanmar by metagenomic analysis of tissue samples reveals more novel Mammalian viruses*. PLoS One, 2013. **8**(4): p. e61950.
144. He, B., et al., *Characterization of a novel G3P[3] rotavirus isolated from a lesser horseshoe bat: a distant relative of feline/canine rotaviruses*. J Virol, 2013. **87**(22): p. 12357-66.
145. Hily, J.M., et al., *A genome-wide diversity study of grapevine rupestris stem pitting-associated virus*. Arch Virol, 2018. **163**(11): p. 3105-3111.
146. Hochstein, R.A., et al., *Acidianus Tailed Spindle Virus: a New Archaeal Large Tailed Spindle Virus Discovered by Culture-Independent Methods*. J Virol, 2016. **90**(7): p. 3458-68.
147. Holtz, L.R., et al., *Geographic variation in the eukaryotic virome of human diarrhea*. Virology, 2014. **468-470**: p. 556-564.
148. Houldcroft, C.J., et al., *Identification of novel adenovirus genotype 90 in children from Bangladesh*. Microb Genom, 2018. **4**(10).
149. Hui, A., et al., *Circovirus in Blood of a Febrile Horse with Hepatitis*. Viruses, 2021. **13**(5).
150. Wang, J., et al., *Identification of a novel bocaparvovirus in a wild squirrel in Kunming, Yunnan Province, China*. Arch Virol, 2020. **165**(6): p. 1469-1474.
151. Yang, J., et al., *Viral metagenomic identification of a novel anellovirus in blood sample of a child with atopic dermatitis*. J Med Virol, 2021. **93**(6): p. 4038-4041.
152. Jackson, E.W., et al., *Novel Circular Single-Stranded DNA Viruses among an Asteroid, Echinoid and Holothurian (Phylum: Echinodermata)*. PLoS One, 2016. **11**(11): p. e0166093.
153. Jackson, E.W., et al., *A Highly Prevalent and Pervasive Densovirus Discovered among Sea Stars from the North American Atlantic Coast*. Appl Environ Microbiol, 2020. **86**(6).
154. Jin, M., et al., *Diversities and potential biogeochemical impacts of mangrove soil viruses*. Microbiome, 2019. **7**(1): p. 58.
155. Jo, Y., et al., *Comparative Microbiome Study of Mummified Peach Fruits by Metagenomics and Metatranscriptomics*. Plants (Basel), 2020. **9**(8).

156. Kallies, R., et al., *Evaluation of Sequencing Library Preparation Protocols for Viral Metagenomic Analysis from Pristine Aquifer Groundwaters*. *Viruses*, 2019. **11**(6).
157. Kapusinszky, B., et al., *Local Virus Extinctions following a Host Population Bottleneck*. *J Virol*, 2015. **89**(16): p. 8152-61.
158. Katsuta, R., et al., *First identification of Sapoviruses in wild boar*. *Virus Res*, 2019. **271**: p. 197680.
159. Kauer, R.V., et al., *Discovery of novel astrovirus genotype species in small ruminants*. *PeerJ*, 2019. **7**: p. e7338.
160. Kemenesi, G., et al., *Genetic diversity and recombination within bufaviruses: Detection of a novel strain in Hungarian bats*. *Infect Genet Evol*, 2015. **33**: p. 288-92.
161. Kinoti, W.M., et al., *Generic Amplicon Deep Sequencing to Determine Ilarvirus Species Diversity in Australian Prunus*. *Front Microbiol*, 2017. **8**: p. 1219.
162. Kocher, J.F., et al., *Bat Caliciviruses and Human Noroviruses Are Antigenically Similar and Have Overlapping Histo-Blood Group Antigen Binding Profiles*. *mBio*, 2018. **9**(3).
163. Kothari, A., et al., *Ecogenomics of Groundwater Phages Suggests Niche Differentiation Linked to Specific Environmental Tolerance*. *mSystems*, 2021. **6**(3): p. e0053721.
164. Kowarsky, M., et al., *Numerous uncharacterized and highly divergent microbes which colonize humans are revealed by circulating cell-free DNA*. *Proc Natl Acad Sci U S A*, 2017. **114**(36): p. 9623-9628.
165. Kraberger, S., et al., *Diverse single-stranded DNA viruses associated with honey bees (*Apis mellifera*)*. *Infect Genet Evol*, 2019. **71**: p. 179-188.
166. Kraberger, S., et al., *Unravelling the Single-Stranded DNA Virome of the New Zealand Blackfly*. *Viruses*, 2019. **11**(6).
167. Kumar, D., et al., *Metagenomic Next-Generation Sequencing Reveal Presence of a Novel Ungulate Bocaparvovirus in Alpacas*. *Viruses*, 2019. **11**(8).
168. Li, L., et al., *Bat guano virome: predominance of dietary viruses from insects and plants plus novel mammalian viruses*. *J Virol*, 2010. **84**(14): p. 6955-65.
169. Li, L., et al., *Divergent astrovirus associated with neurologic disease in cattle*. *Emerg Infect Dis*, 2013. **19**(9): p. 1385-92.
170. Li, L., et al., *Exploring the virome of diseased horses*. *J Gen Virol*, 2015. **96**(9): p. 2721-2733.
171. Li, L., et al., *Viruses in diarrhoeic dogs include novel kobuviruses and sapoviruses*. *J Gen Virol*, 2011. **92**(Pt 11): p. 2534-2541.
172. Li, L., et al., *Novel amdovirus in gray foxes*. *Emerg Infect Dis*, 2011. **17**(10): p. 1876-8.
173. Xu, L., et al., *Characterization of the nasopharyngeal viral microbiome from children with community-acquired pneumonia but negative for Luminex xTAG respiratory viral panel assay detection*. *J Med Virol*, 2017. **89**(12): p. 2098-2107.
174. Langat, S.K., et al., *Profiling of RNA Viruses in Biting Midges (*Ceratopogonidae*) and Related Diptera from Kenya Using Metagenomics and Metabarcoding Analysis*. *mSphere*, 2021. **6**(5): p. e0055121.
175. Law, J., et al., *Identification of hepatotropic viruses from plasma using deep sequencing: a next generation diagnostic tool*. *PLoS One*, 2013. **8**(4): p. e60595.
176. Lazov, C.M., et al., *Full-Genome Sequences of Alphacoronaviruses and Astroviruses from Myotis and Pipistrelle Bats in Denmark*. *Viruses*, 2021. **13**(6).
177. Leigh, B.A., et al., *Finer-Scale Phylosymbiosis: Insights from Insect Viromes*. *mSystems*, 2018. **3**(6).
178. Levin, S., et al., *New Viruses from the Ectoparasite Mite Varroa destructor Infesting Apis mellifera and Apis cerana*. *Viruses*, 2019. **11**(2).
179. Liais, E., et al., *Novel avian coronavirus and fulminating disease in guinea fowl, France*. *Emerg Infect Dis*, 2014. **20**(1): p. 105-8.
180. Lima, D.A., et al., *The intestinal virome of malabsorption syndrome-affected and unaffected broilers through shotgun metagenomics*. *Virus Res*, 2019. **261**: p. 9-20.
181. Ling, Y., et al., *Viral metagenomics reveals significant viruses in the genital tract of apparently healthy dairy cows*. *Arch Virol*, 2019. **164**(4): p. 1059-1067.
182. Liu, Z., et al., *Identification of a novel human papillomavirus by metagenomic analysis of vaginal swab samples from pregnant women*. *Virol J*, 2016. **13**: p. 122.
183. M, A.D., et al., *Faecal Virome Analysis of Wild Animals from Brazil*. *Viruses*, 2019. **11**(9).
184. Ma, Y., et al., *A human gut phage catalog correlates the gut phageome with type 2 diabetes*. *Microbiome*, 2018. **6**(1): p. 24.
185. Ma, Y., et al., *Phytovirome Analysis of Wild Plant Populations: Comparison of Double-Stranded RNA and Virion-Associated Nucleic Acid Metagenomic Approaches*. *J Virol*, 2019. **94**(1).
186. Ma, Y., et al., *Metagenomic analysis of virome cross-talk between cultivated Solanum lycopersicum and wild Solanum nigrum*. *Virology*, 2020. **540**: p. 38-44.
187. Mahmood, A., et al., *Viral Metagenomics Revealed a Novel Cardiovirus in Feces of Wild Rats*. *Intervirology*, 2019. **62**(1): p. 45-50.



188. Maia, L.M.S., et al., *Novel Viruses in Mosquitoes from Brazilian Pantanal*. *Viruses*, 2019. **11**(10).
189. Masuda, T., et al., *Identification of novel bovine group A rotavirus G15P[14] strain from epizootic diarrhea of adult cows by de novo sequencing using a next-generation sequencer*. *Vet Microbiol*, 2014. **171**(1-2): p. 66-73.
190. Masuda, T., et al., *Whole genome analysis of a novel picornavirus related to the Enterovirus/Sapelovirus supergroup from porcine feces in Japan*. *Virus Res*, 2018. **257**: p. 68-73.
191. Mihalov-Kovács, E., et al., *Candidate new rotavirus species in sheltered dogs, Hungary*. *Emerg Infect Dis*, 2015. **21**(4): p. 660-3.
192. Minot, S., et al., *Rapid evolution of the human gut virome*. *Proc Natl Acad Sci U S A*, 2013. **110**(30): p. 12450-5.
193. Miranda, J.A., et al., *RNA viruses as major contributors to Antarctic viroplankton*. *Environ Microbiol*, 2016. **18**(11): p. 3714-3727.
194. Mitchell, A.B., et al., *High Resolution Metatranscriptomic Characterization of the Pulmonary RNA Virome After Lung Transplantation*. *Transplantation*, 2021.
195. Mizuno, C.M., et al., *Expanding the marine virosphere using metagenomics*. *PLoS Genet*, 2013. **9**(12): p. e1003987.
196. Mizuno, C.M., et al., *Genomes of Abundant and Widespread Viruses from the Deep Ocean*. *mBio*, 2016. **7**(4).
197. Møllerup, S., et al., *Cutavirus in Cutaneous Malignant Melanoma*. *Emerg Infect Dis*, 2017. **23**(2): p. 363-365.
198. Molnár, J., et al., *Identification of a novel archaea virus, detected in hydrocarbon polluted Hungarian and Canadian samples*. *PLoS One*, 2020. **15**(4): p. e0231864.
199. Moutailler, S., et al., *Diversity of viruses in Ixodes ricinus, and characterization of a neurotropic strain of Eyach virus*. *New Microbes New Infect*, 2016. **11**: p. 71-81.
200. Mozar, M. and J.M. Claverie, *Expanding the Mimiviridae family using asparagine synthase as a sequence bait*. *Virology*, 2014. **466-467**: p. 112-22.
201. Mukai, Y., et al., *Identification of a distinct lineage of aviadenovirus from crane feces*. *Virus Genes*, 2019. **55**(6): p. 815-824.
202. Mushegian, A., A. Shipunov, and S.F. Elena, *Changes in the composition of the RNA virome mark evolutionary transitions in green plants*. *BMC Biol*, 2016. **14**: p. 68.
203. Nagai, M., et al., *Identification and complete genome analysis of a novel bovine picornavirus in Japan*. *Virus Res*, 2015. **210**: p. 205-12.
204. Naoi, Y., et al., *Characterization and phylogenetic analysis of a novel picornavirus from swine feces in Japan*. *Arch Virol*, 2016. **161**(6): p. 1685-90.
205. Nebbak, A., et al., *Virome Diversity among Mosquito Populations in a Sub-Urban Region of Marseille, France*. *Viruses*, 2021. **13**(5).
206. Nemchinov, L.G., et al., *Characterization of alfalfa virus F, a new member of the genus Marafivirus*. *PLoS One*, 2018. **13**(9): p. e0203477.
207. Nery, F.M.B., et al., *Molecular Characterization of Hovenia Dulcis-Associated Virus 1 (HDaV1) and 2 (HDaV2): New Tentative Species within the Order Picornavirales*. *Viruses*, 2020. **12**(9).
208. Nishimura, Y., et al., *Environmental Viral Genomes Shed New Light on Virus-Host Interactions in the Ocean*. *mSphere*, 2017. **2**(2).
209. Nouri, S., et al., *Diverse Array of New Viral Sequences Identified in Worldwide Populations of the Asian Citrus Psyllid (Diaphorina citri) Using Viral Metagenomics*. *J Virol*, 2015. **90**(5): p. 2434-45.
210. Oba, M., et al., *Metagenomic identification and sequence analysis of a Teschovirus A-related virus in porcine feces in Japan, 2014-2016*. *Infect Genet Evol*, 2018. **66**: p. 210-216.
211. Oh, S., D. Yoo, and W.T. Liu, *Metagenomics Reveals a Novel Virophage Population in a Tibetan Mountain Lake*. *Microbes Environ*, 2016. **31**(2): p. 173-7.
212. Öhlund, P., et al., *Viromics Reveal a Number of Novel RNA Viruses in Swedish Mosquitoes*. *Viruses*, 2019. **11**(11).
213. Öncü, C., et al., *West Nile virus, Anopheles flavivirus, a novel flavivirus as well as Merida-like rhabdovirus Turkey in field-collected mosquitoes from Thrace and Anatolia*. *Infect Genet Evol*, 2018. **57**: p. 36-45.
214. Orton, J.P., et al., *Virus Discovery in Desert Tortoise Fecal Samples: Novel Circular Single-Stranded DNA Viruses*. *Viruses*, 2020. **12**(2).
215. Chen, P., et al., *Revealing the full biosphere structure and versatile metabolic functions in the deepest ocean sediment of the Challenger Deep*. *Genome Biol*, 2021. **22**(1): p. 207.
216. Palanga, E., et al., *Metagenomic-Based Screening and Molecular Characterization of Cowpea-Infecting Viruses in Burkina Faso*. *PLoS One*, 2016. **11**(10): p. e0165188.
217. Pan, S., et al., *Identification of a Torque Teno Mini Virus (TTMV) in Hodgkin's Lymphoma Patients*. *Front Microbiol*, 2018. **9**: p. 1680.
218. Pankovics, P., et al., *Detection of a mammalian-like astrovirus in bird, European roller (Coracias garrulus)*. *Infect Genet Evol*, 2015. **34**: p. 114-21.

219. Pankovics, P., et al., *A novel passerivirus (family Picornaviridae) in an outbreak of enteritis with high mortality in estrildid finches (Uraeginthus sp.)*. Arch Virol, 2018. **163**(4): p. 1063-1071.
220. Pearson, V.M., S.B. Caudle, and D.R. Rokytá, *Viral recombination blurs taxonomic lines: examination of single-stranded DNA viruses in a wastewater treatment plant*. PeerJ, 2016. **4**: p. e2585.
221. Pérez-Sautu, U., et al., *Novel viruses in hard ticks collected in the Republic of Korea unveiled by metagenomic high-throughput sequencing analysis*. Ticks Tick Borne Dis, 2021. **12**(6): p. 101820.
222. Petersen, A., et al., *Field samplings of Ixodes ricinus ticks from a tick-borne encephalitis virus micro-focus in Northern Zealand, Denmark*. Ticks Tick Borne Dis, 2019. **10**(5): p. 1028-1032.
223. Pfaff, F., et al., *A novel astrovirus associated with encephalitis and ganglionitis in domestic sheep*. Transbound Emerg Dis, 2017. **64**(3): p. 677-682.
224. Pfreundt, U., et al., *Genome of a giant bacteriophage from a decaying Trichodesmium bloom*. Mar Genomics, 2017. **33**: p. 21-25.
225. Phan, T.G., et al., *Sera of Peruvians with fever of unknown origins include viral nucleic acids from non-vertebrate hosts*. Virus Genes, 2018. **54**(1): p. 33-40.
226. Phan, T.G., et al., *The fecal virome of South and Central American children with diarrhea includes small circular DNA viral genomes of unknown origin*. Arch Virol, 2016. **161**(4): p. 959-66.
227. Phan, T.G., et al., *A new protoparvovirus in human fecal samples and cutaneous T cell lymphomas (mycosis fungoides)*. Virology, 2016. **496**: p. 299-305.
228. Phan, T.G., et al., *Detection of a novel circovirus PCV3 in pigs with cardiac and multi-systemic inflammation*. Virol J, 2016. **13**(1): p. 184.
229. Phan, T.G., et al., *Cyclovirus in nasopharyngeal aspirates of Chilean children with respiratory infections*. J Gen Virol, 2014. **95**(Pt 4): p. 922-927.
230. Phan, T.G., et al., *New astrovirus in human feces from Burkina Faso*. J Clin Virol, 2014. **60**(2): p. 161-4.
231. Plyusnin, I., et al., *Novel NGS pipeline for virus discovery from a wide spectrum of hosts and sample types*. Virus Evol, 2020. **6**(2): p. veaa091.
232. Popgeorgiev, N., et al., *Marseillevirus-like virus recovered from blood donated by asymptomatic humans*. J Infect Dis, 2013. **208**(7): p. 1042-50.
233. Porter, A.F., et al., *Novel hepaci- and pegi-like viruses in native Australian wildlife and non-human primates*. Virus Evol, 2020. **6**(2): p. veaa064.
234. Pyke, A.T., et al., *Uncovering the genetic diversity within the Aedes notoscriptus virome and isolation of new viruses from this highly urbanised and invasive mosquito*. Virus Evol, 2021. **7**(2): p. veab082.
235. Liu, Q., et al., *Viral metagenomics revealed diverse CRESS-DNA virus genomes in faeces of forest musk deer*. Virol J, 2020. **17**(1): p. 61.
236. Qi, D., et al., *A novel polyomavirus from the nasal cavity of a giant panda (Ailuropoda melanoleuca)*. Virol J, 2017. **14**(1): p. 207.
237. Qiu, L., et al., *Characterization of a new member of Iridoviridae, Shrimp hemocyte iridescent virus (SHIV), found in white leg shrimp (Litopenaeus vannamei)*. Sci Rep, 2017. **7**(1): p. 11834.
238. Quaiser, A., et al., *Diversity and comparative genomics of Microviridae in Sphagnum- dominated peatlands*. Front Microbiol, 2015. **6**: p. 375.
239. Quaiser, A., et al., *Diversity and comparative genomics of chimeric viruses in Sphagnum-dominated peatlands*. Virus Evol, 2016. **2**(2): p. vew025.
240. Ramírez, A.L., et al., *Metagenomic Analysis of the Virome of Mosquito Excreta*. mSphere, 2020. **5**(5).
241. Ramírez-Martínez, M.M., et al., *Bat Flies of the Family Streblidae (Diptera: Hippoboscoidea) Host Relatives of Medically and Agriculturally Important "Bat-Associated" Viruses*. Viruses, 2021. **13**(5).
242. Rastrojo, A., et al., *A New Putative Caulimoviridae Genus Discovered through Air Metagenomics*. Microbiol Resour Announc, 2018. **7**(14).
243. Remnant, E.J., et al., *A Diverse Range of Novel RNA Viruses in Geographically Distinct Honey Bee Populations*. J Virol, 2017. **91**(16).
244. Reuter, G., et al., *Novel seadornavirus (family Reoviridae) related to Banna virus in Europe*. Arch Virol, 2013. **158**(10): p. 2163-7.
245. Reuter, G., et al., *Novel dicistrovirus from bat guano*. Arch Virol, 2014. **159**(12): p. 3453-6.
246. Reuter, G., et al., *Detection of a novel RNA virus with hepatitis E virus-like non-structural genome organization in amphibian, agile frog (Rana dalmatina) tadpoles*. Infect Genet Evol, 2018. **65**: p. 112-116.

247. Reuter, G., et al., *Detection and complete genome characterization of a novel RNA virus related to members of the Hepe-Virga clade in bird species, hoopoe (Upupa epops)*. Infect Genet Evol, 2020. **81**: p. 104236.
248. Reuter, G., et al., *A highly divergent picornavirus in an amphibian, the smooth newt (Lissotriton vulgaris)*. J Gen Virol, 2015. **96**(9): p. 2607-2613.
249. Reuter, G., et al., *A novel posavirus-related single-stranded RNA virus from fish (Cyprinus carpio)*. Arch Virol, 2015. **160**(2): p. 565-8.
250. Richard, J.C., et al., *Mass mortality in freshwater mussels (Actinonaias pectorosa) in the Clinch River, USA, linked to a novel densovirus*. Sci Rep, 2020. **10**(1): p. 14498.
251. Richet, C., et al., *Novel circular DNA viruses associated with Apiaceae and Poaceae from South Africa and New Zealand*. Arch Virol, 2019. **164**(1): p. 237-242.
252. Rodriguez, C., et al., *Fatal Encephalitis Caused by Cristoli Virus, an Emerging Orthobunyavirus, France*. Emerg Infect Dis, 2020. **26**(6): p. 1287-1290.
253. Roediger, B., et al., *An Atypical Parvovirus Drives Chronic Tubulointerstitial Nephropathy and Kidney Fibrosis*. Cell, 2018. **175**(2): p. 530-543.e24.
254. Roossinck, M.J., et al., *Ecogenomics: using massively parallel pyrosequencing to understand virus ecology*. Mol Ecol, 2010. **19 Suppl 1**: p. 81-8.
255. Rosario, K., S. Duffy, and M. Breitbart, *Diverse circovirus-like genome architectures revealed by environmental metagenomics*. J Gen Virol, 2009. **90**(Pt 10): p. 2418-2424.
256. Rosario, K., et al., *Dragonfly cyclovirus, a novel single-stranded DNA virus discovered in dragonflies (Odonata: Anisoptera)*. J Gen Virol, 2011. **92**(Pt 6): p. 1302-1308.
257. Rosario, K., et al., *Discovery of a novel mastrevirus and alphasatellite-like circular DNA in dragonflies (Epirocta) from Puerto Rico*. Virus Res, 2013. **171**(1): p. 231-7.
258. Rosario, K., et al., *Novel circular single-stranded DNA viruses identified in marine invertebrates reveal high sequence diversity and consistent predicted intrinsic disorder patterns within putative structural proteins*. Front Microbiol, 2015. **6**: p. 696.
259. Rosario, K., et al., *Vector-Enabled Metagenomic (VEM) Surveys Using Whiteflies (Aleyrodidae) Reveal Novel Begomovirus Species in the New and Old Worlds*. Viruses, 2015. **7**(10): p. 5553-70.
260. Roux, S., et al., *Assessing the diversity and specificity of two freshwater viral communities through metagenomics*. PLoS One, 2012. **7**(3): p. e33641.
261. Roux, S., et al., *Ecology and evolution of viruses infecting uncultivated SUP05 bacteria as revealed by single-cell- and meta-genomics*. Elife, 2014. **3**: p. e03125.
262. Roux, S., et al., *Ecogenomics of virophages and their giant virus hosts assessed through time series metagenomics*. Nat Commun, 2017. **8**(1): p. 858.
263. Ruiz-Padilla, A., et al., *Novel Mycoviruses Discovered in the Mycovirome of a Necrotrophic Fungus*. mBio, 2021. **12**(3).
264. S, I.S., et al., *High-Quality Resolution of the Outbreak-Related Zika Virus Genome and Discovery of New Viruses Using Ion Torrent-Based Metatranscriptomics*. Viruses, 2020. **12**(7).
265. Li, S.K., et al., *Detection and identification of plasma bacterial and viral elements in HIV/AIDS patients in comparison to healthy adults*. Clin Microbiol Infect, 2012. **18**(11): p. 1126-33.
266. Yang, S., et al., *A novel rodent Chapparravirus in feces of wild rats*. Virol J, 2016. **13**: p. 133.
267. Yang, S., et al., *Bufavirus Protoparvovirus in feces of wild rats in China*. Virus Genes, 2016. **52**(1): p. 130-3.
268. Yang, S., et al., *A novel bocavirus from domestic mink, China*. Virus Genes, 2016. **52**(6): p. 887-890.
269. Saad, N., et al., *Discovery of Known and Novel Viruses in Wild and Cultivated Blueberry in Florida through Viral Metagenomic Approaches*. Viruses, 2021. **13**(6).
270. Sadeghi, M., et al., *Virome of > 12 thousand Culex mosquitoes from throughout California*. Virology, 2018. **523**: p. 74-88.
271. Sadeghi, M., et al., *Virome of US bovine calf serum*. Biologicals, 2017. **46**: p. 64-67.
272. Sadeghi, M., et al., *Genomes of viral isolates derived from different mosquitos species*. Virus Res, 2017. **242**: p. 49-57.
273. Sanborn, M.A., et al., *Metagenomic Analysis Reveals Three Novel and Prevalent Mosquito Viruses from a Single Pool of Aedes vexans nipponii Collected in the Republic of Korea*. Viruses, 2019. **11**(3).
274. Sano, K., et al., *Identification of further diversity among posaviruses*. Arch Virol, 2016. **161**(12): p. 3541-3548.
275. Santos, P.D., et al., *In action-an early warning system for the detection of unexpected or novel pathogens*. Virus Evol, 2021. **7**(2): p. veab085.

276. Sasaki, M., et al., *Metagenomic analysis of the shrew enteric virome reveals novel viruses related to human stool-associated viruses*. J Gen Virol, 2015. **96**(Pt 2): p. 440-452.
277. Scheets, K., *Infectious transcripts of an asymptomatic panico virus identified from a metagenomic survey*. Virus Res, 2013. **176**(1-2): p. 161-8.
278. Schlottau, K., et al., *Detection of a Novel Bovine Astrovirus in a Cow with Encephalitis*. Transbound Emerg Dis, 2016. **63**(3): p. 253-9.
279. Schoonvaere, K., et al., *Unbiased RNA Shotgun Metagenomics in Social and Solitary Wild Bees Detects Associations with Eukaryote Parasites and New Viruses*. PLoS One, 2016. **11**(12): p. e0168456.
280. Schulz, F., et al., *Hidden diversity of soil giant viruses*. Nat Commun, 2018. **9**(1): p. 4881.
281. Schürch, A.C., et al., *Metagenomic survey for viruses in Western Arctic caribou, Alaska, through iterative assembly of taxonomic units*. PLoS One, 2014. **9**(8): p. e105227.
282. Shahhosseini, N., et al., *Detection and characterization of a novel rhabdovirus in Aedes cantans mosquitoes and evidence for a mosquito-associated new genus in the family Rhabdoviridae*. Infect Genet Evol, 2017. **55**: p. 260-268.
283. Shan, T., et al., *The fecal virome of pigs on a high-density farm*. J Virol, 2011. **85**(22): p. 11697-708.
284. Shang, P., et al., *A Naturally Occurring Recombinant Enterovirus Expresses a Torovirus Deubiquitinase*. J Virol, 2017. **91**(14).
285. Shi, C., et al., *Stable distinct core eukaryotic viromes in different mosquito species from Guadeloupe, using single mosquito viral metagenomics*. Microbiome, 2019. **7**(1): p. 121.
286. Šimić, I., et al., *Novel Circo-Like Virus Detected in a Croatian Bat Population*. Microbiol Resour Announc, 2019. **8**(16).
287. Šimić, I., et al., *Viral Metagenomic Profiling of Croatian Bat Population Reveals Sample and Habitat Dependent Diversity*. Viruses, 2020. **12**(8).
288. Simsek, C., et al., *At Least Seven Distinct Rotavirus Genotype Constellations in Bats with Evidence of Reassortment and Zoonotic Transmissions*. mBio, 2021. **12**(1).
289. Siqueira, J.D., et al., *ENDEMIC INFECTION OF STRANDED SOUTHERN SEA OTTERS (ENHYDRA LUTRIS NEREIS) WITH NOVEL PARVOVIRUS, POLYOMAVIRUS, AND ADENOVIRUS*. J Wildl Dis, 2017. **53**(3): p. 532-542.
290. Smits, S.L., et al., *New viruses in idiopathic human diarrhea cases, the Netherlands*. Emerg Infect Dis, 2014. **20**(7): p. 1218-22.
291. Smits, S.L., et al., *Metagenomic analysis of the ferret fecal viral flora*. PLoS One, 2013. **8**(8): p. e71595.
292. Smits, S.L., et al., *Novel cyclovirus in human cerebrospinal fluid, Malawi, 2010-2011*. Emerg Infect Dis, 2013. **19**(9): p. 1511-3.
293. Song, X., et al., *An emerging orthopneumovirus detected from dogs with canine infectious respiratory disease in China*. Transbound Emerg Dis, 2021. **68**(6): p. 3217-3221.
294. Souza, W.M., et al., *Viral diversity of Rhipicephalus microplus parasitizing cattle in southern Brazil*. Sci Rep, 2018. **8**(1): p. 16315.
295. Sun, M., et al., *Uncultivated Viral Populations Dominate Estuarine Viromes on the Spatiotemporal Scale*. mSystems, 2021. **6**(2).
296. Susi, H., et al., *Genome sequences of a capulavirus infecting Plantago lanceolata in the Åland archipelago of Finland*. Arch Virol, 2017. **162**(7): p. 2041-2045.
297. Susi, H., et al., *Diverse and variable virus communities in wild plant populations revealed by metagenomic tools*. PeerJ, 2019. **7**: p. e6140.
298. Suzuki, Y., et al., *Long-read metagenomic exploration of extrachromosomal mobile genetic elements in the human gut*. Microbiome, 2019. **7**(1): p. 119.
299. Ng, T.F.F., et al., *Metagenomic identification of a novel anellovirus in Pacific harbor seal (Phoca vitulina richardsii) lung samples and its detection in samples from multiple years*. J Gen Virol, 2011. **92**(Pt 6): p. 1318-1323.
300. Ng, T.F.F., et al., *Two new species of betatorqueviruses identified in a human melanoma that metastasized to the brain*. Oncotarget, 2017. **8**(62): p. 105800-105808.
301. Ng, T.F., et al., *Discovery of a novel single-stranded DNA virus from a sea turtle fibropapilloma by using viral metagenomics*. J Virol, 2009. **83**(6): p. 2500-9.
302. Ng, T.F., et al., *High variety of known and new RNA and DNA viruses of diverse origins in untreated sewage*. J Virol, 2012. **86**(22): p. 12161-75.
303. Ng, T.F., et al., *Feline fecal virome reveals novel and prevalent enteric viruses*. Vet Microbiol, 2014. **171**(1-2): p. 102-11.
304. Ng, T.F., et al., *Oral papillomatosis caused by Enhydra lutris papillomavirus 1 (ELPV-1) in southern sea otters (Enhydra lutris nereis) in California, USA*. J Wildl Dis, 2015. **51**(2): p. 446-53.

305. Ng, T.F., et al., *Metagenomic identification of a nodavirus and a circular ssDNA virus in semi-purified viral nucleic acids from the hepatopancreas of healthy Farfantepenaeus duorarum shrimp*. Dis Aquat Organ, 2013. **105**(3): p. 237-42.
306. Ng, T.F., et al., *Broad surveys of DNA viral diversity obtained through viral metagenomics of mosquitoes*. PLoS One, 2011. **6**(6): p. e20579.
307. Ng, T.F., et al., *Identification of an astrovirus commonly infecting laboratory mice in the US and Japan*. PLoS One, 2013. **8**(6): p. e66937.
308. Ng, T.F., et al., *Exploring the diversity of plant DNA viruses and their satellites using vector-enabled metagenomics on whiteflies*. PLoS One, 2011. **6**(4): p. e19050.
309. Li, T., et al., *Metagenomic Next-Generation Sequencing of the 2014 Ebola Virus Disease Outbreak in the Democratic Republic of the Congo*. J Clin Microbiol, 2019. **57**(9).
310. Zhao, T., et al., *Comparison of Viromes in Ticks from Different Domestic Animals in China*. Virol Sin, 2020. **35**(4): p. 398-406.
311. Tahmasebi, R., et al., *Genomic Analyses of Potential Novel Recombinant Human Adenovirus C in Brazil*. Viruses, 2020. **12**(5).
312. Tamaki, H., et al., *Metagenomic analysis of DNA viruses in a wastewater treatment plant in tropical climate*. Environ Microbiol, 2012. **14**(2): p. 441-52.
313. Tangudu, C.S., et al., *Skunk River virus, a novel orbivirus isolated from Aedes trivittatus in the United States*. J Gen Virol, 2019. **100**(2): p. 295-300.
314. Temmam, S., et al., *Characterization of Viral Communities of Biting Midges and Identification of Novel Thogotovirus Species and Rhabdovirus Genus*. Viruses, 2016. **8**(3): p. 77.
315. Thannesberger, J., et al., *Viral metagenomics reveals the presence of novel Zika virus variants in Aedes mosquitoes from Barbados*. Parasit Vectors, 2021. **14**(1): p. 343.
316. Theuns, S., et al., *Characterization of a genetically heterogeneous porcine rotavirus C, and other viruses present in the fecal virome of a non-diarrheic Belgian piglet*. Infect Genet Evol, 2016. **43**: p. 135-45.
317. Thi Kha Tu, N., et al., *The Virome of Acute Respiratory Diseases in Individuals at Risk of Zoonotic Infections*. Viruses, 2020. **12**(9).
318. Tisza, M.J., et al., *Discovery of several thousand highly diverse circular DNA viruses*. Elife, 2020. **9**.
319. Truchado, D.A., et al., *A Novel and Divergent Gyrovirus with Unusual Genomic Features Detected in Wild Passerine Birds from a Remote Rainforest in French Guiana*. Viruses, 2019. **11**(12).
320. Truchado, D.A., et al., *Comparative Metagenomics of Palearctic and Neotropical Avian Cloacal Viromes Reveal Geographic Bias in Virus Discovery*. Microorganisms, 2020. **8**(12).
321. Tse, H., et al., *Identification of a novel bat papillomavirus by metagenomics*. PLoS One, 2012. **7**(8): p. e43986.
322. Tsuchiaka, S., et al., *Identification of a novel bovine enterovirus possessing highly divergent amino acid sequences in capsid protein*. BMC Microbiol, 2017. **17**(1): p. 18.
323. Tsuchiaka, S., et al., *Genetic diversity and recombination of enterovirus G strains in Japanese pigs: High prevalence of strains carrying a papain-like cysteine protease sequence in the enterovirus G population*. PLoS One, 2018. **13**(1): p. e0190819.
324. Ullah, K., et al., *Detection and molecular characterization of picobirnaviruses in the wild birds: Identification of a novel picobirnavirus possessing yeast mitochondrial genetic code*. Virus Res, 2021: p. 198624.
325. Urayama, S.I., et al., *Unveiling the RNA virosphere associated with marine microorganisms*. Mol Ecol Resour, 2018. **18**(6): p. 1444-1455.
326. Valles, S.M. and Y. Hashimoto, *Isolation and characterization of Solenopsis invicta virus 3, a new positive-strand RNA virus infecting the red imported fire ant, Solenopsis invicta*. Virology, 2009. **388**(2): p. 354-61.
327. Valles, S.M. and A.R. Rivers, *Nine new RNA viruses associated with the fire ant Solenopsis invicta from its native range*. Virus Genes, 2019. **55**(3): p. 368-380.
328. Valles, S.M., et al., *Metatranscriptomics and pyrosequencing facilitate discovery of potential viral natural enemies of the invasive Caribbean crazy ant, Nylanderia pubens*. PLoS One, 2012. **7**(2): p. e31828.
329. Valles, S.M., S.D. Porter, and L.A. Calcatera, *Prospecting for viral natural enemies of the fire ant Solenopsis invicta in Argentina*. PLoS One, 2018. **13**(2): p. e0192377.

330. van Beurden, S.J., et al., *A novel cetacean adenovirus in stranded harbour porpoises from the North Sea: detection and molecular characterization*. Arch Virol, 2017. **162**(7): p. 2035-2040.
331. Vandegrift, K.J., et al., *Presence of Segmented Flavivirus Infections in North America*. Emerg Infect Dis, 2020. **26**(8): p. 1810-1817.
332. Vanmechelen, B., et al., *Exploration of the Ixodes ricinus virosphere unveils an extensive virus diversity including novel coltiviruses and other reoviruses*. Virus Evol, 2021. **7**(2): p. veab066.
333. Vibin, J., et al., *Metagenomic characterisation of additional and novel avian viruses from Australian wild ducks*. Sci Rep, 2020. **10**(1): p. 22284.
334. Vibin, J., et al., *Metagenomic characterisation of avian parvoviruses and picornaviruses from Australian wild ducks*. Sci Rep, 2020. **10**(1): p. 12800.
335. Victoria, J.G., et al., *Rapid identification of known and new RNA viruses from animal tissues*. PLoS Pathog, 2008. **4**(9): p. e1000163.
336. Villamor, J., et al., *Characterization of ecologically diverse viruses infecting co-occurring strains of cosmopolitan hyperhalophilic Bacteroidetes*. Isme j, 2018. **12**(2): p. 424-437.
337. Villanova, F., et al., *New Variants of Squash Mosaic Viruses Detected in Human Fecal Samples*. Microorganisms, 2021. **9**(7).
338. Voorhies, A.A., et al., *Ecological and genetic interactions between cyanobacteria and viruses in a low-oxygen mat community inferred through metagenomics and metatranscriptomics*. Environ Microbiol, 2016. **18**(2): p. 358-71.
339. Zhang, W., et al., *Identification and genomic characterization of a novel species of feline anellovirus*. Virol J, 2016. **13**(1): p. 146.
340. Zhang, W., et al., *Virome comparisons in wild-diseased and healthy captive giant pandas*. Microbiome, 2017. **5**(1): p. 90.
341. Zhang, W., et al., *Characterization and genomic analysis of the first Oceanospirillum phage, vB\_OliS\_GJ44, representing a novel siphoviral cluster*. BMC Genomics, 2021. **22**(1): p. 675.
342. Zhang, W., et al., *What is for dinner? Viral metagenomics of US store bought beef, pork, and chicken*. Virology, 2014. **468-470**: p. 303-310.
343. Zhang, W., et al., *Faecal virome of cats in an animal shelter*. J Gen Virol, 2014. **95**(Pt 11): p. 2553-2564.
344. Wamonde, F.O., et al., *Viral metagenomics of aphids present in bean and maize plots on mixed-use farms in Kenya reveals the presence of three dicistroviruses including a novel Big Sioux River virus-like dicistrovirus*. Virol J, 2017. **14**(1): p. 188.
345. Weber, M.N., et al., *Characterization of dog serum virome from Northeastern Brazil*. Virology, 2018. **525**: p. 192-199.
346. Webster, C.L., et al., *Twenty-Five New Viruses Associated with the Drosophilidae (Diptera)*. Evol Bioinform Online, 2016. **12**(Suppl 2): p. 13-25.
347. Williams, S.H., et al., *The Diversity and Distribution of Viruses Associated with Culex annulirostris Mosquitoes from the Kimberley Region of Western Australia*. Viruses, 2020. **12**(7).
348. Wu, S., et al., *Diverse and unique viruses discovered in the surface water of the East China Sea*. BMC Genomics, 2020. **21**(1): p. 441.
349. Wüthrich, D., et al., *Exploring the virome of cattle with non-suppurative encephalitis of unknown etiology by metagenomics*. Virology, 2016. **493**: p. 22-30.
350. Wang, X.C., et al., *Viral metagenomics reveals diverse anelloviruses in bone marrow specimens from hematologic patients*. J Clin Virol, 2020. **132**: p. 104643.
351. Chen, X., et al., *A novel astrovirus species in the gut of yaks with diarrhoea in the Qinghai-Tibetan Plateau, 2013*. J Gen Virol, 2015. **96**(12): p. 3672-3680.
352. Liu, X., et al., *Genomic and transcriptional analyses of novel parvoviruses identified from dead peafowl*. Virology, 2020. **539**: p. 80-91.
353. Chen, X.U., et al., *Identification and Characterization of a Novel Recombinant Porcine Astrovirus from Pigs in Anhui, China*. Pol J Microbiol, 2020. **69**(4): p. 471-478.
354. Wang, X., et al., *An enterovirus from a captive primate in China*. Springerplus, 2016. **5**(1): p. 1281.
355. Xia, H., et al., *Comparative Metagenomic Profiling of Viromes Associated with Four Common Mosquito Species in China*. Virol Sin, 2018. **33**(1): p. 59-66.
356. Kim, Y., et al., *Metagenomic Investigation of Viral Communities in Ballast Water*. Environ Sci Technol, 2015. **49**(14): p. 8396-407.
357. Li, Y., et al., *Virome of Bat Guano from Nine Northern California Roosts*. J Virol, 2021. **95**(3).
358. Li, Y., et al., *Astrovirus Outbreak in an Animal Shelter Associated With Feline Vomiting*. Front Vet Sci, 2021. **8**: p. 628082.
359. Li, Y., et al., *Virome of a Feline Outbreak of Diarrhea and Vomiting Includes Bocaviruses and a Novel Chapparravirus*. Viruses, 2020. **12**(5).
360. Li, Y., et al., *Identification and genome characterization of a novel picornavirus from ducks in China*. Arch Virol, 2020. **165**(9): p. 2087-2089.

361. Wang, Y., et al., *A novel cardiovirus in wild rats*. Virol J, 2018. **15**(1): p. 58.
362. Wang, Y., et al., *The fecal virome of red-crowned cranes*. Arch Virol, 2019. **164**(1): p. 3-16.
363. Xu, Y., et al., *A novel Enterovirus 96 circulating in China causes hand, foot, and mouth disease*. Virus Genes, 2017. **53**(3): p. 352-356.
364. Zhang, Y., et al., *A novel species of torque teno mini virus (TTMV) in gingival tissue from chronic periodontitis patients*. Sci Rep, 2016. **6**: p. 26739.
365. Zhang, Y., et al., *Detection of a new species of torque teno mini virus from the gingival epithelium of patients with periodontitis*. Virus Genes, 2017. **53**(6): p. 823-830.
366. Zhang, Y., et al., *A novel phage from periodontal pockets associated with chronic periodontitis*. Virus Genes, 2019. **55**(3): p. 381-393.
367. Yinda, C.K., et al., *Novel highly divergent reassortant bat rotaviruses in Cameroon, without evidence of zoonosis*. Sci Rep, 2016. **6**: p. 34209.
368. Yinda, C.K., et al., *Cameroonian fruit bats harbor divergent viruses, including rotavirus H, bastroviruses, and picobirnaviruses using an alternative genetic code*. Virus Evol, 2018. **4**(1): p. vey008.
369. Yinda, C.K., et al., *Novel highly divergent sapoviruses detected by metagenomics analysis in straw-colored fruit bats in Cameroon*. Emerg Microbes Infect, 2017. **6**(5): p. e38.
370. Yinda, C.K., et al., *Highly diverse population of Picornaviridae and other members of the Picornavirales, in Cameroonian fruit bats*. BMC Genomics, 2017. **18**(1): p. 249.
371. Yutin, N., V.V. Kapitonov, and E.V. Koonin, *A new family of hybrid virophages from an animal gut metagenome*. Biol Direct, 2015. **10**: p. 19.
372. Yang, Z., et al., *Virome analysis of ticks in a forest region of Liaoning, China: characterization of a novel hepe-like virus sequence*. Virol J, 2021. **18**(1): p. 163.
373. Zakham, F., et al., *Viral RNA Metagenomics of Hyalomma Ticks Collected from Dromedary Camels in Makkah Province, Saudi Arabia*. Viruses, 2021. **13**(7).
374. Zaragoza-Solas, A., F. Rodriguez-Valera, and M. López-Pérez, *Metagenome Mining Reveals Hidden Genomic Diversity of Pelagimyophages in Aquatic Environments*. mSystems, 2020. **5**(1).
375. Zhan, Y., et al., *A novel roseobacter phage possesses features of podoviruses, siphoviruses, prophages and gene transfer agents*. Sci Rep, 2016. **6**: p. 30372.
376. Zhou, H., et al., *Identification and Genome Characterization of the First Sicinivirus Isolate from Chickens in Mainland China by Using Viral Metagenomics*. PLoS One, 2015. **10**(10): p. e0139668.
377. Zhu, Q., et al., *Visualization-assisted binning of metagenome assemblies reveals potential new pathogenic profiles in idiopathic travelers' diarrhea*. Microbiome, 2018. **6**(1): p. 201.
378. Zsak, L., et al., *The complete genome sequence and genetic analysis of ΦCA82 a novel uncultured microphage from the turkey gastrointestinal system*. Virol J, 2011. **8**: p. 331.
379. Zschach, H., et al., *What Can We Learn from a Metagenomic Analysis of a Georgian Bacteriophage Cocktail?* Viruses, 2015. **7**(12): p. 6570-89.
