# Supplementary material for: Novel Virus Identification through Metagenomics: A Systematic Review
Source: MDPI journal article supplement (doi:10.3390/life12122048), 2022-12-07
Supplement: s1 [file s1]

**Table S1: list of commercial kits employed**

| Extraction kit                      | Manufacturer    | Genome  | Extraction method     | Specimen                                                                                             | n | References             |
|-------------------------------------|-----------------|---------|-----------------------|------------------------------------------------------------------------------------------------------|---|------------------------|
| Agencourt Formapure Kit             | Beckman Coulter | DNA/RNA | Magnetic beads-based  | brain tissue                                                                                         | 1 | [169]                  |
| Ampliprep DNA extraction machine    | Roche           | DNA     | Magnetic beads-based  | stool samples                                                                                        | 1 | [147]                  |
| AMPure beads                        | PacBio          | DNA     | Magnetic beads-based  | faecal samples                                                                                       | 1 | [298]                  |
| beads, thermo fisher                | ThermoFisher    | RNA     | Magnetic beads-based  | potato leaf                                                                                          | 1 | [36]                   |
| Cador Qiagen Pathogen minikit       | Qiagen          | DNA/RNA | Column-based          | mucus samples                                                                                        | 1 | [92]                   |
| ChargeSwitch gDNA Mini Bacteria Kit | ThermoFisher    | DNA     | Magnetic beads-based  | water                                                                                                | 1 | [31]                   |
| Chemagic MSM I                      | Perkin Elmer    | DNA/RNA | Magnetic beads-based  | fecal samples                                                                                        | 1 | [377]                  |
| Direct-zol RNA Miniprep kit         | Zymo Research   | RNA     | Column-based          | fecal sample                                                                                         | 1 | [104]                  |
| DNA/RNA Viral Extraction Kit        | Invitrogen      | DNA/RNA | Silica membrane-based | hot spring samples                                                                                   | 1 | [40]                   |
| DNeasy Blood & Tissue Kit           | Qiagen          | DNA     | Column-based          | fish, tumor tissue, venous blood, spleen, thymus, and lung, wastewater, Hepatopancreas tissue, water | 6 | [19,51,84,133,305,348] |
| DNeasy Plant DNA extraction kit     | Qiagen          | DNA     | Silica membrane-based | Leaf                                                                                                 | 1 | [65]                   |
| DNeasy Plant Mini Kit               | Qiagen          | DNA     | Column-based          | plants, mummified peach fruits                                                                       | 2 | [121,155]              |

|                                               |                   |         |                       |                                                                                                                                                                                                                                          |    |                                           |
|-----------------------------------------------|-------------------|---------|-----------------------|------------------------------------------------------------------------------------------------------------------------------------------------------------------------------------------------------------------------------------------|----|-------------------------------------------|
| E.Z.N.A. Plant Kit                            | Omega Biotek      | DNA     | Magnetic beads-based  | leaf                                                                                                                                                                                                                                     | 1  | [297]                                     |
| Extract-N-Amp                                 | Sigma–Aldrich     | DNA     | Solvent-based         | larvae                                                                                                                                                                                                                                   | 1  | [79]                                      |
| EZ1 Advanced XL device                        | Qiagen            | DNA/RNA | Magnetic beads-based  | sewage sample                                                                                                                                                                                                                            | 1  | [15]                                      |
| FastDNA Kit                                   | MP Biomedicals    | DNA     | Silica membrane-based | freshwater                                                                                                                                                                                                                               | 1  | [262]                                     |
| GeneJet Viral DNA and RNA Purification Kit    | ThermoFisher      | DNA/RNA | Silica membrane-based | bat guano, fecal sample                                                                                                                                                                                                                  | 2  | [25,160]                                  |
| Genjet RNA extraction kit                     | ThermoFisher      | RNA     | Column-based          | ticks homogenization                                                                                                                                                                                                                     | 1  | [35]                                      |
| Genomic-tip 20/G purification kit             | Qiagen            | DNA     | Column-based          | seawater                                                                                                                                                                                                                                 | 1  | [27]                                      |
| High Pure template preparation kit            | Roche             | DNA     | Filter tube           | intestinal contents                                                                                                                                                                                                                      | 1  | [91]                                      |
| High Pure Viral Nucleic Acid kit              | Roche             | DNA/RNA | Filter tube           | swab samples, sewage and reclaimed water samples, buccal swab, cassava leaf, brains and hemolymph, blackflies homogenization, faeces, mosquito homogenization, Fecal Samples, blood, lung, liver, spleen, kidney and intestinal contents | 11 | [37,56,70,78,165,166,183,213,214,232,276] |
| High pure viral nucleic acid large volume kit | Roche             | RNA     | Column-based          | insect                                                                                                                                                                                                                                   | 1  | [205]                                     |
| High Pure Viral RNA Kit                       | Roche             | RNA     | Filter tube           | Salivary gland, raw sewage                                                                                                                                                                                                               | 3  | [73,127,188]                              |
| iPrep PureLink Virus Kit                      | Life Technologies | DNA/RNA | Other/multiple type   | bat guano                                                                                                                                                                                                                                | 1  | [135]                                     |

|                                                         |              |         |                                |                                                                                                                                                                                                                                                                                    |    |                                                                       |
|---------------------------------------------------------|--------------|---------|--------------------------------|------------------------------------------------------------------------------------------------------------------------------------------------------------------------------------------------------------------------------------------------------------------------------------|----|-----------------------------------------------------------------------|
| iPrep virus kit                                         | Invitrogen   | DNA/RNA | Other/multiple type            | guano, feces and saliva                                                                                                                                                                                                                                                            | 2  | [286,287]                                                             |
| ISGEN LS                                                | NipponGene   | RNA     | Solvent-based                  | fecal samples                                                                                                                                                                                                                                                                      | 1  | [189]                                                                 |
| Isogen II                                               | NipponGene   | RNA     | Solvent-based                  | mosquitoes                                                                                                                                                                                                                                                                         | 1  | [102]                                                                 |
| Mag-Bind Viral DNA/RNA kit                              | Omega Biotek | DNA/RNA | Magnetic beads-based           | mosquitoes                                                                                                                                                                                                                                                                         | 1  | [103]                                                                 |
| MagMAX Express-96 Deep Well Magnetic Particle Processor | ThermoFisher | DNA/RNA | Magnetic beads-based           | mosquitoes homogenization                                                                                                                                                                                                                                                          | 2  | [270,347]                                                             |
| MagMAX Viral Isolation Kit                              | ThermoFisher | DNA/RNA | Magnetic beads-based           | bee homogenization                                                                                                                                                                                                                                                                 | 1  | [120]                                                                 |
| MagMAX Viral RNA Isolation kit                          | ThermoFisher | RNA     | Magnetic beads-based           | Spleen, liver, lung, kidney, and small intestine, tissue pools, mesenteric lymph node, lung swab, Gut tissue, nasal swabs, cerebrospinal fluid, Feces, plasma, cloacal swabs, fecal sample, nasopharyngeal aspirates, serum pools, mosquito pool, oral sample, neat piece of meats | 23 | [7-13,97,100,101,107,140,229,247,271,272,282,319,320,342,343,358,219] |
| MagMAX-96 Viral RNA Isolation Kit                       | Ambion       | RNA     | Magnetic beads-based           | heart and lung tissues homogenate                                                                                                                                                                                                                                                  | 1  | [228]                                                                 |
| MagNA Pure 96 system                                    | Roche        | DNA/RNA | Magnetic glass particles-based | fecal sample                                                                                                                                                                                                                                                                       | 1  | [176]                                                                 |
| MagNA Pure Large Volume kit                             | Roche        | DNA/RNA | Magnetic glass particles-based | Ticks homogenization                                                                                                                                                                                                                                                               | 1  | [222]                                                                 |
| MagNA Pure LC - DNA Kit                                 | Roche        | DNA     | Magnetic glass particles-based | maize samples                                                                                                                                                                                                                                                                      | 1  | [344]                                                                 |
| MagNA Pure LC - Total Nucleic Acid Kit                  | Roche        | DNA/RNA | Magnetic glass particles-based | swab samples, Serum and CSF                                                                                                                                                                                                                                                        | 2  | [17,292]                                                              |

|                                                      |                        |         |                       |                                           |   |               |
|------------------------------------------------------|------------------------|---------|-----------------------|-------------------------------------------|---|---------------|
| MasterPure Complete DNA and RNA Purification kit     | Biosearch Technologies | DNA/RNA | Solvent-based         | mosquitos, seawater                       | 2 | [58,193]      |
| Maxwell 16 automated extractor                       | Promega                | DNA/RNA | Magnetic beads-based  | serum, diarrhea samples, fecal samples    | 3 | [225-227]     |
| Maxwell 16 viral total nucleic acid purification kit | Promega                | DNA/RNA | Magnetic beads-based  | blood                                     | 1 | [157]         |
| MiniBEST Universal Genomic DNA Extraction Kit        | TaKaRa                 | DNA     | Column-based          | fecal samples, intestinal content samples | 3 | [266-268]     |
| MiniBEST Viral RNA/DNA Extraction Kit                | TaKaRa                 | DNA/RNA | Column-based          | fecal samples                             | 1 | [354]         |
| mirVana miRNA isolation kit                          | ThermoFisher           | RNA     | Column-based          | hot spring                                | 1 | [39]          |
| NEBNext Ultra RNA Library Prep Kit for Illumina      | NEB                    | RNA     | Magnetic beads-based  | fecal samples                             | 1 | [210]         |
| Nucleon Bacc2 kit                                    | GE Healthcare          | DNA     | Solvent-based         | brain tissue                              | 1 | [44]          |
| NucleoSpin 96 Virus Core Kit                         | Macherey-Nagel         | DNA/RNA | Silica membrane-based | leaf samples, mites homogenization        | 3 | [110,115,216] |
| Nucleospin Extract II kit                            | Macherey-Nagel         | DNA     | Silica membrane-based | peatsoilandwater                          | 1 | [238]         |
| NucleoSpin kit                                       | Macherey-Nagel         | DNA/RNA | Silica membrane-based | Wild Poaceae                              | 1 | [77]          |
| Nucleospin RNA II kit                                | Macherey-Nagel         | RNA     | Silica membrane-based | ticks                                     | 1 | [199]         |

|                                           |                |         |                       |                                                        |   |                   |
|-------------------------------------------|----------------|---------|-----------------------|--------------------------------------------------------|---|-------------------|
| NucleoSpin RNA Stool kit                  | Macherey–Nagel | RNA     | Silica membrane-based | fecal sample                                           | 1 | [1]               |
| Nucleospin RNA XS Kit                     | Macherey–Nagel | RNA     | Silica membrane-based | Intestinal contents                                    | 1 | [330]             |
| NucleoSpin RNA Midi kits                  | Macherey–Nagel | RNA     | Silica membrane-based | water                                                  | 1 | [50]              |
| NucliSens easyMAG system                  | bioMérieux     | DNA/RNA | Other/multiple type   | nasopharyngeal aspirate samples                        | 1 | [173]             |
| NZYol                                     | NZYTech        | RNA     | Solvent-based         | liver, skin, gills                                     | 1 | [108]             |
| Phage DNA isolation kit                   | Norgen Biotek  | DNA     | Column-based          | Intesti bacteriophage                                  | 1 | [379]             |
| PowerSoil DNA Isolation kit               | Mo Bio         | DNA     | Silica membrane-based | Intesti bacteriophage, wastewater, seafloor, air, soil | 4 | [128,215,242,280] |
| PowerSoil Max kit                         | MO BIO         | DNA     | Silica membrane-based | compost sample, soil and water                         | 2 | [14,198]          |
| PowerSoil RNA Isolation kit               | MO BIO         | RNA     | Column-based          | water                                                  | 1 | [348]             |
| PureLink Microbiome DNA purification kit  | Invitrogen     | DNA     | Column-based          | Plant Metagenome                                       | 1 | [105]             |
| PureLink Viral DNA and RNA extraction kit | Invitrogen     | DNA/RNA | Column-based          | hot spring water sample                                | 1 | [146]             |
| QIAamp 96 Virus QIAcube HT kit            | Qiagen         | DNA/RNA | Silica membrane-based | Mosquito homogenization, nasal-throat swabs            | 2 | [273,317]         |
| QIAamp Circulating Nucleic Acid Kit       | Qiagen         | DNA/RNA | Silica membrane-based | blood samples                                          | 1 | [164]             |
| QIAamp DNA blood mini kit                 | Qiagen         | DNA     | Silica membrane-based | plasma                                                 | 1 | [265]             |

|                                 |        |         |                       |                                                                                                                                                                                                                                                                                                                                                                               |    |                                                                                |
|---------------------------------|--------|---------|-----------------------|-------------------------------------------------------------------------------------------------------------------------------------------------------------------------------------------------------------------------------------------------------------------------------------------------------------------------------------------------------------------------------|----|--------------------------------------------------------------------------------|
| QIAamp DNA FFPE Tissue Kit      | Qiagen | DNA     | Column-based          | Plant Metagenome                                                                                                                                                                                                                                                                                                                                                              | 1  | [105]                                                                          |
| QIAamp DNA Mini and Blood kit   | Qiagen | DNA     | Silica membrane-based | nasopharyngeal aspirate samples                                                                                                                                                                                                                                                                                                                                               | 1  | [173]                                                                          |
| QIAamp DNA Mini Kit             | Qiagen | DNA     | Silica membrane-based | brain tissue, serum, lymph nodes, nasopharyngeal swabs, plasma, water                                                                                                                                                                                                                                                                                                         | 7  | [32-34,53,57,72,260]                                                           |
| QIAamp DNA Stool kit            | Qiagen | DNA     | Silica membrane-based | fecal sample, feces                                                                                                                                                                                                                                                                                                                                                           | 3  | [137,192,201]                                                                  |
| QIAamp Fast DNA Stool Mini Kit  | Qiagen | DNA     | Silica membrane-based | surface water                                                                                                                                                                                                                                                                                                                                                                 | 1  | [124]                                                                          |
| QIAamp MinElute Virus Spin Kit  | Qiagen | DNA/RNA | Column-based          | wastewater, feces, blood, fecal samples, copepods, oral secretion, nasal secretion, genital secretion, skin swab, water, heart, liver, spleen, lung, and kidney, insects homogenization, mussels, dragonfly abdomens, dragonflies, variety of marine invertebrate species, adult whiteflies, Conjunctival swabs, oral swabs, fibropapilloma swabs, bone marrow, ballast water | 22 | [20,55,75,76,93,132,150,177,181,250, 256-259,299,301,307,308,350,356,359,376 ] |
| QIAamp MinEluteVirus Vacuum Kit | Qiagen | DNA/RNA | Other/multiple type   | feces                                                                                                                                                                                                                                                                                                                                                                         | 1  | [60]                                                                           |
| QIAamp spin-column              | Qiagen | DNA/RNA | Column-based          | fecal samples, cloacal and tissue samples, sewage waters                                                                                                                                                                                                                                                                                                                      | 4  | [138,219,246,302]                                                              |
| QIAamp UCP Micro Kit            | Qiagen | DNA/RNA | Column-based          | insect                                                                                                                                                                                                                                                                                                                                                                        | 1  | [315]                                                                          |
| QIAamp viral DNA kit            | Qiagen | DNA     | Column-based          | samples of shrimp                                                                                                                                                                                                                                                                                                                                                             | 1  | [237]                                                                          |

|                                 |        |         |                       |                                                                                                                                                                                                                                                                                                                                                                                                                                                                                                                                                                                                    |    |                                                                                                                                                                                                     |
|---------------------------------|--------|---------|-----------------------|----------------------------------------------------------------------------------------------------------------------------------------------------------------------------------------------------------------------------------------------------------------------------------------------------------------------------------------------------------------------------------------------------------------------------------------------------------------------------------------------------------------------------------------------------------------------------------------------------|----|-----------------------------------------------------------------------------------------------------------------------------------------------------------------------------------------------------|
| QIAamp viral RNA kit            | Qiagen | RNA     | Silica membrane-based | serum, nasal and throat swabs, stools, cerebrospinal fluid, water, faecal sample, several tissues, feces, whole-blood, mosquitoes homogenization, infected gingival epithelium samples, periodontal pockets, gingival epithelium, and connective tissue facing the sulcus                                                                                                                                                                                                                                                                                                                          | 9  | [16,122,217,231,283,309,355,364,366]                                                                                                                                                                |
| QIAamp Viral RNA Mini Elute Kit | Qiagen | RNA     | Column-based          | liver, heart, intestine and stomach                                                                                                                                                                                                                                                                                                                                                                                                                                                                                                                                                                | 1  | [352]                                                                                                                                                                                               |
| QIAamp viral RNA mini kit       | Qiagen | RNA     | Other/multiple type   | faeces, mosquitoes homogenization, mosquitoes and midges, diarrheic stools, swab and cloacal samples, stool samples, parsley leaves, mosquitoes, oral, throat and anal swab samples, serum samples, fecal samples, blood, bat guano, plasma, nasal swab, mixed biological samples, plasma, vaginal swab, insect, C6/36 cells (Aedes albopictus), cell culture, Mosquito homogenization, tissue pools from liver and lymph nodes, Tick homogenization, bovine serum, brain tumor samples, feline feces, Rectal swabs, nasopharyngeal secretion, heart, liver, spleen, lung, and kidney tissues, gut | 53 | [21,24,66,67,81,94,106,117,118,125,129,136,139,151,159,168,170,171,174,175,182,187,221,234-236,240,241,245,264,275,285,288,289,294,300,303,310,316,321,324,331-334,340,351,353,362,363,367,369,372] |
| QIAamp virus minikit            | Qiagen | DNA/RNA | Column-based          | fecal sample                                                                                                                                                                                                                                                                                                                                                                                                                                                                                                                                                                                       | 1  | [357]                                                                                                                                                                                               |
| QIAamp Viral RNA isolation kit  | Qiagen | RNA     | Column-based          | insect pools, skunk brain, human feces and sewer effluent                                                                                                                                                                                                                                                                                                                                                                                                                                                                                                                                          | 1  | [335]                                                                                                                                                                                               |

|                                               |                   |         |                       |                                                                                                  |   |                           |
|-----------------------------------------------|-------------------|---------|-----------------------|--------------------------------------------------------------------------------------------------|---|---------------------------|
| QIAprep Spin Miniprep kit                     | Qiagen            | DNA     | Column-based          | deep Mediterranean Sea water                                                                     | 1 | [196]                     |
| QIAquick viral RNA column purification system | Qiagen            | RNA     | Column-based          | skin                                                                                             | 1 | [89]                      |
| QIAseq FX DNA Library Kit                     | Qiagen            | DNA     | Magnetic beads-based  | serum                                                                                            | 1 | [98]                      |
| QIASymphony                                   | Qiagen            | DNA/RNA | Other/multiple type   | cerebral biopsy                                                                                  | 1 | [252]                     |
| Ribopure RNA extraction kit                   | Life Technologies | RNA     | Other/multiple type   | gut content                                                                                      | 1 | [87]                      |
| RNA viral extraction kit                      | Qiagen            | RNA     | Other/multiple type   | honey bees homogenization                                                                        | 1 | [83]                      |
| RNeasy kit                                    | Qiagen            | RNA     | Column-based          | lungs, liver and brain, spinal cord and spleen material                                          | 2 | [74,223]                  |
| RNeasy Lipid Tissue Mini kit                  | Qiagen            | RNA     | Column-based          | bee thorax, swabs and tissue                                                                     | 2 | [279,318]                 |
| RNeasy Mini Kit                               | Qiagen            | RNA     | Silica membrane-based | mosquitos, guts, lungs, kidney, hot spring samples, brain tissue, faecal samples                 | 7 | [30,40,42,44,144,253,278] |
| RNeasy Plant Mini Kit                         | Qiagen            | RNA     | Column-based          | leaves, plant                                                                                    | 5 | [52,109,145,161,199]      |
| RNeasy Plus Mini Kit                          | Qiagen            | RNA     | Column-based          | faecal, liver, and ectoparasite samples, Dead fish, Ticks homogenization, Brain, heart, seawater | 6 | [27,46,62,123,141,233]    |
| Spectrum Plant Total RNA kit instructions     | Sigma-Aldrich     | RNA     | Column-based          | fungus                                                                                           | 1 | [263]                     |
| SV Total Viral RNA mini kit                   | Qiagen            | RNA     | Column-based          | neonatal pig diarrhea                                                                            | 1 | [284]                     |



|                                              |                      |         |                     |                                                                      |   |                 |
|----------------------------------------------|----------------------|---------|---------------------|----------------------------------------------------------------------|---|-----------------|
| TRI reagent                                  | Sigma-Aldrich        | DNA/RNA | Solvent-based       | faecal sample, spleen and lung, <i>A. mellifera</i> and mite samples | 4 | [42,48,142,178] |
| Viral DNA kit                                | Zymo Research        | DNA     | Column-based        | pyloric caeca and body wall tissue                                   | 1 | [153]           |
| Viral Gene-spin Viral DNA/RNA Extraction Kit | iNtRON Biotechnology | DNA/RNA | Column-based        | proventriculus samples                                               | 1 | [131]           |
| Wizard DNA purification kit                  | Promega              | DNA     | Solvent-based       | insect                                                               | 1 | [116]           |
| Wizard Prep kit                              | Promega              | DNA     | Column-based        | water                                                                | 1 | [261]           |
| ZR Viral DNA/RNA Kit                         | Zymo Research        | DNA/RNA | Other/multiple type | leafhopper homogenization, faeces, fecal samples                     | 3 | [112,113,311]   |
| ZymoBIOMICS DNA kits                         | MoBio                | DNA     | Other/multiple type | water                                                                | 1 | [54]            |
