# Supplementary figures and images for: Novel Virus Identification through Metagenomics: A Systematic Review
Source: MDPI journal article supplement (doi:10.3390/life12122048), 2022-12-07

Figure S1

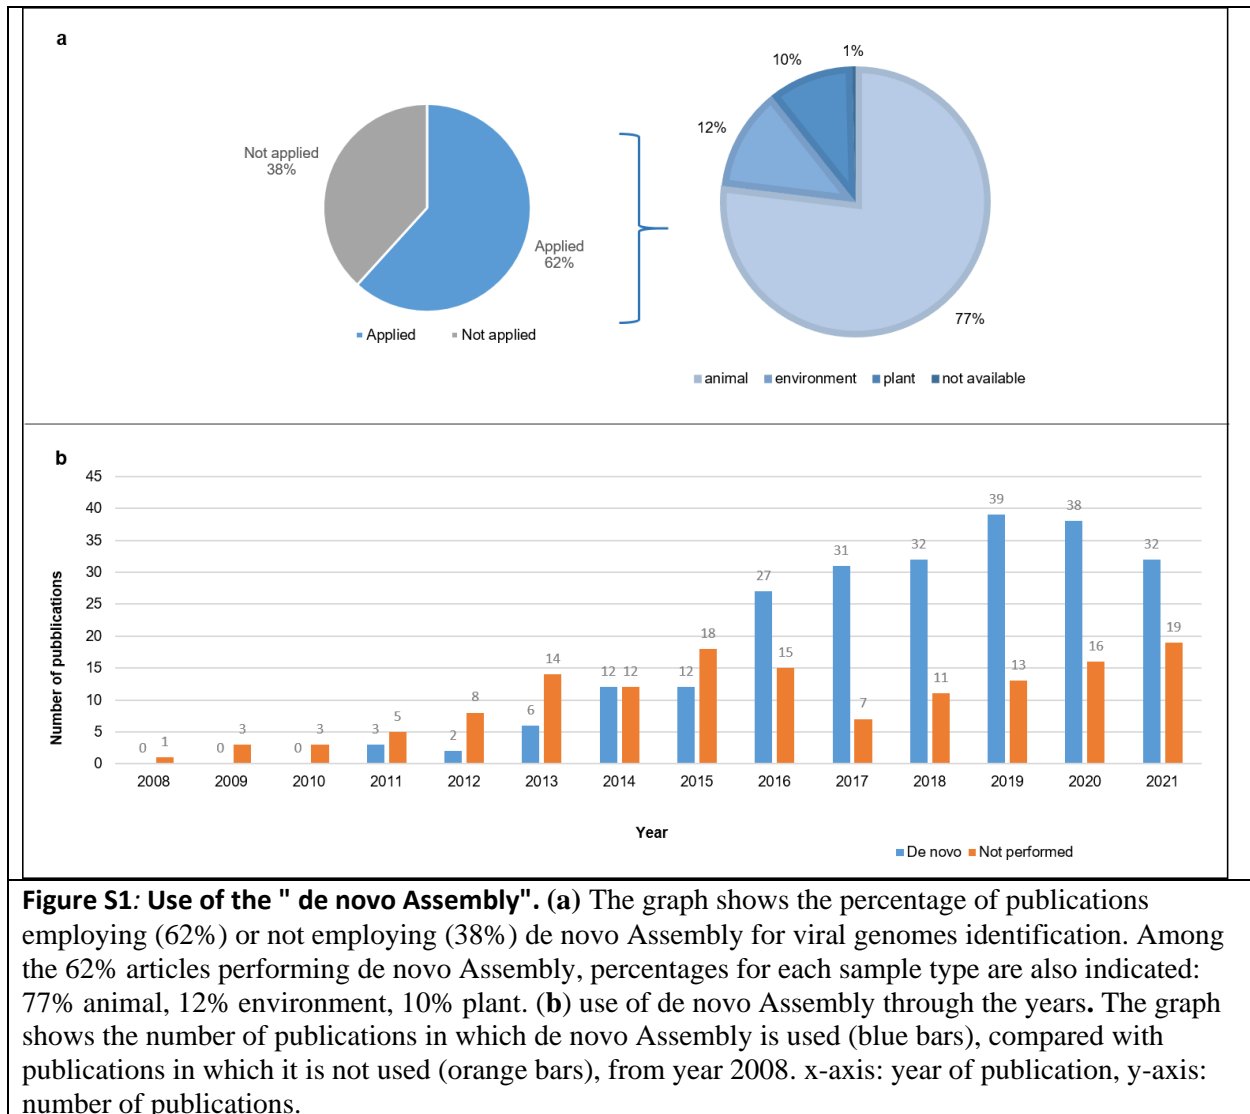

Supplement: s1 [file s1]
